1 A stronger transcription regulatory circuit of HIV-1C drives the rapid  
2 establishment of latency with implications for the direct involvement of Tat

3

4 Sutanuka Chakraborty<sup>1\*</sup>, Manisha Kabi<sup>1,\$</sup> and Udaykumar Ranga<sup>1,#</sup>

5

6 <sup>1</sup> HIV-AIDS Laboratory, Molecular Biology and Genetics Unit, Jawaharlal Nehru Centre for  
7 Advanced Scientific Research, Bangalore, India

8

9 **Running Title:** An enhanced LTR-Tat feedback promotes HIV-1C silencing

10

11 # Address of correspondence to Prof. Udaykumar Ranga at Molecular Biology and Genetics  
12 Unit, Jawaharlal Nehru Centre for Advanced Scientific Research, Jakkur P. O., Bangalore  
13 560064, India. E-mail: [udaykumar@jncasr.ac.in](mailto:udaykumar@jncasr.ac.in)

14

15 \* Present address: Chemical Engineering Division, CSIR-National Chemical Laboratory,  
16 Pune, India

17 \$ Present address: Genome Architecture, Gene Regulation, Stem Cells and Cancer  
18 Programme, Centre for Genomic Regulation (CRG), Barcelona, Spain

19

20 **Word Count:**

21 Abstract: 150 words

22 Text: 15395 words

23 **Abstract**

24

25 The magnitude of transcription factor binding site variation emerging in HIV-1C, especially  
26 the addition of NF- $\kappa$ B motifs by sequence duplication, makes the examination of  
27 transcriptional silence challenging. How can HIV-1 establish and maintain latency despite  
28 having a strong LTR? We constructed panels of sub-genomic reporter viral vectors with  
29 varying copy numbers of NF- $\kappa$ B motifs (0 to 4 copies) and examined the profile of latency  
30 establishment in Jurkat cells. We found surprisingly that the stronger the viral promoter, the  
31 faster the latency establishment. Importantly, at the time of commitment to latency and  
32 subsequent points, Tat levels in the cell were not limiting. Using highly sensitive strategies,  
33 we demonstrate the presence of Tat in the latent cell, recruited to the latent LTR. Our data  
34 allude, for the first time, to Tat establishing a negative feedback loop during the late phases of  
35 viral infection, leading to the rapid silencing of the viral promoter.

36

37 **Importance**

38

39 Over the past 10-15 years, HIV-1C has been evolving rapidly towards gaining stronger  
40 transcriptional activity by sequence duplication of major transcription factor binding sites.  
41 The duplication of NF- $\kappa$ B motifs is unique and exclusive for HIV-1C, a property not shared  
42 with any of the other eight HIV-1 genetic families. What mechanism(s) does HIV-1C employ  
43 to establish and maintain transcriptional silence despite the presence of a strong promoter and  
44 a concomitant strong, positive transcriptional feedback is the primary question we attempted  
45 to address in the present manuscript. The role Tat plays in latency reversal is well established.  
46 Our work with the most common HIV-1 subtype C (HIV-1C) offers crucial leads towards Tat  
47 possessing a dual-role in serving both as transcriptional activator and repressor at different

48 phases of the viral infection of the cell. The leads we offer through the present work have  
49 significant implications for HIV-1 cure research.

50

## 51 **Introduction**

52 The post-integration HIV-1 latency is characterized by the presence of the transcriptionally  
53 silent but replication-competent provirus within the host cells, a challenge for HIV-1  
54 eradication. A significant amount of controversy surrounds HIV-1 latency following the  
55 discovery of a latent HIV-1 reservoir in the resting CD4<sup>+ve</sup> T-cells (1, 2) whether the external  
56 host cell parameters or the intrinsic proviral elements are deterministic in modulating HIV-1  
57 latency. While some models consider HIV-1 latency to be an ‘epiphenomenon’ influenced  
58 by the activation status of the host cell and host factors (3-6), others lay emphasis on the  
59 stochastic nature of viral gene-expression noise regulated by the LTR-Tat positive feedback  
60 circuit, although the influence of the host environmental factors is not disregarded (7-11).  
61 Furthermore, several groups have attempted to develop theoretical models to explain the Tat-  
62 feedback mediated latency decision in HIV-1 (7, 12).

63

64 Master transcriptional regulatory circuits (MTRC) have been identified in prokaryotic and  
65 eukaryotic viruses functioning as integral molecular switches to toggle between  
66 transcriptional ON and OFF phases. In this context, the lysis-lysogeny decision in  
67 bacteriophage  $\lambda$  has been widely researched (13). Fate selection in  $\lambda$  phage is based on the  
68 preferential expression of two different key viral proteins, CI and Cro, from a bi-directional  
69 promoter, in a mutually exclusive fashion, and on the cooperativity of the CI repressor to  
70 establish a ‘bistable’ circuit manifesting lysis or lysogeny (14). Transcriptional circuits in  
71 several latency-establishing eukaryotic viruses function through rate-versus-level trade-off  
72 where rapid up-regulation of a viral protein is essential for efficient viral replication, but the

73 same molecule is cytotoxic at saturating levels. The immediate-early 2 (IE2) transactivator  
74 protein of CMV is a typical example of this phenomenon (15-17). The ICP0 and Rta proteins  
75 of Epstein Barr virus (EBV) and Herpes Simplex Virus-1 (HSV-1), respectively, exploit the  
76 phenomenon of cooperativity to control alternate replication fates (18-22).

77

78 Importantly, the transcription regulatory circuit in HIV-1 appears to differ significantly from  
79 those of the  $\lambda$  phage or the eukaryotic viruses mentioned above. First, there is no evidence for  
80 a repressor molecule or negative feedback loop controlling the HIV-1 circuit while Tat  
81 functioning as only an integral component of a positive feedback circuit. Second, the Tat-  
82 feedback circuit seems to lack bistability such that Tat transactivates the LTR as a monomer  
83 with no self-cooperativity to form multimers ( $H=1$ ) (23). Tat was proposed to undergo post-  
84 translational modifications at specific sites to modulate latency and to account for Tat mono-  
85 stability, and the lack of self-cooperativity. It was proposed that enzymatic conversion of  
86 acetylated Tat ( $Tat_A$ ) to a more stable deacetylated form ( $Tat_D$ ) constitutes a feedback-resistor  
87 module with a predominant off state (12). Importantly, the models described above are  
88 majorly based on mathematical simulations supported by simple reaction parameters with  
89 minimal experimental validation. Of note, these studies exclusively modeled the HIV-1  
90 subtype B system, although other genetic families of HIV-1 contain subtype-specific  
91 molecular features.

92

93 The examination of transcriptional silence is expected to be technically more challenging in  
94 HIV-1C as compared to that in the other subtypes of HIV-1, including HIV-1B, for two  
95 different reasons. First, HIV-1C contains several subtype-specific variations in nearly all  
96 types of transcription factor binding sites (TFBS) present in the viral promoter, including that  
97 of NF- $\kappa$ B, Sp1, RBF-2, and other elements. Among these variations, the copy number

98 difference of the NF- $\kappa$ B binding elements is the most striking one and unique to HIV-1C.  
99 While other subtypes of HIV-1 contain a single (HIV-1E) or two (all others including HIV-  
100 1B) NF- $\kappa$ B motifs in the viral enhancer, HIV-1C contains three or four of these motifs  
101 (Figure 1). Second, the additional NF- $\kappa$ B binding elements present in HIV-1C are genetically  
102 diverse (24). Three different kinds of NF- $\kappa$ B motifs, H, C, and F, may be found in the long-  
103 terminal repeat of HIV-1C (C-LTR). We demonstrated previously that the progressive  
104 acquisition of the additional NF- $\kappa$ B motifs enhances transcriptional strength of the viral  
105 promoter in HIV-1C and confers replication superiority over the canonical viral strains in  
106 natural infection, and under experimental conditions (25). Given the positive correlation  
107 between the transcriptional strength of the viral promoter and the enhanced strength of  
108 transcriptional feedback, it is intriguing how viral latency is favoured in the variant viral  
109 strains containing a higher number of NF- $\kappa$ B motifs. In this backdrop, the present study is an  
110 attempt to examine the influence of variation in the number of NF- $\kappa$ B binding elements in C-  
111 LTR. Of note, the focus of the present study is only on the copy-number difference of the  
112 NF- $\kappa$ B binding sites, therefore, on the overall strength of transcription, and its influence on  
113 viral latency. The present study does not aim at examining the impact of genetic diversity of  
114 NF- $\kappa$ B binding motifs on viral latency.

115

116 Using sub-genomic HIV-1C reporter viruses that differed in the LTR-Tat transcriptional  
117 feedback architecture and using panels of LTR variant viral strains that varied in the copy-  
118 number of NF- $\kappa$ B motifs, we demonstrate for the first time that the enhanced transcriptional  
119 strength of the LTR leads to a rapid establishment of viral latency. Further, we explain the  
120 apparent paradox by demonstrating that a stronger transcriptional activity of the LTR leads to  
121 higher levels of cellular Tat protein, which, above a certain threshold, possibly establishes  
122 negative feedback on viral transcription. Importantly, using indirect immunofluorescence and

123 a highly sensitive proximity ligation assay, for the first time, we demonstrate the presence of  
124 Tat in cells harboring an active or a latent provirus. We also show the recruitment of Tat not  
125 only to the active but also the latent proviral LTR, albeit at a magnitude several folds lower.  
126 Our data, thus collectively allude to Tat playing a deterministic role in initiating  
127 transcriptional silence through negative feedback regulation.

128

## 129 **RESULTS**

130 **The strengths of viral gene expression, as well as Tat-transactivation are directly**  
131 **proportional to the number of functional NF- $\kappa$ B motifs in the HIV-1C enhancer.**

132 The present study is an attempt to examine the influence of variation in the number of NF- $\kappa$ B  
133 binding elements in the C-LTR on viral gene expression and latency. To this end, we  
134 employed two different Jurkat T cell models, the autonomous Tat-feedback (ATF), and the  
135 tunable Tat-feedback (TTF) models to examine HIV-1C latency. The sub-genomic viral  
136 vectors encoding EGFP (or d2EGFP, a variant GFP with a shorter half-life), were  
137 pseudotyped with VSV-G envelope. The two experimental models differ from each other in  
138 the manner the LTR-Tat-feedback axis is regulated. Using these two experimental systems,  
139 we examined transcriptional activation and silencing as a function of the promoter strength  
140 (by varying the copies of NF- $\kappa$ B motifs ranging from 0 to 4 copies in the ATF model) or the  
141 Tat-feedback strength (by modulating the physiological concentration of Tat in the TTF  
142 model) or both from a panel of HIV-1C LTRs.

143 The 'Autonomous Tat-feedback' (ATF) model of HIV-1 comprises of the presence of only  
144 the LTR and Tat, with all the other viral factors being absent, thus retaining the natural  
145 functional association between the two major viral factors, as reported previously (7, 26).  
146 Several groups have adopted the ATF model to elucidate the mechanisms governing HIV-1

147 latency. In the present study, we modified the pLGIT sub-genomic reporter vector (7) by  
148 substituting the Tat ORF and the 3' LTR of the parental vector, both of HIV-1B origin, with  
149 the homologs of HIV-1C to construct pcLGIT. In the pcLGIT (cLTR-EGFP-IRES-cTat)  
150 vector, the expression of EGFP and C-Tat are under the control of the C-LTR.

151 Given the natural propensity of HIV-1C to contain more copies of the NF- $\kappa$ B motif in the  
152 enhancer, three copies typically and up to four copies frequently (24), we constructed a panel  
153 of cLGIT viral strains comprising of NF- $\kappa$ B copy-number variant LTRs (p911a series;  
154 Materials and Methods). Using the prototype C-LTR containing four functional NF- $\kappa$ B  
155 binding sites (FHHC), we introduced inactivating point mutations sequentially into the  
156 enhancer to reduce the number of functional NF- $\kappa$ B motifs progressively, from 4 copies to 0  
157 copies (Figure 2A). In some of the subsequent experiments involving the ATF model, we also  
158 resorted to the cLdGIT panel of viral strains, where the EGFP reporter was substituted with  
159 d2EGFP in the pcLdGIT vector backbone with the same set of NF- $\kappa$ B variant LTRs as the  
160 pcLGIT (p911b series; Materials and Methods). The viral stocks of the panel pseudotyped  
161 with VSV-G envelope were generated in HEK293T cells, and the relative infectious units  
162 (RIU) of the stocks were determined in Jurkat cells using EGFP/d2EGFP fluorescence.

163 First, we compared the levels of EGFP expression from the LTR-variant cLGIT panel in the  
164 context of a functional, positive Tat-feedback loop, where both the reporter gene and the  
165 concomitant Tat-feedback strength are expected to vary based on the autoregulatory circuit.  
166 Jurkat cells, infected with each viral strain of the cLGIT panel independently at ~0.5 RIU  
167 were either activated with a combination of global T-cell activators (40 ng/ml PMA + 40  
168 ng/ml TNF $\alpha$  + 200 nM TSA + 2.5 mM HMBA) or maintained without activation and 24  
169 hours following the treatment, both the EGFP fluorescence and the Tat transcript levels were  
170 examined using flow cytometry and Tat RT-PCR, respectively (Figure 2B). Representative,  
171 stacked histograms depicting the three conditions of treatment - uninfected Jurkat cells (black

172 dotted histogram), infected but untreated cells (black hollow histogram) and, infected and  
173 activated cells (solid grey histogram) corresponding to all the five NF- $\kappa$ B variant strains are  
174 presented (Figure 2C). Importantly, when the cell population in each histogram was  
175 demarcated into three categories based on the intensity of EGFP expression (EGFP<sup>Low</sup>,  
176 EGFP<sup>Low</sup>, and EGFP<sup>High</sup>), it was the EGFP<sup>High</sup> fraction that displayed the most pronounced  
177 impact of the NF- $\kappa$ B site copy number difference on transactivation. The percentage of the  
178 EGFP<sup>High</sup> fraction was directly proportional to the number of NF- $\kappa$ B motifs in the LTR,  
179 which was also reflected in the peak height of the EGFP<sup>High</sup> cluster in the stacked histogram  
180 profile.

181 We quantitated EGFP fluorescence in terms of mean fluorescence intensity (MFI) as a  
182 function of the copy numbers of NF- $\kappa$ B motifs in the LTR and found a direct proportionality  
183 between them (Figure 2D), although the percent of viral infectivity was comparable (inset;  
184 Figure 2D). The LTR containing four NF- $\kappa$ B motifs (FHHC; 4- $\kappa$ B) demonstrated the highest  
185 fluorescence intensity with ( $82,917.51 \pm 825.7$  RFU) and without ( $12,365.13 \pm 179.3$  RFU)  
186 activation; while, the LTR in which all the four NF- $\kappa$ B motifs have been mutated (OOOO; 0-  
187  $\kappa$ B) demonstrated the lowest levels of the reporter expression with ( $22,190.38 \pm 668.1$  RFU)  
188 and without ( $6,083.36 \pm 290.5$  RFU) activation. The activity of the other three LTRs  
189 containing 3 (OHHC; 3- $\kappa$ B), 2 (OOHC; 2- $\kappa$ B), or 1 (OOOC; 1- $\kappa$ B) functional NF- $\kappa$ B motifs  
190 remained between the two extremes. The fold enhancement in EGFP expression was directly  
191 proportional to the number of functional NF- $\kappa$ B motifs in the LTR with a linear correlation ( $r$   
192 = 0.98) between the transcriptional activity and the functional NF- $\kappa$ B motifs in the LTR  
193 (Figure 2E). A viability assay performed using a live/dead stain before the analysis of EGFP  
194 expression confirmed minimal cell-death following activation (Figure 2F). Similar to the  
195 EGFP MFI profile, the level of Tat transcript expression (Figure 2G) and fold transactivation  
196 (Figure 2H) were directly proportional to the number of NF- $\kappa$ B copies in the LTR ( $r = 0.96$ )



197 with or without activation. The evaluation of the transcripts of GAPDH, as an internal  
198 cellular reference control in a real-time RT-PCR, validated the expression levels of Tat  
199 mRNA from the viral panel under diverse cell activation conditions (Figure 2I). It is evident  
200 from the expression profile that a perfect correlation exists between the number of NF- $\kappa$ B  
201 motifs and the level of gene expression from the promoter. Importantly, the expression of  
202 EGFP can be used as a surrogate marker for the expression of Tat, since a perfect correlation  
203 exists between the two genes co-expressed from the viral promoter. In the subsequent assays,  
204 we routinely used the expression of EGFP as a measure of the transcriptional activity of the  
205 viral promoter with frequent confirmation of Tat expression.

206

#### 207 **A stronger viral promoter establishes latency at a faster rate.**

208 A major paradox in the transcriptional regulation of HIV-1C is that a virus that must establish  
209 latency tends to acquire a stronger promoter containing more NF- $\kappa$ B motifs, especially when  
210 other genetic families of HIV-1 do not employ such a strategy. To understand this paradox,  
211 we used the NF- $\kappa$ B copy number variant strains of the ATF panel to determine the kinetics of  
212 latency establishment. Using the experimental strategy depicted (Figure 3A), we infected  
213 Jurkat cells at a low RIU (~0.1-0.2) to ensure a single integration event per cell. The cells  
214 were allowed to expand before inducing them with a cocktail of global activators, and the  
215 EGFP<sup>+</sup> cells were recovered by sorting. The kinetics of EGFP switch-off was subsequently  
216 monitored every four days for 16 days by flow cytometry. A representative strategy of cell  
217 gating and sorting is presented (Figure 3B).

218 Using the experimental strategy described above, and the cLGIT panel of NF- $\kappa$ B copy  
219 number variant viral strains containing 4 to 0 copies of the TFBS, we evaluated how the  
220 transcriptional strength of HIV-1 LTR would influence the kinetics of latency establishment

221 over 16 days. The analysis found a profound impact of NF- $\kappa$ B motif copy number on the  
222 kinetics of HIV-1 latency establishment. Representative, stacked histogram profiles of the  
223 LTR-variant strains depicting the temporal expression pattern of the EGFP<sup>+</sup> sorted cells are  
224 presented (Figure 3C). Although latency establishment was evident for all the five LTRs  
225 examined, the rapidity of latency establishment unexpectedly was directly proportional to the  
226 number of NF- $\kappa$ B motifs in the viral enhancer (Figures 3D and 3E). In other words, the  
227 stronger was the transcriptional activity of the LTR, the faster the latency was established.  
228 Based on the slope of EGFP downregulation, the LTRs could be classified into two broader  
229 groups: The two strong promoters, the 3- and 4- $\kappa$ B LTRs, down-regulated the EGFP  
230 expression at a significantly faster rate than the other three not strong promoters 2-, 1- and 0-  
231  $\kappa$ B LTRs. In the present manuscript, we classify the LTRs into two groups, ‘strong’ and  
232 ‘weak’ based on the difference in the transcriptional strength, a categorization consistent with  
233 many other properties we analyzed subsequently, although the 2- $\kappa$ B LTR occasionally  
234 occupied an intermediate position (see below). For instance, the EGFP intensity values (RFU)  
235 of 4- $\kappa$ B LTR reduced approximately 8-fold from a value of  $30,631.64 \pm 1,278.3$  on D0 to  
236  $3,771.06 \pm 245.2$  on D16, whereas the corresponding values for the weakest 0- $\kappa$ B LTR were  
237 the modest and reduced by only two-folds during the same period from  $4,455.11 \pm 258.9$  to  
238  $2,371.98 \pm 59.3$ . Of note, although both 3- and 4- $\kappa$ B LTRs demonstrated a rapid EGFP  
239 downregulation, the 3- $\kappa$ B LTR established viral latency at a faster rate, and the difference  
240 between the two promoters was highly reproducible and significant. It is not clear if this  
241 difference may have implications for the relative replication fitness of the two viral strains.

242 The expression profile of the Tat transcripts determined using an RT-PCR on days 0, 8 and,  
243 16 also correlated directly with the NF- $\kappa$ B copy number in the LTR, as expected (Figure 3H)  
244 and resembled that of the EGFP MFI profile of the LTRs. A profound reduction in Tat  
245 expression was observed for all the viral promoters between days 0 and 8. The 4- $\kappa$ B LTR

246 showed the highest level of Tat expression,  $92.94 \pm 5.4$  at D0 that dropped to  $12.02 \pm 0.8$  at  
247 D8 and subsequently to  $2.3 \pm 0.01$  at D16. The corresponding values for the 3- $\kappa$ B LTR are  
248  $71.76 \pm 2.5$ ,  $12.8 \pm 0.73$ , and  $1.15 \pm 0.1$ , respectively. Of note, comparable expression of  
249 GAPDH transcripts was observed from the viral panel at all the time points of latency  
250 establishment as quantitated using a real-time PCR (Figure 3I). Furthermore, using a Taqman  
251 qPCR, we confirmed a single integration event per cell in all the five stable cell pools, thus  
252 ruling out the possibility that the difference in the integration frequency influenced the  
253 outcome of the analyses (Figure 3J). A live/dead exclusion assay indicated a comparable  
254 percentage of live cells among the panel members, and uniform cell viability was maintained  
255 temporally throughout latency establishment (Figure 3K). Importantly, the live/dead gating  
256 excluded the dead cells before the EGFP analysis (post-sort gating; Figure 3B); thus,  
257 precluding the possibility of EGFP auto-fluorescence from dead cells influencing the data  
258 analysis. In summary, our data are suggestive that the enhanced strength of HIV-1C LTR due  
259 to the increase in the number of NF- $\kappa$ B sites could play a decisive role in regulating viral  
260 latency. A positive correlation between the Tat-transcript levels and the rapid rate of EGFP  
261 switch-off by the strong viral promoters is strongly indicative of the Tat-mediated positive  
262 feedback loop playing a critical role in establishing viral latency.

263

264 **The kinetics of latency establishment is predominantly a function of the EGFP<sup>High</sup> cells**  
265 **displaying a biphasic mode of transcriptional silence.**

266 At the baseline of the above assay, all the variant viral strains were represented by nearly  
267 100% EGFP<sup>+</sup> cells, but with a varying range of EGFP fluorescence intensities (referred to as  
268 total EGFP<sup>+</sup> cells throughout the manuscript). However, a marked difference in the mean  
269 intensity of EGFP among the LTR-variants was noted at D0 time point post-sorting (compare

270 Figures 3D and 3E). This apparent paradox could be explained by analyzing only the  
271 EGFP<sup>High</sup> cells but not the total EGFP<sup>+</sup> population. In the present essay, we, therefore, gated  
272 the cells into two additional subpopulations - EGFP<sup>High</sup> (MFI >10<sup>4</sup> RFU) and EGFP<sup>Low</sup> (MFI  
273 ~10<sup>2</sup>-10<sup>4</sup> RFU) - as depicted in the post-sort gating strategy (Figure 3B), as evident in the  
274 histogram profile of each NF-κB variant strain (Figure 3C). Kinetic curves of % EGFP<sup>High</sup>  
275 and EGFP<sup>Low</sup> cells were then constructed from the above-gated subpopulations. Importantly,  
276 the reduction in the total EGFP MFI (Figure 3D) as well as the Tat-transcript levels (Figure  
277 3H) corresponded perfectly only with the % EGFP<sup>High</sup> cells (Figure 3F), but not with the %  
278 EGFP<sup>Low</sup> cells (Figure 3G). Thus, the EGFP<sup>High</sup> cells, not the total EGFP<sup>+</sup> cells, are decisive  
279 in regulating viral latency. Additionally, the % EGFP<sup>High</sup> temporal curves of the strong (3-  
280 and 4-κB) versus weak LTRs (0-, 1- and even 2-κB) were profoundly different. Firstly, on  
281 day 0, the strong LTRs produced the highest percentage of EGFP<sup>High</sup> cells as compared to the  
282 weak LTRs. Secondly, the latency establishment of the strong LTRs appeared to have  
283 manifested in two distinct phases: a rapid reduction of EGFP expression between days 0 and  
284 8 and a slower rate of decrease after D8; the bi-phase latency profile was either absent or not  
285 prominent with the weak LTRs. Thirdly, the rapid fall in EGFP expression of the EGFP<sup>High</sup>  
286 pool of the strong LTRs between days 0 and 8 synchronized with a significant rise in the  
287 EGFP<sup>Low</sup> cell pool peaking on D8. These data collectively allude to the critical role the  
288 transcriptional strength of HIV-1 LTR plays in latency establishment. In summary, the  
289 EGFP<sup>High</sup> cell pool, not that of the EGFP<sup>Low</sup> cells, plays a decisive role in the population  
290 latency kinetics of the virus.

291

### 292 **LTR-silencing in the GFP<sup>High</sup> cells implicates Tat feedback**

293 Given the apparent significance of the EGFP<sup>High</sup> phenotype for HIV-1 latency establishment,  
294 we investigated the phenomenon further by sorting only the EGFP<sup>High</sup> cell pools for all the

295 NF- $\kappa$ B variant strains that represented a population with a comparable level of fluorescence  
296 intensity (Figure 4). At Day 0, the EGFP MFI values were uniform among the variant viral  
297 strains of the panel and we monitored downregulation of the green fluorescence every four  
298 days for 24 days (Figure 4A). A clear distinction between the strong (4- and 3- $\kappa$ B) and the  
299 weak (2-, 1-, and 0- $\kappa$ B) LTRs was evident in the EGFP MFI profile (Figure 4B) or when the  
300 EGFP<sup>+</sup> percentage was considered (Figure 4C), although the 2- $\kappa$ B LTR sometimes occupied  
301 an intermediary position; the rate of latency establishment was significantly rapid for strong  
302 LTRs. The biphasic mode of latency establishment, rather than a gradual and monophasic  
303 mode, was evident from the stacked histogram profiles of the sorted EGFP<sup>High</sup> pool (Figure  
304 4F). We demonstrated above that a progressively increasing NF- $\kappa$ B site number in the LTR  
305 steadily enhances the transcriptional strength as well as the physiological concentration of Tat  
306 (Figures 2D and 2G). We, therefore, speculate that higher cellular Tat levels, an invariable  
307 outcome of the stronger positive transcriptional feedback, are necessary for the rapid  
308 silencing of the LTR as manifested by the EGFP<sup>High</sup> cells of the strong LTRs.

309

310 Of note, the process of latency establishment above was not complete with any of the LTRs  
311 of the cLGIT panel, regardless of the transcriptional strength. The percent of EGFP<sup>+</sup> cells  
312 reached only the halfway mark after 24 days of sorting even for the strong LTRs that  
313 established latency at a faster rate (Figures 4B and 4C). Importantly, the long half-life of the  
314 EGFP, ~ 48 h, used in these vectors as a surrogate marker for latency did not represent the  
315 actual dynamics of the LTR transcriptional activity faithfully. The cells were continued to be  
316 scored as positive for EGFP fluorescence for a significant period even after the LTR was  
317 switched off, leading to a false positive scoring. To rectify this problem, we substituted EGFP  
318 in the reporter viral strains with d2EGFP characterized by a significantly shorter half-life (2

319 vs. 48 h) (27). The viral strains of the new panel (cLdGIT) are analogous to the previous  
320 panel.

321

322 Using the new panel, we sorted the d2EGFP<sup>High</sup> cells as above to establish the profiles of  
323 latency. Several differences in the profiles of latency were readily evident between the cLGIT  
324 and cLdGIT panels (compare Figures 4B and 4D; 4C and 4E). Unlike the cLGIT panel, the  
325 cLdGIT variants successfully established a near-complete viral latency, and all the members  
326 of the panel demonstrated latency establishment at a faster rate; the d2EGFP MFI values  
327 reduced to the baseline within 96 h following sorting (Figure 4D). Although the substitution  
328 of EGFP with d2EGFP masked the differences in latency kinetics among the members of the  
329 cLdGIT panel to some extent, the overall pattern of latency establishment was consistent with  
330 that of the cLGIT counterparts. The percentage of the cells downregulating d2EGFP  
331 expression was directly proportional to the number of the NF- $\kappa$ B motifs in the viral promoter  
332 (Figure 4E). For instance, the time required for the loss of fluorescence in half of the cells  
333 (FL<sub>50</sub>) was estimated to be 23.3, 22.1, 24.64, 32.9, and 48 h for the 4-, 3-, 2-, 1-, and 0- $\kappa$ B  
334 viral strains, respectively. Thus, a direct correlation between the transcriptional strength of  
335 the viral promoter and the rate of latency establishment was consistent between the cLdGIT  
336 and cLGIT panels. The bi-phasic mode of latency establishment was also evident in the  
337 cLdGIT model (Figure 4G).

338

339 Collectively, our data are assertive that the transcriptional strength of the HIV-1 promoter is  
340 an essential regulatory parameter for viral latency. Further, the latency kinetics in the Tat-  
341 transactivated population (GFP<sup>High</sup> cells), of two different models, cLGIT and cLdGIT  
342 vectors of the ATF panel, followed an NF- $\kappa$ B-site copy number-dependent transcriptional  
343 silencing.

344

345 **A bimodal (ON or OFF) latency establishment in the pools of cloned cell lines**

346 The observation that the transcriptional strength of the LTR and the feedback loop of Tat  
347 function synergistically to silence the viral promoter was drawn based on cell pools. Since  
348 individual cells in a pool are heterogeneous in several biological properties, including the site  
349 of proviral integration, we examined the nature of the latency profile in multiple cloned cell  
350 lines of all the five LTR variants. Jurkat cells were infected with the viral strains of cLGIT  
351 (ATF) panel, stimulated with the global activation cocktail, single EGFP<sup>High</sup> cells were sorted  
352 into individual wells of a 96-well culture plate, the sorted cells were allowed to expand for 3-  
353 4 weeks, and the EGFP expression profiles were assessed by flow cytometry (Figure 5A). We  
354 recovered 16-25 clones from each NF- $\kappa$ B variant, and 16 clones from each variant were  
355 randomly selected for the latency analysis. Of note, since each cell line descended from a  
356 single parental cell, all the daughter cells derived from the parental cell are expected to have a  
357 common site of integration.

358 Based on the EGFP expression pattern, the clones could be categorized into three distinct  
359 types (Figure 5B). The persisters, all the daughter cells descending from a single parental cell  
360 sustain expression of high-intensity EGFP throughout the observation period of 28 days and  
361 even beyond, comparable to that of the original parental cell, indicative of a provirus  
362 transcribing actively in all the daughter cells. The relaxers, all the daughter cells of the  
363 EGFP<sup>High</sup> parental cell, have switched-off EGFP expression entirely during the period of  
364 observation. The bimodallers, the third clonal type, demonstrated a distinctive feature of the  
365 simultaneous existence of both the phenotypes among the daughter cells, although all the  
366 cells in the cluster were derived from the same EGFP<sup>High</sup> parental cell. One subset of the cells  
367 maintained high EGFP expression (EGFP<sup>High</sup>), whereas the other subset down-regulated the

368 reporter gene completely (EGFP<sup>-</sup>) with the minimal manifestation of an intermediate  
369 phenotype.

370 Importantly, all the five viral strains of the panel displayed the three clonal phenotypes  
371 described above with the distinction that the proportion of the three phenotypes is directly  
372 correlated with the copy number of NF- $\kappa$ B sites in the LTR. Given the limitation of available  
373 cells for the flow analysis, we could determine the phenotype of the clonal cells only at D21  
374 and D28, not earlier. We analyzed 16 randomly selected clones for each of the five LTRs of  
375 the panel (Figure 5C). The profile of the three phenotypes varied significantly among the  
376 members of the panel and appeared to associate with the transcriptional strength of the LTR.  
377 On D21, a larger proportion of cell lines representing the strong viral promoters (4- and 3- $\kappa$ B  
378 LTRs) transitioned to the OFF state as compared to those of weak promoters (1- and 0- $\kappa$ B  
379 LTRs); in contrast, the cells of 2- $\kappa$ B LTR occupied an intermediate position. On D28, the  
380 strong LTRs contained no persistent phenotype and fewer bimodal clones. The strong viral  
381 promoters downregulated EGFP expression, both persistent and bimodal phenotypes at a  
382 significantly faster rate as compared to the other three promoter variants. Despite the  
383 limitation of the small number of clonal cell lines used in the analysis, these data are broadly  
384 consistent with the results of cell pools (Figure 4). Thus, cell pools and clonal cell  
385 populations, both the models demonstrated a direct correlation between the transcriptional  
386 strength of the LTR and the rate of latency establishment. Further, both the experimental  
387 models are also consistent with each other in demonstrating a bimodal, not a gradual, latency  
388 establishment.

389 The clonal cell lines that display the bimodal EGFP phenotype offer an excellent  
390 experimental model as these clonal lines demonstrate two contrasting phenotypes (EGFP<sup>High</sup>  
391 and EGFP<sup>-</sup> expression) despite an identical viral genotype, chromatin background and, host-  
392 cell activation. We selected two clones, 3c and 8c representing the strong 4- $\kappa$ B and 3- $\kappa$ B



393 LTRs, respectively, and characterized them for their bimodality. The two daughter  
394 populations, EGFP<sup>High</sup> and the EGFP<sup>-</sup> were subsequently enriched using FACS sorting and  
395 examined for the nature of transcription complexes recruited to the active and silent LTRs  
396 using ChIP analyses (see below). Importantly, a vast majority of the EGFP<sup>-</sup> cells of the  
397 bimodal clones representing the 4- or 3-κB LTRs could be fully reactivated to the EGFP<sup>High</sup>  
398 phenotype; 95.6% (Figure 5D) and 90.4% (Figure 5H) EGFP<sup>High</sup> cells, respectively,  
399 following global activation. The levels of proviral integration between the two  
400 subpopulations of each bimodal clone were comparable and close to ~1.0 (Figures 5E and  
401 5I), ruling out the possibility of integration frequency differences underlying the bimodal  
402 phenotype. Importantly, the Tat transcript levels in the EGFP<sup>+</sup> subfractions of both the clonal  
403 cell lines were significantly higher compared to their EGFP<sup>-</sup> counterparts, approximately 112  
404 folds for the 4-κB (Figure 5F) and 80 folds for the 3-κB clones (Figure 5J). We also excluded  
405 the possibility of the bimodal phenotype arising from cell cycle differences between the two  
406 phenotypes. We compared the proportion of cells in the different phases of the cell cycle (G1,  
407 S, and G2/M) between the EGFP<sup>-</sup> and EGFP<sup>High</sup> subpopulations. We found that the cell  
408 proportions were comparable in both the phenotypes. The data were reproducible in both the  
409 4- (Figure 5G) and the 3-κB (Figure 5K) clones; the manifestation of the two contrasting  
410 phenotypes in the bimodallers was therefore unlikely to be a consequence of cell-cycle  
411 differences.

412

### 413 **A tunable regulatory circuit of HIV-1 transcription alludes to the direct role of Tat in** 414 **latency establishment**

415 The stronger transcriptional activity of the LTR is expected to lead to a proportionately  
416 higher expression of Tat, which in turn should increase the transcriptional activity of the LTR  
417 further. As a consequence of the unique arrangement, the two principal regulatory elements

418 collectively modulate viral gene expression. In this backdrop, the profile of latency kinetics  
419 observed using the ATF model above cannot be ascribed to the different functional activity of  
420 either of the elements alone. It was, therefore, necessary to employ a strategy where Tat  
421 transactivation alone becomes a variable factor while the transcriptional strength of the LTR  
422 remains constant. To this end, we constructed a new HIV-1-Jurkat cell line model, the  
423 ‘Tunable Tat-feedback’ (TTF) model, where the transactivation strength of Tat can be  
424 modulated independently while keeping the transcriptional strength of the LTR constant. Tat  
425 in the TTF model was engineered to possess two unique properties as compared to that in the  
426 ATF model (Figure 6A). First, Tat was fused with DsRed2-RFP (stated as RFP throughout  
427 the manuscript) to express as a fusion protein enabling the direct visualization of its  
428 expression. The new HIV-1 reporter vector pcLdGITRD (cLTR-d2EGFP-IRES-  
429 Tat:RFP:DD), thus, co-expressed two different fluorescent proteins, d2EGFP and Tat-RFP,  
430 under the control of the LTR. Second, the Tat-RFP fusion protein was tagged with the C-  
431 terminal degradation domain (DD) of FK506 binding protein (Tat:RFP:DD). The DD domain  
432 can target the fusion protein for rapid proteasome-mediated degradation (28). Shield1, a small  
433 molecule ligand, however, can rescue the DD-mediated degradation by specifically  
434 interacting with the DD motif and stabilizing the target protein in a dose-responsive manner  
435 (29). The sub-genomic HIV-1 reporter vector pcLdGITRD, representing the TTF model,  
436 thus, can fine-tune the intracellular concentration of the ‘Tat:RFP:DD’ fusion protein by  
437 changing the concentration of Shield1 in the culture medium, in the context of a fixed LTR  
438 strength.

439

440 We constructed a panel (cLdGITRD, the p913 series; Materials and Methods) of two LTR-  
441 variant viral strains consisting of 3 or 1 NF- $\kappa$ B motifs, representing the strong and weak  
442 LTRs, respectively (Figure 6A). A direct correlation between the Shield1 concentration in the

443 medium, ranging from 0 to 5  $\mu$ M, and the intensity of Tat-RFP expression was observed in  
444 HEK293T cells using the 3- $\kappa$ B viral reporter vector (Figure 6B). Importantly, the viruses  
445 could infect the target Jurkat cells. We evaluated the levels of d2EGFP expression and the  
446 Tat-mediated transactivation, with an increasing concentration of Shield1 in the medium,  
447 using the experimental strategy as depicted (Figure 6C). Interestingly, the effect of Shield1  
448 concentration was directly manifested on the d2EGFP<sup>High</sup> population in the stacked histogram  
449 profile (black arrow), indicating Shield1 dose-dependent Tat transactivation and also  
450 confirming that the d2EGFP<sup>High</sup> phenotype represented the Tat-transactivated cells (Figure  
451 6D). A direct correlation was also established in the stable Jurkat cells between the Shield1  
452 concentration and d2EGFP MFI or ‘Tat:RFP:DD’ expression (Figures 6E and 6H  
453 respectively) suggesting Shield1-dependent stabilization of the ‘Tat:RFP:DD’ cassette and  
454 the subsequent Tat-mediated LTR transactivation. Of note, although we normalized the viral  
455 infection, the % d2EGFP<sup>+</sup> values demonstrated a dose-response proportional to the Shield1  
456 concentration even though the d2EGFP itself does not contain the DD of FKBP (Figure 6G).  
457 The optimal fold activation of the d2EGFP expression (Figure 6F) and Tat transcript levels  
458 (Figure 6I) were found to be 1  $\mu$ M and 2.5  $\mu$ M, respectively. In the subsequent experiments,  
459 therefore, we used Shield1 in the range of 0 to 3  $\mu$ M.

460

461 Importantly, the fusion of Tat with DsRed2-RFP offered the advantage of tracking the  
462 expression of Tat in real-time during latency establishment. To determine the kinetics of  
463 latency establishment in Jurkat cells, we used an experimental schematic as depicted (Figure  
464 7A). Jurkat cells were infected with 3- or 1- $\kappa$ B viral strain at an RIU of ~0.1-0.2 in the  
465 presence of 1  $\mu$ M Shield1 and expanded for a week in the presence of Shield1. Subsequently,  
466 the cells were activated with the global activators for 24 h, the d2EGFP<sup>High</sup> population (MFI  
467  $\sim 10^4$  RFU) was sorted, the sorted cells were maintained separately at four different

468 concentrations of Shield1 (0, 0.5, 1.0 and 3.0  $\mu$ M), and the levels of d2EGFP and Tat-RFP  
469 expression were monitored every 24 h by flow cytometry.

470

471 The TTF model of latency offered several essential insights. Importantly, the ability to  
472 visualize two different fluorescent proteins (d2EGFP and Tat:RFP:DD) co-expressed under  
473 the LTR permitted to identify the different stages of the viral gene expression and latency,  
474 which we collectively refer to as the viral 'latency cycle'. Although both the fluorescent  
475 proteins were expressed under the control of the same viral promoter, the expression of  
476 d2EGFP was perceptible earlier and at a higher intensity than that of the Tat:RFP:DD fusion  
477 protein. The increased molecular size of the Tat:RFP:DD fusion protein, the slow maturation  
478 of DsRed2, and the compromised translation efficiency due to the IRES element, all may  
479 have contributed to the observed difference between the d2EGFP and Tat-RFP expression  
480 profile (Figure 7B, Day 0). The profile of gene expression through the different phases of the  
481 latency cycle is remarkably different between the two viral promoters. The transiting of the  
482 cells through the successive phases of the latency cycle is illustrated explicitly when the 3- $\kappa$ B  
483 LTR profile is examined (Figure 7B, top panel). At Day 0 following the d2EGFP<sup>High</sup> sort, the  
484 vast majority of cells (92.8%) were d2EGFP<sup>+</sup> Tat-RFP<sup>-</sup> representing a transcriptionally active  
485 viral promoter (Figures 7B, top panel; Day 0 and 7C). During the following 24 hours, the  
486 d2EGFP<sup>+</sup> Tat-RFP<sup>-</sup> cells exited this compartment via two distinct and diagonally opposite  
487 routes. While a significant proportion of these cells (approximately 15%) switched off  
488 d2EGFP expression to directly return to the d2EGFP<sup>-</sup> Tat-RFP<sup>-</sup> compartment, approximately  
489 6.6% of cells up-regulated Tat-RFP expression from the 3- $\kappa$ B LTR to transit to the d2EGFP<sup>+</sup>  
490 Tat-RFP<sup>+</sup> compartment alluding to a strong Tat-dependent transcriptional activity (Figures  
491 7B, top panel; Day 1 and 7D). At the subsequent time points, d2EGFP<sup>+</sup> Tat-RFP<sup>-</sup> cells  
492 continued to vacate this compartment using both the exit routes to reach the d2EGFP<sup>-</sup> Tat-

493 RFP<sup>-</sup> compartment such that on Day 6, 84.3% of the viral strains re-established latency under  
494 the strong viral promoter. Importantly, the cells in the d2EGFP<sup>+</sup> RFP<sup>+</sup> compartment, unlike  
495 those of the d2GFP<sup>+</sup> Tat-RFP<sup>-</sup> compartment, appeared to move to latency only in one  
496 direction to the d2EGFP<sup>-</sup> Tat-RFP<sup>+</sup> compartment (Figures 7B, top panel; Day 3 and 7E). The  
497 relative proportion of the cells present in the d2EGFP<sup>-</sup> Tat-RFP<sup>+</sup> compartment was  
498 significantly higher than that of the d2EGFP<sup>+</sup> Tat-RFP<sup>+</sup> compartment at time points after Day  
499 1 alluding to the unidirectional movement of these cells to latency. Importantly, the d2EGFP<sup>-</sup>  
500 Tat-RFP<sup>+</sup> compartment is unique since this quadrant represents the proviruses that have  
501 ‘recently’ switched off transcription, with significant levels of physiological Tat still  
502 persistent in the system as indicated by the RFP<sup>+</sup> phenotype. The proviruses of the d2EGFP<sup>-</sup>  
503 Tat-RFP<sup>+</sup> compartment also transited to latency only in one direction and entered d2EGFP<sup>-</sup>  
504 Tat-RFP<sup>-</sup> compartment (Figure 7B, top panel; Day 5 and 7F).

505

506 In contrast, the 1-κB LTR predominantly displayed the Tat-independent transactivation  
507 (Figure 7B, bottom panel). Although approximately 4% of these cells expressed Tat-RFP at a  
508 Shield1 concentration of 3 μM, the Tat-RFP expression was delayed by 24 h, as compared to  
509 that of the 3-κB LTR, with the Tat-RFP expression reaching a peak only on D3. Importantly,  
510 despite the presence of Tat, these dual-positive cells of 1-κB LTR (d2EGFP<sup>+</sup> Tat-RFP<sup>+</sup>) did  
511 not move forward to the d2EGFP<sup>-</sup> Tat-RFP<sup>+</sup> compartment, unlike those of 3-κB LTR, but  
512 returned to the d2EGFP<sup>+</sup> Tat-RFP<sup>-</sup> quadrant (Figure 7B, bottom panel; Day 3). The proviruses  
513 activated by Tat-independent transactivation primarily manifested the d2EGFP<sup>+</sup> Tat-RFP<sup>-</sup>  
514 phenotype, and these viruses returned to latency by switching off the d2EGFP expression and  
515 typically not inducing Tat-RFP expression. While a large majority of 3-κB LTR viral strains  
516 and nearly all the viral strains of 1-κB LTR followed this route of latency, a smaller  
517 proportion of proviruses of 3-κB LTR moved forward activated by Tat-dependent

518 transactivation that manifested the d2EGFP<sup>+</sup> Tat-RFP<sup>+</sup> phenotype. Approximately 14% of the  
519 3-κB LTR viral strains were activated by the Tat-dependent transactivation that followed a  
520 unidirectional trajectory to latency via the d2EGFP<sup>+</sup> Tat-RFP<sup>+</sup> and d2GFP<sup>-</sup> Tat-RFP<sup>+</sup>  
521 compartments. In contrast, approximately, only 1% of 1-κB LTR viral strains could follow  
522 the Tat-dependent transactivation, while the remainder induced only by the Tat-independent  
523 activation and returning to latency directly from the d2EGFP<sup>+</sup> Tat-RFP<sup>-</sup> compartment. Thus,  
524 the transcriptional strength of the viral promoter appears to play a critical role in not only  
525 regulating the activation of viral gene expression but also the latency kinetics and whether or  
526 not Tat-dependent transactivation is recruited to the LTR. Only the strong 3-κB LTR, but not  
527 the weak 1-κB LTR, could successfully undergo Tat-dependent transactivation. The major  
528 routes of entry into latency (Tat-dependent or Tat-independent) exhibited by the two LTR  
529 variants are shown in solid-black arrows, while their less dominant trajectories are indicated  
530 in dotted-black arrows in Figure 7B. Individual trajectories of the percentages of the four  
531 distinct fluorescent populations are presented (Figures 7C, 7D, 7E, and 7F).

532

533 Interestingly, a clear demarcation in the profiles of the weak and strong LTRs is evident at  
534 the level of the Tat-independent transactivation – in the Tat-RFP negative cell populations  
535 (Figures 7C and 7F). The d2EGFP<sup>+</sup> Tat-RFP<sup>-</sup> cells of the 3-κB LTR down-regulated d2EGFP  
536 at all the concentrations of Shield1 by D4. In contrast, latency establishment in the same  
537 population of the 1-κB LTR was incomplete, and nearly half of these cells remained  
538 d2EGFP<sup>+</sup> on D6. This was primarily because a subset of the d2EGFP<sup>+</sup> Tat-RFP<sup>-</sup> cells at the  
539 later time points (D1 and beyond) followed the Tat-dependent route to latency in the case of  
540 the strong 3-κB, but not the weak 1-κB promoter. Therefore, from the data of the TTF model,  
541 it appears that Tat-dependent transactivation can silence the promoter at a faster rate as  
542 compared to that of the Tat-independent pathway. Further, the kinetics of percent d2EGFP<sup>+</sup>

543 to d2EGFP<sup>-</sup> transition, irrespective of the Tat-RFP expression, demonstrated an identical  
544 pattern of promoter silencing in the TTF model with the strong promoter (3-κB) facilitating a  
545 faster rate of silencing compared to the weak promoter (1-κB) when compared with the ATF  
546 model (3- and 4- κB vs. 2-, 1- and 0-κB LTRs). At all the concentrations of Shield1, the  
547 strong 3-κB LTR switched off faster than the weak 1-κB LTR. Thus, the data obtained from  
548 the TTF model are strongly suggestive that the transcriptional strength of the HIV-1 LTR  
549 plays a critical role in controlling viral latency as a validation of the ATF model. A strong  
550 LTR is not only faster in establishing viral latency but also is rapid in revival kinetics from  
551 latency, whereas a weak viral promoter appears to be restricted in both the functions.

552

### 553 **A sustained presence of Tat in the nucleus following the LTR switch-off**

554 The latency kinetics of two different cellular models (ATF and TTF) alluded to the direct  
555 involvement of Tat in the transcriptional suppression of the viral promoter, in a  
556 concentration-dependent manner. Furthermore, we could detect the presence of Tat-RFP  
557 fusion protein in cells harboring a transcriptionally silent provirus (d2EGFP<sup>-</sup> Tat-RFP<sup>+</sup>)  
558 containing a strong viral promoter (3-κB-LTR) (Figure 7). Therefore, it was necessary to  
559 evaluate the physiological levels and the relative distribution of Tat in cells concomitant with  
560 LTR-silencing. To this end, we tracked the expression pattern of the Tat protein in Jurkat  
561 cells using indirect immunofluorescence while the cells transited from the ‘ON’ to the ‘OFF’  
562 state. Jurkat cells infected with the J-cLdGIT-3-κB viral strain encoding d2EGFP (ATF  
563 model) were monitored at 4 - day intervals up to day 16 for d2EGFP expression using flow  
564 cytometry (Figure 8A, left panel). At Day 0, the d2EGFP<sup>High</sup> cells were sorted and subjected  
565 to indirect immunofluorescence for Tat at different points (D0, D4, D8, D12, D14, and D16)

566 (Figure 8A, right panel). A combination of a high-titer, polyclonal, rabbit anti-Tat primary  
567 antibody, and an anti-rabbit, Alexa-568 conjugated secondary antibody was used in the assay.  
568  
569 d2EGFP expression analysis by flow cytometry found a progressive downregulation of the  
570 fluorescence, and by D8 and D16, only 6.9% and 1% of the cells, respectively, remained  
571 positive. The profile of d2EGFP expression of individual cells captured by confocal  
572 microscopy was perfectly consistent with that of the flow analysis; and, visible fluorescence  
573 could not be detected at D8 and beyond. However, trace levels of Tat expression as  
574 determined by the indirect immunofluorescence of Tat (Tat-Alexa 568 signal) could be  
575 visually noted above the background on D12 and D16 despite the complete downregulation  
576 of d2EGFP, indicating the sustained presence of Tat in an LTR-OFF context. Of note, Tat  
577 expression was found in two different compartments of the cells, nuclear and extra-nuclear,  
578 the latter mostly localized to the cell membrane. Fluorescent intensities of d2EGFP  
579 expression, as well as that of Tat-Alexa 568, were determined independently in the nuclear  
580 and the extra-nuclear compartments of 150 individual cells, at all the time points (Figure 8B).  
581 The threshold levels of fluorescent protein expression were determined by using uninfected  
582 Jurkat cell control for d2EGFP (Lane-8; n = 10) and no-primary antibody control for Tat  
583 (Lane-6; n = 10). Importantly, while the fluorescence of d2EGFP reduced progressively with  
584 time and fell below the threshold by D12 representing the establishment of latency, the  
585 fluorescence of Tat, in either compartment, did not drop below the Tat-Alexa 568 threshold  
586 even at D16. The slopes of reduction of the Tat intensities during the initial phases (D0 to  
587 D4) of latency-establishment were estimated to be  $-74.54 \pm 16.8$  and  $-37.28 \pm 3.2$  in the  
588 extra-nuclear and nuclear compartments, respectively. At the later time points (D8, D12, and  
589 D16), there was only a moderate reduction in the Tat levels in either of the compartments.  
590 The data are thus suggestive of a higher level of stability of Tat in the nucleus with possible



591 implications for HIV latency. Importantly, the data of Tat-immunofluorescence are in perfect  
592 agreement with the results of the TTF model, where the few d2EGFP<sup>-</sup> Tat-RFP<sup>+</sup> cells at the  
593 later stages of promoter-silencing indicated sustained presence of low-levels of Tat molecules  
594 in the LTR-switched OFF cells (Figure 7B; top panel). In summary, immunofluorescence not  
595 only detected the presence of Tat in the latently infected cells as late as D16 post-sorting but  
596 also demonstrated a rapid loss of Tat from the extra-nuclear compartment while its relative  
597 stability in the nucleus.

598

599 **The in situ proximity ligation assay (PLA) detects the presence of Tat in the latently**  
600 **infected cells.**

601 In indirect immunofluorescence, the over-all intensity of the Tat at D12, D14, and D16 in  
602 both the cellular compartments was only marginally above the background level. To increase  
603 the sensitivity and detect limited quantities of Tat in the ‘LTR OFF’ cells, we used the highly  
604 sensitive proximity ligation assay (PLA), which conjugates immunostaining with the rolling-  
605 circle replication and outperforms the traditional immune assays in sensitivity to detect trace  
606 amounts of endogenous proteins (30, 31). We optimized Tat-PLA in HEK293T cells using a  
607 pair of anti-Tat primary antibodies raised in different hosts (rabbit and mouse). Since PLA  
608 does not work well in non-adherent cells, and our attempts to adapt the protocol to the Jurkat  
609 cells were not successful, we used HEK293/HEK293T cells in this assay. Using sub-genomic  
610 viral vectors encoding Tat representing HIV-1B (pLGIT) or HIV-1C (pcLGIT), we optimized  
611 PLA (Figures 9A and 9B). The B-Tat protein could be detected as distinct white dots as  
612 opposed to sparse dots in no-antibody and single antibody controls (Figure 9A). Moreover, a  
613 dose-response in the intensity of PLA dots and plasmid concentration, as well as a good

614 correlation between the PLA dot number and GFP MFI, are evident in the case C-Tat (Figure  
615 9B).

616 Using the optimized PLA protocol for Tat, we asked if the Tat protein could be detected in  
617 d2EGFP OFF cells. To this end, HEK293 cells stably and independently infected with the 4-  
618 and the 3-κB variants of the ATF-cLdGIT panel were sorted for the d2EGFP<sup>High</sup> cells. After a  
619 week of incubation following the enrichment, approximately 50% of the cells expressed  
620 d2EGFP, and the cell pool contained both active (d2EGFP<sup>+</sup>) and latent (d2EGFP<sup>-</sup>) cell  
621 clusters. Tat-PLA was then performed using the mixed d2EGFP pool corresponding to both  
622 the strong LTR (3- and 4-κB) variants to quantitate the Tat-PLA signals in the alternate  
623 phenotypes (active and latent). The cells stained with either of the antibodies alone did not  
624 show any Tat-specific signals confirming the specificity of the assay (Figure 9C left panel,  
625 top two lanes). Tat-specific staining was evident only in the presence of both the antibodies  
626 not only in the d2EGFP<sup>+</sup> cells but also in the d2EGFP<sup>-</sup> cells (Figure 9C left panel; bottom two  
627 lanes). The average number of Tat-PLA dots per cell was determined in a total of 164  
628 d2GFP<sup>+</sup> cells (128 and 36 cells for 4-κB and 3-κB variants, respectively) and 168 d2EGFP<sup>-</sup>  
629 cells (123 and 45 cells for 4-κB and 3-κB variants, respectively) comprising of three  
630 independent experiments (Figure 9C; right panel). These values were found to be  $3.35 \pm 0.77$   
631 and  $2.8 \pm 0.59$  for d2EGFP<sup>+</sup> and d2EGFP<sup>-</sup> cells, respectively, although the difference was not  
632 significant statistically. The Tat-PLA data in HEK293 cells confirmed the presence of Tat in  
633 the latent cells at a concentration comparable to that of active viral transcription.

634

635 **Differential occupancy of cellular complexes on active and silent LTRs of bimodal**  
636 **clones.**

637 Burnett JC et al. examined the differential occupancy of NF- $\kappa$ B factors (p50 and p65) at each  
638 of the two identical NF- $\kappa$ B motifs (I and II) in HIV-1B LTR by introducing inactivation  
639 mutations into each of these sites individually and the corresponding impact on the  
640 transcriptional activity (26). A similar examination at the C-LTR has not been performed. A  
641 previous report from our laboratory demonstrated that NFAT1 and 2 proteins could be  
642 recruited to the C- $\kappa$ B motif, the variant NF- $\kappa$ B motif unique for HIV-1C, with an affinity  
643 superior to that of the canonical H- $\kappa$ B site (32). We attempted to compare the identity of the  
644 transcription factors and other host factors binding to the viral promoter between the active  
645 and suppressed states under identical experimental conditions.

646 Having demonstrated the presence of Tat in the cells containing the latent provirus in both the  
647 TTF (Figure 7), and ATF (Figures 8 and 9) models by flow cytometry and confocal imaging,  
648 respectively, we, next asked if Tat in these cells is recruited to the latent viral promoter. We  
649 sorted the d2EGFP<sup>High</sup> and d2EGFP<sup>Low</sup> cell populations from the two clonal cell populations and  
650 using the chromatin immunoprecipitation assay, we examined for the presence of several  
651 essential host factors or epigenetic marks (Rel family members- p50, p65; NFAT1 and  
652 NFAT2; RNA polymerase Ser2 phosphorylation, and Histone 3 lysine 9 trimethylation), as  
653 well as Tat in the chromatin preparations of the active and latent cells. The ChIP assays were  
654 performed by amplifying a 240 bp fragment spanning the enhancer-core promoter region in  
655 the LTR using a semi-quantitative PCR and also using an independent Taqman probe-based  
656 real-time PCR amplifying a 127 bp region spanning the NF- $\kappa$ B and Sp1 sites in the LTR  
657 (Figure 10A).

658 The comparative analysis of the nature of the host factors recruited between the active and  
659 latent promoters was highly reproducible and consistent between the 4- and 3- $\kappa$ B LTRs  
660 (Figures 10C, 10D, 10F, and 10G). While the transcription promoting host factors, p65 and

661 NFAT2, and epigenetic marks RNA Pol II S2, were found associated with the active viral  
662 promoters at significantly higher levels, the transcription repressive factors, p50, NFAT1, and  
663 epigenetic marks H3K9Me3 were preferentially associated with the latent viral promoters.  
664 That the p50-p65 heterodimer is transcription-promoting, the presence of a significantly  
665 higher concentration of p65 at the active promoter is expected (33-35). On the other hand, the  
666 preferential association of p50 with the latent promoter is suggestive of the formation of the  
667 p50 homodimer, a known transcription suppressor (36). Similarly, our data are also in  
668 agreement with the previous reports regarding the transcription suppressive and supportive  
669 functions of NFAT1 and NFAT2, respectively (37-39).

670 The most crucial finding of the present study is the detection of the association of the Tat  
671 protein with the latent LTR. The Tat protein was found associated with the latent 4- $\kappa$ B and 3-  
672  $\kappa$ B promoters at levels 1.7- and 3-folds lower, respectively, as compared to their active  
673 counterparts. The results were reproducible and consistent in the semi-quantitative PCR-  
674 based ChIP analyses between the two strong viral promoters (Figures 10C and 10F). The data  
675 were also consistent between the conventional and the quantitative real-time PCRs performed  
676 following immunoprecipitation (Figures 10D and 10G). To the best of our knowledge, the  
677 present study is the first one to demonstrate the association of Tat with the latent LTR. The  
678 above ChIP data were generated using a commercial rabbit polyclonal anti-Tat antibody (Cat  
679 # ab43014, Abcam). The data were also reproducible when two additional mouse monoclonal  
680 anti-Tat antibodies targeting different epitopes in Tat (Cat # 7377 and # 4374, NIH AIDS  
681 reagent program, Maryland, USA) were used in the assay (Figure 10H). All the three  
682 different anti-Tat antibodies furnished positive ChIP signals for Tat at both the latent viral  
683 promoters (3- and 4- $\kappa$ B), over and above the respective IgG-isotype controls.

684

685 **Discussion**

686 **The significance of Tat recruitment to the latent LTR:**

687 The primary finding of the present work is the identification of a positive correlation between  
688 the transcriptional strength of the LTR and faster latency kinetics via the mediation of  
689 proportionately enhanced Tat concentration. We found that at the time of commitment  
690 towards latency and at subsequent time points, the intracellular concentration of Tat is not a  
691 limiting factor, thus, ruling out the possibility that the limiting levels of Tat underlie latency  
692 establishment. To exert a positive or negative influence on the LTR, Tat must be present in  
693 the nucleus and recruited to the viral promoter. Using three different experimental strategies,  
694 the flow analysis of the Tat-RFP fusion protein (Figure 7), indirect immunofluorescence  
695 (Figure 8, and a proximity ligation assay (Figure 9C), we successfully demonstrated the  
696 presence of Tat in the nucleus of the latent cell, through the successive stages of latency  
697 establishment. The presence of Tat could be detected in both the nuclear and cytoplasmic  
698 compartments by confocal microscopy. Additionally, using ChIP, we could ascertain the  
699 recruitment of Tat to the latent LTR using three different anti-Tat antibodies, although Tat  
700 levels in the latent nuclei were typically inferior to those of the active nuclei (Figure 10).  
701 Furthermore, a weak but discernible signal of the Tat-transcripts was evident in the latent  
702 fractions of the bimodal clones of both the strong LTRs used in the assay (Figures 5F and 5J).  
703 All these data are strongly suggestive that Tat plays a direct role in promoting latency.  
704 Unfortunately, our attempts at adopting PLA to suspension cells were not successful. How  
705 Tat is recruited to the chromatin complex needs to be determined. A few studies previously  
706 showed the direct binding of Tat to extrachromosomal HIV-1 promoter and proviral DNA  
707 (40, 41); however, the tethering of Tat to the nascent TAR element, as a part of the paused  
708 RNA PolII complex proximal to the latent promoter (42), is a more likely possibility.

709

710 **The underlying mechanisms regulating HIV-1 latency remain enigmatic:**

711 There have been several attempts to understand HIV-1 latency as this question contains direct  
712 relevance for clinical management and viral purging (43). The complexity of HIV-1 latency  
713 has led to two distinct schools of thought to explain the phenomenon - the hypothesis of  
714 ‘epiphenomenon’ where the host environmental factors including the epigenetic  
715 modifications play the deterministic role (1, 44), and that of ‘viral circuitry’ where decision  
716 making is hardwired in the intrinsic Tat-LTR regulatory circuit (7, 9). The two models, which  
717 need not necessarily be mutually exclusive, have been supported by considerable  
718 experimental evidence but also have specific limitations.

719

720 Experimental evidence for epigenetic modifications controlling HIV-1 latency is available  
721 from studies using clonal cell populations typically harboring sub-genomic viral reporter  
722 vectors (45). The major limitation of this experimental model is the prolonged periods  
723 required for the cells to establish latency. The majority of individual clonal populations reach  
724 50% of latency on an average in 30 to 80 days, which probably is not representative of the  
725 kinetics of natural latency. Given the cytotoxic properties of the viral products and the  
726 immune response, and a relatively short life-span of infected T cells (~ 2.2 days) (46), viral  
727 gene expression is expected to drive viral evolution towards rapid, not prolonged, latency  
728 establishment, in natural infection. Additionally, it is also not understood how epigenetic  
729 silencing of an active viral promoter is ever achieved, especially in the presence of abundant  
730 quantities of Tat.

731

732 The contrasting model explaining HIV-1 latency based on the intrinsic and virus-driven  
733 stochastic phenomenon is also supported by compelling experimental evidence (7, 9). The  
734 ‘feedback-resistor’ module (12), considers a single type of chemical modification,

735 acetylation, and deacetylation, of Tat, serving as the ‘resistor’ or dissipater of the positive  
736 transcription loop to ensure a stable latent state. The model doesn’t take into account several  
737 other PTMs of Tat. Whereas di-methylation of the lysine residues at positions 50 and 51 (47)  
738 and the arginine residues at positions 52 and 53 (48) can suppress Tat-transactivation, mono-  
739 methylation of the lysine residues shows the opposite effect (49). Importantly, methylated Tat  
740 is expected to have enhanced cellular stability with implications for latency (50). In addition  
741 to acetylation, the phosphorylation of multiple serine and threonine residues can  
742 cooperatively enhance Tat transactivation (51, 52). Polyubiquitination of Tat can also  
743 enhance the stability of Tat, thereby augmenting its transactivation function (53). Apart from  
744 the chemical modifications, Tat is also known to be inactivated by the propensity of the  
745 protein to make dimer and multimer forms, although experimental evidence is scanty in this  
746 regard (54). Furthermore, the differential forward and reverse reaction kinetics of Tat  
747 acetylation have been evaluated only in HeLa cells, but not in cells of physiological relevance  
748 to HIV-1 infection (55). Weinberger et al., also analyzed the feedback strength in terms of the  
749 noise autocorrelation function and demonstrated that a stronger Tat feedback would yield  
750 transcriptional pulses of longer durations leading to cell lysis while the weaker Tat feedback  
751 and the Tat-independent transcription would generate shorter transcriptional pulses leading to  
752 latency (8). The model, however, doesn’t reconcile to the fact that a small proportion of T  
753 cells can still escape cell death following Tat-mediated transcription and establish a viral  
754 reservoir (56). In summary, despite significant experimental evidence, the question regarding  
755 the critical deterministic factor(s) regulating HIV-1 latency remains unresolved.

756

### 757 **Subtype-associated molecular features may offer vital clues to HIV-1 latency:**

758 Although the fundamental constitution of the HIV-1 promoter is highly conserved among the  
759 various genetic subtypes of HIV-1, there exist many subtype-specific molecular features that

760 may modulate gene expression considerably. Such differences are evident in the copy-  
761 number and nucleotide sequences of different TFBS especially those of USF, c-Myb, LEF-1,  
762 Ets1, NF-AT, Ap-1, NF- $\kappa$ B, and Sp1 binding sites, and regulatory elements such as the  
763 TATA box and the TAR element (57-59). These regulatory elements play critical roles in  
764 positively regulating the basal and inducible levels of viral transcription (60, 61). Most of the  
765 TFBS, especially the AP-1, USF, NFAT, NF- $\kappa$ B, and Sp-1 motifs also play a critical role in  
766 regulating viral latency by recruiting chromatin-modifying complexes and transcription  
767 suppressing factors such as the histone deacetylases (HDACs) to the viral promoter (62-66).

768

769 Of the various TFBS, both NF- $\kappa$ B and Sp-1 motifs are represented by multiple and tandem  
770 binding sites in the LTR, and, play crucial roles in regulating gene expression and latency  
771 (36, 67-69). The most striking feature in the HIV-1C LTR is the copy-number difference of  
772 NF- $\kappa$ B motifs, the sequence variation of the additional  $\kappa$ B motifs (25), and the associated  
773 sequence variation of the Sp1III site (32). We demonstrated previously that NF- $\kappa$ B site  
774 duplication is unique for HIV-1C not recapitulated by any other HIV-1 genetic family.  
775 Importantly, in HIV-1C, a unique NF- $\kappa$ B motif (the C- $\kappa$ B element, GGGGCGTTCC) and a  
776 genetically distinct and subtype-specific Sp1III site are located at the core of the promoter,  
777 and the two elements establish a functional association in enhancing HIV-1C transcription  
778 (32).

779

780 HIV-1C could serve as an ideal model to ask whether transcriptional strength can affect viral  
781 latency, a property not explored previously probably due to the absence of NF- $\kappa$ B copy-  
782 number variation in non-HIV-1C subtypes. The rapid expansion of the 4- $\kappa$ B viral strains in  
783 India in a short period of ten years, from 2% to 25 – 35%, is quite surprising (25). The ATF  
784 model we used here also demonstrated a perfect positive correlation between the number of



785 NF- $\kappa$ B binding sites in the LTR and the viral transcriptional output in the form of EGFP and  
786 Tat transcripts (Figure 2) suggesting that all the four NF- $\kappa$ B binding sites in the LTR are  
787 functional. In this backdrop, it remains intriguing why HIV-1C strains require enhanced  
788 transcriptional strength, and despite having a strong promoter, how do these viral strains  
789 establish and maintain latency while the other HIV-1 genetic subtypes do not adopt such an  
790 evolutionary strategy.

791

### 792 **Reciprocal binding of host-factors at the active and latent promoters:**

793 Gene expression is the outcome of multiple layers of regulatory events consisting of the *cis*-  
794 acting TFBS and the *trans*-acting chromatin remodelers, viral factors, especially Tat,  
795 epigenetic marks, and a cross-talk between a wide array of proteins, ultimately leading to  
796 diverse phenotypic outcomes. Numerous studies attempted to examine how the nature of the  
797 host factor complexes recruited at the LTR regulates the dynamic switching between the  
798 active and latent states (45, 70). In an elegant analysis, Burnett et al., used PheB cells derived  
799 from the GFP<sup>Mid</sup> parental Jurkat cells (analogous to GFP<sup>Dim</sup> in (7) and GFP<sup>Low</sup> in the present  
800 study) and compared the nature of cellular complexes recruited between transcriptionally  
801 active and latent cells (26). This study demonstrated a non-overlapping function of the two  
802 genetically identical NF- $\kappa$ B sites in regulating transcriptional activation versus suppression.  
803 We employed a similar experimental strategy with the exception that we used the EGFP<sup>High</sup>  
804 clonal cell populations (the bimodallers, Figure 5B) that manifested a bimodal phenotype of  
805 EGFP expression. The EGFP<sup>High</sup> and the EGFP<sup>Low</sup> subsets of bimodal cell clones offered a  
806 significant technical advantage of normalizing the inherent differences in cellular parameters.  
807  
808 The preferential binding of p50 and p65 (RelA) at the latent and active promoters ascertained  
809 the repressive and inducing functions of p50-p50 homodimer and p50-RelA heterodimer

810 respectively, of HIV-1 transcription (Figure 10) (26, 35, 36). Unlike the NF- $\kappa$ B proteins, the  
811 impact of individual NFAT members on HIV-1 latency has not been examined in great detail.  
812 To the best of the knowledge, the present study is the first to demonstrate a reciprocal binding  
813 pattern of NFAT1 and NFAT2 at the active and latent promoters, respectively, in the context  
814 of clonal cells. Since NF- $\kappa$ B and NFAT factors share overlapping sites (71-73), NFAT may  
815 have a significant influence on latency in HIV-1C. Furthermore, the NF- $\kappa$ B sites in the C-  
816 LTR (F, H, and C- $\kappa$ B sites) are genetically different, adding to the multitude of possible  
817 combinations. Targeted inactivation of each  $\kappa$ B site, one at a time, followed by ChIP, may  
818 provide meaningful insights into the contribution of each  $\kappa$ B sequence to diverse signaling  
819 pathways and HIV-1C latency.

820

821 The key finding of the present study, however, is the detection of the association of the Tat  
822 protein with the latent LTR. The results were highly reproducible and consistent between the  
823 two strong viral promoters (Figure 10). The data were also consistent between the  
824 conventional PCR and the quantitative real-time PCR performed following  
825 immunoprecipitation. The data were reproducible when three different anti-Tat antibodies  
826 targeting different epitopes in Tat were used in the assay. The Tat protein was found  
827 associated with the active 4- $\kappa$ B and 3- $\kappa$ B promoters at 1.7- and 3-folds higher, respectively,  
828 as compared to their latent counterparts. To the best of our knowledge, the present study is  
829 the first one to demonstrate the association of Tat with the latent LTR, albeit at a lower  
830 intensity as compared to the active promoter.

831

832 **The negative feedback circuits represent a powerful and common strategy biological**  
833 **systems exploit to regulate gene expression:**

834 Negative feedback circuits can rapidly switch off signaling cascades; therefore, this mode of  
835 gene regulation represents the most common strategy biological systems exploit to regulate  
836 gene expression (74). Molecules of biological significance controlling powerful signaling  
837 cascades such as cytokines and transcription factors, often attenuate their own production  
838 using negative feedback loops. The transcription factor NF- $\kappa$ B that controls the expression of  
839 numerous cellular factors that regulate a wide variety of cellular processes, down-regulates  
840 self-expression by activating the inhibitor protein I $\kappa$ B $\alpha$  (75). Likewise, interleukin-2 (IL-2),  
841 the most potent cytokine that regulates T cell viability and proliferation, limits self-  
842 production by activating the expression of a FOXP3-mediated negative feedback loop (76).  
843 Given that the latency establishment is central for HIV-1 survival towards evading immune  
844 surveillance and minimizing cytotoxicity, an active molecular mechanism would be  
845 necessary to suppress gene expression from the LTR rapidly. The decision making to achieve  
846 such a critical phase of the viral life cycle must be an intrinsic characteristic of the MTRC of  
847 the virus; it couldn't be left to stochastic phenomena or epiphenomena regulated by cellular  
848 events. That the MTRC of HIV-1 comprises of only two elements – the LTR and Tat, and  
849 that the latter is the only factor encoded by the virus, Tat is the viral factor best positioned to  
850 regulate viral transcription and transcriptional silence both, perhaps at different phases of the  
851 viral life cycle following integration. Data presented here using two different latency cell  
852 models are not only consistent with this critical biological function ascribed to Tat but also  
853 provide additional information on latency. In the present work, we examined the latency  
854 profile only in the context of HIV-1C, and its validity must be examined in other genetic  
855 families of HIV-1.

856

857 Based on several facts, the master regulator of the virus is well-positioned to be a potential  
858 candidate to impose negative feedback on the LTR, in a temporal fashion; including the

859 absence of a known transcription suppressor encoded by the virus, the ability of Tat to  
860 constitute the master regulatory circuit of the virus in combination with the LTR in the  
861 absence of other viral factors, the presence of Tat in the latent cell detected reproducibly and  
862 also recruited to the latent promoter, and the identification of a positive correlation between  
863 the transcriptional strength of the LTR and the rate of latency establishment.

864

### 865 **A Tat-dependent negative feedback mechanism to establish latency?**

866 Based on the present study, we propose a novel model for the transcriptional repression of  
867 HIV-1 through a Tat-negative feedback mechanism. The attenuation of Tat-positive feedback  
868 signaling has been proposed to cause the LTR silencing, triggered by extracellular cues  
869 (deterministic model) or limiting Tat levels probabilistically (stochastic model) (7, 8, 12, 26).  
870 In either case, Tat concentration gradually falls below a threshold insufficient for self-  
871 renewal or successful transcriptional elongation.

872

873 Our data allude to a concentration-dependent inter-conversion of the active form of Tat to a  
874 repressive form, the latter competing with the former, strengthening a negative-feedback  
875 circuit leading to the rapid silencing of the promoter (Figure 11). We propose that the  
876 autonomous Tat-feedback loop initially favors the steady accumulation of Tat molecules to  
877 enhance transcription. Subsequently, at a point when Tat intracellular concentration surpasses  
878 a specific threshold level, Tat switches to the suppression mode down-regulating  
879 transcription, possibly depending on differential PTM modifications of Tat itself. Hence, our  
880 model proposes that the strong promoters (3- and 4-κB LTRs) characterized by a stronger  
881 Tat-feedback, can initiate a rapid transcriptional silence as compared to the weak promoters  
882 (2-, 1- and 0-κB LTRs).

883

884 Our data raises several important questions related to HIV-1C latency, which were beyond  
885 the scope of the present study. Is the LTR of HIV-1C likely to continue to acquire additional  
886 copies of NF- $\kappa$ B and/or other transcription factor binding sites to augment transcriptional  
887 strength further? Of note, unpublished data from our laboratory (Bhange D et al, unpublished  
888 data) demonstrate a recent trend of emergence of at least 10 different types of TFBS variant  
889 HIV strains in India. Further, how the variant NF- $\kappa$ B motifs unique for HIV-1C modulate  
890 viral latency? Answers to these questions will shed light on the mechanism of HIV-1 latency  
891 and likely to help design novel therapeutic strategies to purge HIV infection.

892

893 We acknowledge a few technical limitations of the present work that were beyond our  
894 control. Our attempts to extend the observations to full-length HIV-1C molecular clones were  
895 not successful for two main reasons- (1) the lack of good molecular clones representing HIV-  
896 1C (only four molecular clones of HIV-1C are available). (2) Additionally, unlike NL4-3, an  
897 HIV-1B molecular clone mostly used in the field, the few available HIV-1C clones do not  
898 lend themselves for significant molecular manipulation of any kind; the in vitro infection  
899 property of the HIV-1C viral strains is significantly low compared to other subtypes (please  
900 see a recent review (77), which highlights this problem of HIV-1C explicitly), Further, the  
901 engineering of a fluorescent protein as a reporter will make these clones nearly unviable. Our  
902 data were derived from Jurkat cell infection- the most popular cell model in the field (26, 45,  
903 78-81). Latently infected primary cells in vivo are extremely rare in the order of  $10^{-6}$  (1), and  
904 it would be a daunting task to isolate Tat from such a small population. Further, to examine  
905 latency establishment in primary cells, a stable cell pool must be generated, reactivated. Such  
906 manipulations in primary cells would require at least 6 to 8 weeks, a time frame not  
907 conducive to sustaining primary cells in culture. Primary cell models have traditionally been  
908 used to examine latency reversal and to evaluate latency-reversing agents but rarely to study

909 latency establishment. A suitable, long-lasting primary cell-based model to study the  
910 mechanisms involving HIV-1 latency establishment is an absolute requirement, and we have  
911 been optimizing this model in our laboratory for future studies. Additionally, we have been  
912 raising antibodies specific to defined PTM of Tat to investigate how Tat-PTM may modulate  
913 HIV-1 latency.

914

## 915 **Materials and Methods**

### 916 **Cell culture**

917 Jurkat cells were maintained in RPMI 1640 medium (R4130, Sigma-Aldrich, St. Louis, USA)  
918 supplemented with 10% fetal bovine serum (RM10435, HiMedia Laboratories, Mumbai,  
919 India), 2 mM glutamine (G8540, Sigma-Aldrich), 100 units/ml penicillin G (P3032, Sigma-  
920 Aldrich) and 100 g/ml streptomycin (S9137, Sigma-Aldrich).

921 The human embryonic kidney cell lines HEK293 and HEK293T were cultured in Dulbecco's  
922 modified Eagle's medium (D1152, Sigma-Aldrich) supplemented with 10% FBS. All the  
923 cells were incubated at 37<sup>0</sup>C in the presence of 5% CO<sub>2</sub>.

924

### 925 **Design and construction of HIV-1C reporter vector panels**

926 **Autonomous Tat-feedback (ATF) model:** The pLGIT reporter vector (HIV-1 LTR-EGFP-  
927 IRES-Tat; (7) ) was a kind gift from Dr. David Schaffer (University of California, USA), in  
928 which the two different elements, the 3'LTR, and Tat, were of HIV-1B origin (NL4-3). We  
929 substituted these two elements with analogous counterparts of HIV-1C origin (Indie\_C1-  
930 Genbank accession number AB023804) and referred to the vector as pLGIT (cLTR-EGFP-  
931 IRES-cTat; (32)). Using the pLGIT backbone, we constructed a panel of five reporter  
932 vectors containing varying copies of functional NF-κB motifs, ranging from 0 to 4 (the p911a

933 vector series). First, an LTR containing four tandem NF- $\kappa$ B motifs (FHHC-LTR; H-  
934 GGGACTTTCC, C- GGGGCGTTCC, F- GGGACTTTCT; variations among the  $\kappa$ B-motifs  
935 underlined), was generated in an overlap-PCR using the LTR of Indie\_C1 as the template.  
936 The additional 22 bp sequence constituting the F- $\kappa$ B motif was adopted from the HIV-1C  
937 molecular clone BL42-02 (GenBank accession No. HQ202921). The amplified FHHC-LTR  
938 was inserted into pcLGIT vector, substituting the original 3'-LTR. Subsequently, using the  
939 overlap-PCR, inactivating point mutations were introduced sequentially into the 'FHHC' (4-  
940  $\kappa$ B) LTR, to generate the other members of the panel: OHHC (3- $\kappa$ B), OOHHC (2- $\kappa$ B), OOOHC  
941 (1-  $\kappa$ B) and OOOO (0- $\kappa$ B) (Figure 2A). Of note, the inactivation mutations only introduced  
942 base substitutions, not deletions, keeping the length of the viral promoter constant among the  
943 variant viral vectors. The mutated  $\kappa$ B-motif 'O' contains the sequence TCTACTTTTT  
944 (underlined bases represent inactivating mutations). The variant LTR fragments were cloned  
945 directionally between the XhoI and PmeI sites present on the outer primers- N1990 FP (5'-  
946 GCGTACCTCGAGTGGAAGGGTTAATTTACTCCAAGAAAAGGC-3') and N1991 RP  
947 (5'-TATGTCGTTTAAACCTGCTAGAGATTTTCCACACTACCAAAGGGTCTGAG-3')  
948 thus, substituting the original 3'-LTR of pcLGIT. Therefore, the members of the vector panel  
949 are genetically identical except for the differences in the functional NF- $\kappa$ B motifs in the LTR.  
950 The internal primer sequences to generate the point mutations in the LTR variants are  
951 mentioned in Table 1. The 3' LTR sequences of all the panel members were sequence-  
952 confirmed, and the expression of EGFP was ascertained in HEK293T cells.

953

954 A second panel of the five variant viral vectors, analogous to the p911a panel was also  
955 constructed using the pcLdGIT backbone, where EGFP was substituted with d2EGFP, a  
956 variant form of the fluorescent protein characterized by the shorter half-life (p911b vector

957 series). First, the d2EGFP ORF was amplified from the pCAG-GFPd2 plasmid (#14760,  
958 Addgene, Massachusetts, USA) using the primer pair- N1142 FP (5'-  
959 CAGGAATTCGATGCTACCGGTCGCCACCATG-3') and N1143 RP (5'-  
960 TCCTACTAGTAGGATCTGAGTCCGGACTACACATTGATCC-3') and directionally  
961 cloned between the AgeI and BspEI sites to replace the EGFP with the d2EGFP reporter  
962 gene in the pcLGIT backbone. To generate the p911b panel, the variant LTRs of the p911a  
963 panel were transferred directionally to the pcLdGIT vector backbone between the PmeI and  
964 XhoI sites, thus substituting the original 3'-LTR. The expression of d2EGFP from all the  
965 vectors of the p911b panel was verified using HEK293T cells.

966

967 **Tunable Tat-feedback (TTF) model:** In the TTF model, HIV-1C LTR regulates the co-  
968 expression of d2EGFP and Tat-RFP fusion protein from the vector pcLdGITRD (cLTR-  
969 d2EGFP-IRES-cTat:RFP:DD). The 5' LTR in the pcLdGITRD vector transcribes a single  
970 transcript encoding d2EGFP and a 1,314 bp long fusion cassette separated by an IRES  
971 element. The fusion cassette is a combination of three different ORFs- (i) the cTat expression  
972 segment (BL4-3, GenBank accession number FJ765005.1), (ii) the ORF of DsRed2-RFP, and  
973 (iii) the FKBP destabilization domain (DD) (28). The three components of the 'Tat:RFP:DD'  
974 cassette were independently amplified using appropriate templates and primers, and, finally,  
975 using an overlap PCR, the fusion ORF was generated (primer sequences provided in Table 1).  
976 The Tat ORF from the pcLdGIT-3-κB vector (p911b series; ATF model) was replaced with  
977 the 'Tat:RFP:DD' ORF, thus, generating the pcLdGITRD-3-κB viral vector. pcLdGITRD-3-  
978 κB was subsequently used as the parental vector to construct the other member-  
979 pcLdGITRD-1-κB of the panel p913 (Figure 6A) by cloning the respective 3'LTRs between



980 PmeI and XhoI in the pcLdGITRD backbone. The d2EGFP expression from the two  
981 members of the panel p913 was confirmed in HEK293T cells.

982

983 **Shield1 dose-dependent Tat:RFP:DD expression from the pcLdGITRD vector (TTF**  
984 **model) in HEK293T cells**

985 The FKBP DD-tag in the pcLdGITRD construct marks the ‘Tat:RFP:DD’ fusion protein for  
986 rapid degradation through the proteasome pathway (28). However, ‘Shield1’, a 750 kD cell-  
987 permeable ligand can bind the DD motif and rescue the fusion cassette from rapid processing  
988 in a dose-responsive manner with minimum off-target effects (29). Thus, by changing the  
989 concentration of Shield1 in the culture medium, the pcLdGITRD construct permits fine-  
990 tuning of the intracellular concentration of Tat without altering the transcriptional strength of  
991 the LTR. To validate the Shield1 dose-dependent Tat:RFP:DD expression, approximately 0.6  
992 million HEK239T cells were transfected with 1 µg pcLdGITRD-3-κB vector in each well of  
993 a 12-well culture dish and treated with varying concentrations (0, 0.5, 1.0, 2.5, 4.0 and to 5.0  
994 µM) of Shield1 (#632189, Takara Clontech). After 48 h of transfection, the expressions of  
995 both DsRed2-RFP and d2EGFP were recorded using a fluorescent microscope.

996

997 **Generation of pseudotyped reporter virus and the estimation of relative infectious units**  
998 **(RIU)**

999 Pseudotyped reporter viruses were generated in HEK293T cells. Each viral vector was  
1000 transfected together with the 3<sup>rd</sup> generation lentiviral packaging vectors using the standard  
1001 calcium phosphate protocol (82). Briefly, a plasmid DNA cocktail consisting of 10 µg of  
1002 individual viral vector (NF-κB motif variants), 5 µg psPAX2 (#11348; NIH AIDS reagent

1003 program, Maryland, USA), 3.5 µg pHEF-VSVG (#4693; NIH AIDS Reagent program) and  
1004 1.5 µg pCMV-rev (#1443; NIH AIDS Reagent program) was transfected in a 100 mm dish  
1005 seeded with HEK293T at 30% cell confluence. pCMV-RFP (0.2 µg) was used as an internal  
1006 control for transfection. Six hours post-transfection, the medium was replenished with  
1007 complete DMEM. Culture supernatants were harvested at 48 h post-transfection, filtered  
1008 using 0.22 µ filter and stored in 1 ml aliquots in a deep freezer for future use.

1009 The RIU of the pseudotyped reporter viruses was quantified in Jurkat T-cells by measuring  
1010 EGFP or d2EGFP expression by flow cytometry. Precisely,  $3 \times 10^4$  Jurkat cells in each well  
1011 of a 12-well tissue culture plate were infected with individual viral stocks serially diluted 2-  
1012 fold (from 10 xd to 80 xd) in a total volume of 1 ml of 10% RPMI containing 25 µg/ml of  
1013 DEAE-Dextran. Six hours post-infection, the cells were washed and replenished with 1 ml of  
1014 complete RPMI. Post 48 h, the cells were activated with a combination of 40 ng/ml PMA  
1015 (P8139, Sigma Aldrich), 40 ng/ml TNF $\alpha$  (T0157, Sigma-Aldrich), 200 nM TSA (T8552,  
1016 Sigma Aldrich) and 2.5 mM HMBA (224235, Sigma-Aldrich) for 18 h, following which the  
1017 percent EGFP<sup>+</sup> or d2EGFP<sup>+</sup> cells were analyzed using a flow cytometer (BD FACSAria III  
1018 sorter, BD biosciences, New Jersey, USA). Following this, titration curves were constructed  
1019 and analyzed for 5-10% infectivity of the cells by regression analysis, which would  
1020 correspond to ~0.05-0.1 RIU. For the TTF model, cells were maintained in 1µM Shield1  
1021 throughout the procedure.

1022

### 1023 **Viral gene-expression analysis**

1024 Viral gene-expression levels were compared among the LTR variant strains of the pcLGIT  
1025 panel (ATF model). Towards this, approximately one million Jurkat cells were infected with  
1026 each viral strain of the panel independently at an RIU of ~0.5–0.6. Three days following

1027 infection, the cells were activated using a cocktail of global T-cell activators (40 ng/ml PMA  
1028 + 40 ng/ml TNF $\alpha$  + 200 nM TSA + 2.5 mM HMBA) and 24 hours following activation,  
1029 EGFP fluorescence (mean fluorescence intensity or MFI) was estimated for both the  
1030 uninduced and activated cells using flow cytometry. Tat transcript levels of the control and  
1031 activated cells, were determined using a Tat RT-PCR (see below). Fold enhancements in  
1032 EGFP, and Tat expression levels were obtained from the ratios of the EGFP-MFI values of  
1033 the activated and control samples and similarly their relative Tat-mRNA values, respectively.

1034 To compare the gene-expression levels from the LTR at different transcriptional strengths of  
1035 Tat-feedback, modulated by the Shield1 concentrations (TTF model), approximately 0.3  
1036 million Jurkat cells in a 35 mm culture dish were infected with the cLdGITRD-3- $\kappa$ B viral  
1037 strain at a p24 equivalent of 20 ng/ml. Twenty-four hours post-infection, the infected cells  
1038 were washed and replenished with complete RPMI. The cells were then equally distributed  
1039 into four wells of a 6-well plate and each well treated with either 0, 0.5, 2.5, or 5.0  $\mu$ M  
1040 Shield1. After 48 hours, half of the cells from each Shield1 treatment were activated using  
1041 the global T-cell activators, and 24 hours later, both the uninduced and activated fractions  
1042 from each dose of Shield1 were subjected to d2EGFP and Tat-transcript expression analysis  
1043 using flow cytometry and RT-PCR, respectively.

1044

#### 1045 **FACS sorting and the generation of stable Jurkat cells and clonal lines**

1046 **ATF model:** Individual, NF- $\kappa$ B variant, pseudotyped viral stocks of the cLGIT/cLdGIT  
1047 panel were added to  $1 \times 10^6$  Jurkat cells in a 35 mm culture dish, at an RIU of ~0.05-0.1 in a  
1048 total volume of 2 ml complete RPMI supplemented with 25  $\mu$ g/ml DEAE-Dextran. After six  
1049 hours of infection, cells were washed to remove DEAE-Dextran and transferred to 5 ml of  
1050 complete RPMI medium in a T-25 flask and maintained under standard culture conditions.

1051 The infected cell pools were expanded over seven days and induced with the global T-cell  
1052 activation cocktail as mentioned above. After 18 h of activation, total EGFP<sup>+</sup> (MFI >10<sup>3</sup>  
1053 RFU), EGFP<sup>High</sup> (MFI >10<sup>4</sup> RFU), or d2EGFP<sup>High</sup> (MFI ~0.5 X 10<sup>3</sup> – 0.5 X 10<sup>4</sup>) cells were  
1054 FACS sorted from respective cell pools depending on the subsequent viral latency assays. A  
1055 small aliquot of the sorted cell population was re-analysed to confirm the purity of the sorted  
1056 cells. Each sorted cell pool with a stable EGFP/d2EGFP expression represented a mixed  
1057 population with random proviral integrations with the corresponding NF-κB variant strain.

1058 Stable clonal cell lines of the cLGIT variant panel (expressing EGFP) were established by  
1059 sorting a single cell per three wells in a 96-well plate. Each well of the collection plate  
1060 contained 100 µl of a mix of equal proportions of complete- and the spent-RPMI media. The  
1061 cells were diluted to a cell density of 0.1 x 10<sup>6</sup>/ml before the sort.

1062

1063 **TTF model:** 1 x 10<sup>6</sup> Jurkat cells were infected with the sub-genomic cLdGITRD viral strains  
1064 (3- and 1-κB variants) at an RIU of ~0.1-0.2 in 1 ml of complete RPMI medium  
1065 supplemented with 25 µg/ml of DEAE-dextran and 1.0 µM Shield1. Six hours post-infection,  
1066 the infected cells (J-cLdGITRD) were washed and replenished with 1 ml of complete RPMI  
1067 supplemented with 1 µM Shield1. Next, 72 h following the infection, the cells were induced  
1068 with the previously mentioned T-cell activation cocktail for 18 h, and following the  
1069 activation, the stable, d2EGFP<sup>+</sup> J-cLdGITRD cells were sorted.

1070

#### 1071 **The analysis of proviral integration frequency**

1072 A Taqman qPCR was used to determine the mean number of proviral integrations per cell  
1073 using the genomic DNA extracted from the stable, J-cLGIT cell pools, and also from the

1074 EGFP<sup>High</sup> and EGFP<sup>-</sup> subfractions corresponding to the representative bimodal clones of the  
1075 3-κB and the 4-κB variants. Genomic DNA was extracted from 1 x 10<sup>6</sup> stable cells using the  
1076 GenElute mammalian genomic DNA kit (G1N350, Sigma-Aldrich) following the  
1077 manufacturer's instructions. The extracted DNA was dissolved in TE, and the concentration  
1078 was adjusted to 70 ng/μl. Five μl of this solution was equivalent to approximately 10<sup>5</sup> copies  
1079 of the human genome. The stock DNA solution was subjected to a 10-fold serial dilution up  
1080 to a final DNA concentration of 10<sup>1</sup> copies/5 μl and used as the template in the PCR. A 129  
1081 bp fragment spanning the R-U5 region of the HIV-1 5' LTR (+18 to +147) was amplified  
1082 using the primer-probe combination N2208 FP, N2209 RP, and N2210 FAM (see Table 1 for  
1083 the primer sequences) in a Taqman real-time PCR. A standard curve was established  
1084 simultaneously using the genomic DNA extracted from the J-Lat 8.4 cells that contain a  
1085 single proviral copy per cell (78). The proviral copy number of the query samples was then  
1086 estimated using the regression analysis.

1087

#### 1088 **Generation of kinetic profiles of latency-establishment**

1089 **ATF model:** Kinetic curves of latency were established to compare the rates of promoter  
1090 silencing among the NF-κB variant strains of the ATF panel. Towards this, the sorted cell  
1091 pools (total EGFP<sup>+</sup>, EGFP<sup>High</sup>, or d2EGFP<sup>High</sup>) were maintained under standard experimental  
1092 conditions while a small aliquot was collected at regular intervals to monitor the  
1093 EGFP/d2EGFP expression using the FACSAria III flow cytometer. Temporal kinetic profiles  
1094 for % GFP<sup>+</sup> cells and GFP-MFI were constructed and compared among the five NF-κB  
1095 variants for the total EGFP<sup>+ve</sup>, EGFP<sup>High</sup> as well as the d2EGFP<sup>High</sup> cells. The EGFP reporter  
1096 gene having a longer half-life (~48 h) was measured every 4 days for 16-24 days while the

1097 analysis of d2EGFP expression with a shorter half-life (~ 2h) was performed every 24 h  
1098 following sorting, for 7 days.

1099 Kinetic profiles of latency were established for the clonal lines of the cLGIT panel. The  
1100 sorted, single EGFP<sup>High</sup> cells corresponding to each NF- $\kappa$ B variant strain were expanded to  
1101 form clonal lines, and 16 such lines corresponding to each cLGIT viral variant were flow-  
1102 analyzed for their EGFP expression profiles on Days 21 and 28 post sorting.

1103

1104 **TTF model:** Latency-establishment profiles at varied strengths of the Tat-feedback circuit  
1105 were studied using the TTF model by altering the Shield1 concentrations in the culture  
1106 medium. The sorted d2EGFP<sup>High</sup> cells corresponding to the cLdGITRD-3- $\kappa$ B (strong) and the  
1107 cLdGITRD-1- $\kappa$ B (weak) LTR variants were divided into four separate fractions and  
1108 maintained at four different concentrations of Shield1 (0, 0.5, 1 and 3  $\mu$ M) under standard  
1109 experimental conditions, while a small aliquot from all the fractions was collected every 24 h  
1110 to monitor the expression of both d2EGFP and Tat-RFP using FACSAria III flow cytometer,  
1111 for 7 days. Temporal kinetic profiles were constructed and compared among the two NF- $\kappa$ B  
1112 variants as well as across the different concentrations of Shield1.

1113

#### 1114 **Live-dead analysis of cells**

1115 A live-dead, viability assay was performed to exclude the dead cells before every flow  
1116 analysis. Cell samples were stained using the LIVE/DEAD<sup>TM</sup> fixable Red Dead Cell Stain Kit  
1117 (#L34972, Molecular Probes, Thermo Fisher Scientific, Massachusetts, USA) following the  
1118 manufacturer's protocol. Briefly, cell samples were harvested in a microcentrifuge tube,  
1119 washed once with 1X PBS, and resuspended in 500  $\mu$ l of 1:1,000 diluted live-dead stain. The

1120 cells were then incubated for 30 mins at room temperature in the dark, following which they  
1121 were washed, resuspended in 500  $\mu$ l of RPMI supplemented with 2% RPMI and analyzed in  
1122 the flow cytometer.

1123

#### 1124 **DNA cell-cycle analysis**

1125 Cell cycle analysis by quantitating DNA content was performed on the EGFP<sup>High</sup> and EGFP<sup>Low</sup>  
1126 subfractions of the bimodal clonal lines of the J-cLGIT-3- and 4- $\kappa$ B variants. The standard  
1127 propidium iodide (PI) staining protocol was followed with slight modifications to minimize  
1128 the quenching of the EGFP signal (83). Briefly,  $1 \times 10^6$  cells were harvested in 1.5 ml  
1129 microcentrifuge tubes and washed once with 1X PBS. The pellets were resuspended  
1130 thoroughly in 1 ml fix solution (2% glucose and 2% paraformaldehyde in 1X PBS) and  
1131 incubated on ice for 10 mins. The cells were then washed once with 1X PBS, resuspended in  
1132 100  $\mu$ l of 1X PBS, and 900  $\mu$ l of ice-cold 70% ethanol added dropwise with gentle vortexing.  
1133 The fixed cells were incubated on ice for 1 h, washed with 1X wash solution (20 mM Hepes,  
1134 0.25% NP-40, 0.1% BSA in 1X PBS), supernatants aspirated and resuspended in 500  $\mu$ l of 1X  
1135 PBS containing 10  $\mu$ g/ml RNAse A and 20  $\mu$ g/ml PI. This was followed by incubation in the  
1136 dark for 30 mins at room temperature and analysis by flow cytometry. Pulse processing  
1137 (pulse area vs pulse height) was used to exclude doublets, and debris and the gated singlets  
1138 were applied on the PI histogram plot to determine the % cells in the G1, S, and G2/M  
1139 phases.

1140

#### 1141 **Quality assurance and data analysis in flow cytometry**

1142 The BD FACSAria III sorter was optimized and calibrated before every operation (flow  
1143 analysis or sorting) to ensure quality performance. The instrument was calibrated for optical  
1144 laser alignment, fluorescence and light scatter resolution, and fluorescence detector  
1145 sensitivity using the BD<sup>TM</sup> CS&T beads (#656504, BD Biosciences). Drop delay before every  
1146 FACS sort was determined using the BD FACS<sup>TM</sup> Accudrop beads (#345249, BD  
1147 Biosciences) while fluorescence linearity and doublet discrimination before DNA cell-cycle  
1148 analysis were assessed using the BD<sup>TM</sup> DNA QC particles (#349523, BD Biosciences).  
1149 Further, uniform PMT voltage parameters were set for every fluorescent channel using  
1150 appropriate negative control samples to avoid variations in the MFI measurements at different  
1151 time-points of the latency kinetics experiments.

1152 All the flow cytometry data analyses were performed using FCS Express 4 and 6 versions  
1153 (De Novo Software, Los Angeles, CA).

1154

#### 1155 **The analysis of the Tat-transcripts in stable Jurkat cells**

1156 We quantitated Tat transcript levels using a real-time PCR as a surrogate marker of the  
1157 transcriptional status of the LTR during latency-establishment, or latency reversal. Total  
1158 mRNA was extracted from  $0.5 \times 10^6$  cells using a single-step RNA isolation reagent- TRI  
1159 reagent (T9424, Sigma-Aldrich) at specified time points. Using random hexamer primers,  
1160 250-1,000 ng of extracted RNA was converted to cDNA in a reaction volume of 20  $\mu$ l using  
1161 the Tetro cDNA synthesis kit (BIO-65043, Bioline, London, UK). The cDNA was then  
1162 amplified using an SYBR green RT-PCR kit (06924204001, Roche Products, Mumbai, India)  
1163 for a 139 bp region in the Tat exon-1 using the primers- N1783 (5'-  
1164 GGAATCATCCAGGAAGTCAGCCCGAAAC-3') and N1784 (5'-  
1165 CTTCGTCGCTGTCTCCGCTTCTTCCTG-3'). The GAPDH RT-PCR was employed as an



1166 internal control (primer pair N2232: 5'-GAGCTGAACGGGAAGCTCACTG-3' and N2233:  
1167 5'- GCTTCACCACCTTCTTGATGTCA-3'). The relative gene expression was calculated  
1168 using the  $\Delta\Delta C_t$  method.

1169

#### 1170 **Indirect immunofluorescence of Tat**

1171 Immunofluorescence staining of Tat was performed at multiple time points during the  
1172 establishment of viral latency in stable J-cLdGIT-3- $\kappa$ B cells characterized by strong d2EGFP  
1173 fluorescence (MFI range  $5 \times 10^3$  to  $50 \times 10^3$ ). The sorted d2EGFP<sup>High</sup> cells were considered as  
1174 the D0 sample, and Tat-IF was performed subsequently at an interval of every 4 days.  
1175 Approximately  $3 \times 10^6$  cells were collected in a 1.5 ml vial, washed once with 1X PBS, and  
1176 fixed with 2% paraformaldehyde in PBS for 10 min at room temperature with mild rocking.  
1177 Fixed cells were re-washed with 1X PBS followed by permeabilization with 0.2% Triton-X-  
1178 100 in PBS for 10 min with gentle and intermittent vortexing. Fixed and permeabilized cells  
1179 were then washed again with 1X PBS and blocked with 4% BSA in PBS for 30 min at room  
1180 temperature with mild rocking. The blocked cells were incubated with a rabbit, polyclonal  
1181 anti-Tat antibody (ab43014, Abcam, Cambridge, UK) at 1: 250 dilution for 1h at room  
1182 temperature followed by two PBS washes. This was followed by the incubation with 1: 500  
1183 dilution of Goat anti-rabbit Alexa Fluor 568 (A-11010, Molecular Probes) for 20 min in the  
1184 dark at room temperature followed by a PBS wash. The nucleus was stained with 4  $\mu$ g/ml of  
1185 DAPI for 20 min in the dark at room temperature. Cells were washed twice and mounted on  
1186 coverslips with 70% glycerol for confocal imaging. Images were acquired with a Zeiss LSM  
1187 880 confocal laser scanning microscope with Airyscan using a Plan Apochromat X63/1.4- oil  
1188 immersion objective and analyzed using the ZEN 2.1 software. For imaging single cells, a 4X  
1189 higher zoom was applied. The fluorescent cut-off for d2EGFP expression was determined

1190 using uninfected Jurkat control, while that for Tat-Alexa 568 expression was set using the  
1191 infected but no-primary Tat antibody control. At each time-point, 150 cells were analyzed;  
1192 fluorescent intensities (AU) for d2EGFP and Tat-Alexa 568 expressions independently  
1193 determined for the nuclear and extra-nuclear compartments of the cells and temporal curves  
1194 generated.

1195

### 1196 **The proximity ligation assay**

1197 We used an in situ proximity ligation assay (PLA) to detect Tat in HEK293 cells  
1198 independently infected with the cLdGIT-3- and 4-κB reporter virus. The assay was  
1199 performed using a commercial kit (Duolink In Situ Red Starter kit Mouse/Rabbit,  
1200 #DUO92101, Sigma-Aldrich) following the instructions of the manufacturer. Briefly, a  
1201 heterogeneous population of HEK293 cells harboring both active and latent virus (cLdGIT-3-  
1202 κB or 4-κB), marked by the presence or absence of green fluorescence, respectively, were  
1203 seeded on glass coverslips and allowed to grow to 60-70% confluence. The evenly distributed  
1204 cells on the coverslip were fixed with 4% paraformaldehyde for 20 min at room temperature,  
1205 permeabilized with 0.1% Triton-X-100 for 10 min at room temperature and washed thrice  
1206 with 1X PBS. This was followed by blocking for one hour using the reagent supplied in the  
1207 kit. The blocked cells were then treated with the rabbit polyclonal anti-Tat antibody at 1: 250  
1208 dilution (Catalog no. ab43014, Abcam) in combination with the mouse monoclonal anti-Tat  
1209 antibody at 1: 250 dilution (Catalog no. 7377, NIH AIDS reagent program, Maryland, USA).  
1210 The cells were incubated with a pair of probes (the PLA probe Anti-Mouse MINUS;  
1211 DUO92004 and PLA probe Anti-Rabbit PLUS; DUO92002) in a 40 μl reaction volume, for  
1212 one hour at 37<sup>0</sup>C followed by washing twice with 500 μl of wash buffer A for 5 min each  
1213 time. The ligation and amplification reactions were performed as per manufacturer's

1214 instructions using the Duolink In Situ Detection reagents Red (Catalog no. DUO92008). The  
1215 DAPI-supplemented mounting medium (Catalog no. DUO82040, supplied in the PLA kit)  
1216 was used for mounting the cells. No-primary and single antibody controls were used to assess  
1217 non-specific PLA spots. Imaging of the cells was performed using a Zeiss LSM 880 confocal  
1218 laser scanning microscope with Airyscan fitted with a Plan Apochromat 63X/1.4 oil  
1219 immersion objective. Signal intensities of the PLA positive spots were quantitated manually  
1220 using the Image J software. A total of 164 cells were analyzed from the d2EGFP<sup>+</sup> category  
1221 (128 from the 4-κB and 36 from the 3-κB sample) while 168 cells were analyzed from the  
1222 d2EGFP<sup>-</sup> category (123 from the 4-κB and 45 from the 3-κB sample) to compare the number  
1223 of PLA dots per cell between the two phenotypes.

1224 The primary antibody pair, the rabbit polyclonal anti-Tat (ab43014, Abcam) and mouse  
1225 monoclonal anti-Tat (7377, AIDS reagents program) antibodies, was validated for Tat  
1226 specificity before performing PLA in stable HEK293 cells harboring the cLdGIT-3- and 4-κB  
1227 proviruses. Approximately  $0.5 \times 10^6$  HEK293T cells in each well of an 8- micro chambered  
1228 glass slide (80826, ibidi, Grafelfing, Germany) were transfected with either 800 ng of  
1229 pcLGIT vector (B-Tat) or 200, 400 or 800 ng of pcLGIT vector (C-Tat). After 48 hours of  
1230 transfection, Tat-PLA was performed as detailed above. Confocal images were captured  
1231 using the same model of a confocal microscope and identical parameters, as mentioned  
1232 above. Image J software was used to measure d2EGFP intensity (AU) and manual  
1233 quantitation of Tat-PLA spots from 25 cells corresponding to each dose of pcLGIT vector.

1234

### 1235 **Chromatin immunoprecipitation assay**

1236 We used a chromatin preparation equivalent of  $2 \times 10^6$  cells (either EGFP<sup>High</sup> or EGFP<sup>-ve</sup>) for  
1237 each immunoprecipitation assay, as described previously (32). Briefly,  $2 \times 10^6$  Jurkat cells

1238 collected in a 1.5 ml vial were washed with 1X PBS, resuspended in 1 ml of RPMI  
1239 supplemented with 1% formaldehyde and incubated with gentle agitation for 10 min at room  
1240 temperature. The cross-linking reaction was quenched by incubating the cells with 0.125 M  
1241 glycine for 5 min with mild agitation at room temperature followed by centrifugation at 3,000  
1242 rpm for 5 min at 4<sup>0</sup>C with a subsequent PBS wash (containing 0.01X protease inhibitor  
1243 cocktail or PIC; #11836170001, Roche Applied Science, *Indianapolis*, USA). Following the  
1244 complete removal of PBS, the cells were resuspended in 100 µl of ice-chilled lysis buffer  
1245 (1% SDS, 50 mM Tris buffer, pH 8.0, 10 mM EDTA) and incubated on ice for 20 min with  
1246 occasional mixing of the lysate using a wide-bore tip. The lysate in each vial was subjected to  
1247 22 cycles of sonication at the high mode, using 30-second-ON followed by a 30-second-OFF  
1248 pulse scheme in the Bioruptor plus sonicator (UCD-300, Diagenode, Liege, Belgium)  
1249 containing pre-chilled water. The sonicated lysate was centrifuged at 12,000 rpm for 10 min  
1250 at 4<sup>0</sup>C to remove any cellular debris; the clear supernatant was transferred to a fresh 1.5 ml  
1251 vial and stored at -80<sup>0</sup>C until use. One-tenth of the lysate (10 µl) was used to confirm the  
1252 shearing of chromatin to generate 200-500 bp fragment sizes. Each IP comprised of 100 µl of  
1253 lysate and 2 µg of an antigen-specific antibody against p50 (ab7971, Abcam, Cambridge,  
1254 UK), p65 (ab7970, Abcam), NFAT1 (ab2722, Abcam), NFAT2 (ab2796, Abcam), HIV-1 Tat  
1255 (ab43014, Abcam or #7377, NIH AIDS reagent program or #4374, NIH AIDS reagent  
1256 program), RNA Pol II CTD phospho S2 (ab5095, Abcam), or H3K9 Tri Meth (ab8898,  
1257 Abcam). The ChIPed DNA was amplified using the primer pair N1054 FP (5'-  
1258 GATCTGAGCC(T/C)GGGAGCTCTCTG-3') and N1056 RP (5'-  
1259 TCTGAGGGATCTCTAGTTACCAGAGTC-3') spanning a 240 bp sequence within the  
1260 enhancer-core promoter region in the LTR. The amplified DNA fragments were subjected to  
1261 agarose gel electrophoresis, and the band intensities were normalized using the percent-input  
1262 method to compare differential recruitment of each transcription factor at the active vs. latent

1263 promoter. To enhance the sensitivity of the assay, TaqMan qPCR was performed using the  
1264 ChIP-DNA and the primer-probe combination- N2493 FP, N2215 RP, and N2492 Hex (refer  
1265 to Table 1). The final data were evaluated using the percent input method.

1266

## 1267 **Statistics**

1268 Statistical analyses were performed using GraphPad Prism 5.0 software. The statistical tests  
1269 used to calculate *P* values are indicated in the corresponding figure legends.

1270

## 1271 **Acknowledgements**

1272 We thank Prof. Tapas Kumar Kundu (JNCASR, India) and Dr. Ravi Manjithaya (JNCASR,  
1273 India) for intellectual discussions. We thank Dr. Uttara Chakraborty, S.L. Swaroopa Yalla  
1274 and Dr. Narendra Nala of the flow cell at JNCASR, Suma B.S of the Confocal Imaging  
1275 Facility and Anitha G. of the Sequencing Facility at JNCASR, India. We thank Neelakshi  
1276 Varma and Surabhi Jirapure for initial help in establishing the latency models. Several  
1277 reagents were obtained through the AIDS Research and Reference Reagent Program. This  
1278 work was supported by grants to U.R. from the Department of Biotechnology (DBT),  
1279 Government of India (DBT grant no. BT/PR7359/29/651/2012); National Institute of Health  
1280 (NIH), USA (Grant No. NIDA 5RO1DA041751-02), and intramural funds from JNCASR.

## 1281 **Author contributions**

1282 **S.C.**, conception and design, acquisition of data, analysis and interpretation of data, drafting  
1283 or revising the article, and providing essential unpublished data; **M.K.**, acquisition of data,  
1284 analysis and interpretation of data, and providing essential unpublished data; **U.R.**,  
1285 conception and design, fund acquisition, validation, writing, reviewing and editing the article.

1286 **Competing Interests**

1287 We declare that no competing interests exist.

1288

1289 **References**

- 1290 1. Chun T-W, Carruth L, Finzi D, Shen X, DiGiuseppe JA, Taylor H, Hermankova M,  
1291 Chadwick K, Margolick J, Quinn TC. 1997. Quantification of latent tissue reservoirs  
1292 and total body viral load in HIV-1 infection. *Nature* 387:183-188.
- 1293 2. Finzi D, Blankson J, Siliciano JD, Margolick JB, Chadwick K, Pierson T, Smith K,  
1294 Lisiewicz J, Lori F, Flexner C. 1999. Latent infection of CD4+ T cells provides a  
1295 mechanism for lifelong persistence of HIV-1, even in patients on effective  
1296 combination therapy. *Nature medicine* 5:512-517.
- 1297 3. Siliciano RF, Greene WC. 2011. HIV latency. *Cold Spring Harbor perspectives in*  
1298 *medicine* 1:a007096.
- 1299 4. Eisele E, Siliciano RF. 2012. Redefining the viral reservoirs that prevent HIV-1  
1300 eradication. *Immunity* 37:377-388.
- 1301 5. Van Lint C, Bouchat S, Marcello A. 2013. HIV-1 transcription and latency: an update.  
1302 *Retrovirology* 10:1-38.
- 1303 6. Archin NM, Sung JM, Garrido C, Soriano-Sarabia N, Margolis DM. 2014.  
1304 Eradicating HIV-1 infection: seeking to clear a persistent pathogen. *Nature Reviews*  
1305 *Microbiology* 12:750-764.
- 1306 7. Weinberger LS, Burnett JC, Toettcher JE, Arkin AP, Schaffer DV. 2005. Stochastic  
1307 gene expression in a lentiviral positive-feedback loop: HIV-1 Tat fluctuations drive  
1308 phenotypic diversity. *Cell* 122:169-182.
- 1309 8. Weinberger LS, Dar RD, Simpson ML. 2008. Transient-mediated fate determination  
1310 in a transcriptional circuit of HIV. *Nature genetics* 40:466-470.

- 1311 9. Razoogy BS, Pai A, Aull K, Rouzine IM, Weinberger LS. 2015. A hardwired HIV  
1312 latency program. *Cell* 160:990-1001.
- 1313 10. Ho Y-C, Shan L, Hosmane NN, Wang J, Laskey SB, Rosenbloom DI, Lai J, Blankson  
1314 JN, Siliciano JD, Siliciano RF. 2013. Replication-competent noninduced proviruses in  
1315 the latent reservoir increase barrier to HIV-1 cure. *Cell* 155:540-551.
- 1316 11. Weinberger AD, Weinberger LS. 2013. Stochastic fate selection in HIV-infected  
1317 patients. *Cell* 155:497-499.
- 1318 12. Weinberger LS, Shenk T. 2006. An HIV feedback resistor: auto-regulatory circuit  
1319 deactivator and noise buffer. *PLoS Biol* 5:e9.
- 1320 13. Arkin A, Ross J, McAdams HH. 1998. Stochastic kinetic analysis of developmental  
1321 pathway bifurcation in phage  $\lambda$ -infected *Escherichia coli* cells. *Genetics* 149:1633-  
1322 1648.
- 1323 14. Dodd IB, Perkins AJ, Tsemitsidis D, Egan JB. 2001. Octamerization of  $\lambda$  CI repressor  
1324 is needed for effective repression of P<sub>RM</sub> and efficient switching from lysogeny.  
1325 *Genes & development* 15:3013-3022.
- 1326 15. Dwarakanath RS, Clark CL, McElroy AK, Spector DH. 2001. The use of recombinant  
1327 baculoviruses for sustained expression of human cytomegalovirus immediate early  
1328 proteins in fibroblasts. *Virology* 284:297-307.
- 1329 16. Sanders RL, Clark CL, Morello CS, Spector DH. 2008. Development of cell lines that  
1330 provide tightly controlled temporal translation of the human cytomegalovirus IE2  
1331 proteins for complementation and functional analyses of growth-impaired and  
1332 nonviable IE2 mutant viruses. *Journal of virology* 82:7059-7077.
- 1333 17. Stinski MF, Petrik D. 2008. Functional roles of the human cytomegalovirus essential  
1334 IE86 protein, p 133-152, *Human Cytomegalovirus*. Springer.

- 1335 18. Ragoczy T, Miller G. 2001. Autostimulation of the Epstein-Barr virus BRLF1  
1336 promoter is mediated through consensus Sp1 and Sp3 binding sites. *Journal of*  
1337 *virology* 75:5240-5251.
- 1338 19. Sarisky RT, Gao Z, Lieberman PM, Fixman ED, Hayward GS, Hayward SD. 1996. A  
1339 replication function associated with the activation domain of the Epstein-Barr virus  
1340 Zta transactivator. *Journal of virology* 70:8340-8347.
- 1341 20. Cai W, Astor T, Liptak L, Cho C, Coen D, Schaffer P. 1993. The herpes simplex virus  
1342 type 1 regulatory protein ICP0 enhances virus replication during acute infection and  
1343 reactivation from latency. *Journal of virology* 67:7501-7512.
- 1344 21. Kent JR, Kang W, Miller CG, Fraser NW. 2003. Herpes simplex virus latency-  
1345 associated transcript gene function. *Journal of neurovirology* 9:285-290.
- 1346 22. Roizman B, Gu H, Mandel G. 2005. The first 30 minutes in the life of a virus:  
1347 unREST in the nucleus. *Cell Cycle* 4:1019-1021.
- 1348 23. Razoooky BS, Weinberger LS. 2011. Mapping the architecture of the HIV-1 Tat  
1349 circuit: A decision-making circuit that lacks bistability and exploits stochastic noise.  
1350 *Methods* 53:68-77.
- 1351 24. Bachu M, Mukthey AB, Murali RV, Cheedarla N, Mahadevan A, Shankar SK, Satish  
1352 KS, Kundu TK, Ranga U. 2012. Sequence insertions in the HIV type 1 subtype C  
1353 viral promoter predominantly generate an additional NF- $\kappa$ B binding site. *AIDS*  
1354 *research and human retroviruses* 28:1362-1368.
- 1355 25. Bachu M, Yalla S, Asokan M, Verma A, Neogi U, Sharma S, Murali RV, Mukthey  
1356 AB, Bhatt R, Chatterjee S. 2012. Multiple NF- $\kappa$ B sites in HIV-1 subtype C long  
1357 terminal repeat confer superior magnitude of transcription and thereby the enhanced  
1358 viral predominance. *Journal of Biological Chemistry* 287:44714-44735.



- 1359 26. Burnett JC, Miller-Jensen K, Shah PS, Arkin AP, Schaffer DV. 2009. Control of  
1360 stochastic gene expression by host factors at the HIV promoter. *PLoS Pathog*  
1361 5:e1000260.
- 1362 27. Li X, Zhao X, Fang Y, Jiang X, Duong T, Fan C, Huang C-C, Kain SR. 1998.  
1363 Generation of destabilized green fluorescent protein as a transcription reporter.  
1364 *Journal of Biological Chemistry* 273:34970-34975.
- 1365 28. Banaszynski LA, Chen L-c, Maynard-Smith LA, Ooi AL, Wandless TJ. 2006. A  
1366 rapid, reversible, and tunable method to regulate protein function in living cells using  
1367 synthetic small molecules. *Cell* 126:995-1004.
- 1368 29. Maynard-Smith LA, Chen L-c, Banaszynski LA, Ooi AL, Wandless TJ. 2007. A  
1369 directed approach for engineering conditional protein stability using biologically  
1370 silent small molecules. *Journal of Biological Chemistry* 282:24866-24872.
- 1371 30. Gustafsdottir SM, Schallmeiner E, Fredriksson S, Gullberg M, Söderberg O, Jarvius  
1372 M, Jarvius J, Howell M, Landegren U. 2005. Proximity ligation assays for sensitive  
1373 and specific protein analyses. *Analytical biochemistry* 345:2-9.
- 1374 31. Söderberg O, Gullberg M, Jarvius M, Ridderstråle K, Leuchowius K-J, Jarvius J,  
1375 Wester K, Hydbring P, Bahram F, Larsson L-G. 2006. Direct observation of  
1376 individual endogenous protein complexes in situ by proximity ligation. *Nature*  
1377 *methods* 3:995-1000.
- 1378 32. Verma A, Rajagopalan P, Lotke R, Varghese R, Selvam D, Kundu TK, Ranga U.  
1379 2016. Functional incompatibility between the generic NF- $\kappa$ B motif and a subtype-  
1380 specific Sp1III element drives the formation of the HIV-1 subtype C viral promoter.  
1381 *Journal of virology* 90:7046-7065.
- 1382 33. Barbeau B, Bernier R, Dumais N, Briand G, Olivier M, Faure R, Posner BI, Tremblay  
1383 M. 1997. Activation of HIV-1 long terminal repeat transcription and virus replication

- 1384 via NF- $\kappa$ B-dependent and-independent pathways by potent phosphotyrosine  
1385 phosphatase inhibitors, the peroxovanadium compounds. *Journal of Biological*  
1386 *Chemistry* 272:12968-12977.
- 1387 34. Chen-Park FE, Huang D-B, Noro B, Thanos D, Ghosh G. 2002. The  $\kappa$ B DNA  
1388 sequence from the HIV long terminal repeat functions as an allosteric regulator of  
1389 HIV transcription. *Journal of Biological Chemistry* 277:24701-24708.
- 1390 35. Stroud JC, Oltman A, Han A, Bates DL, Chen L. 2009. Structural basis of HIV-1  
1391 activation by NF- $\kappa$ B—A higher-order complex of p50: Rel $\alpha$  bound to the HIV-1 LTR.  
1392 *Journal of molecular biology* 393:98-112.
- 1393 36. Williams SA, Chen LF, Kwon H, Ruiz-Jarabo CM, Verdin E, Greene WC. 2006.  
1394 NF- $\kappa$ B p50 promotes HIV latency through HDAC recruitment and repression of  
1395 transcriptional initiation. *The EMBO journal* 25:139-149.
- 1396 37. Kinoshita S, Chen BK, Kaneshima H, Nolan GP. 1998. Host control of HIV-1  
1397 parasitism in T cells by the nuclear factor of activated T cells. *Cell* 95:595-604.
- 1398 38. Kinoshita S, Su L, Amano M, Timmerman LA, Kaneshima H, Nolan GP. 1997. The T  
1399 cell activation factor NF-ATc positively regulates HIV-1 replication and gene  
1400 expression in T cells. *Immunity* 6:235-244.
- 1401 39. Macián F, Rao A. 1999. Reciprocal modulatory interaction between human  
1402 immunodeficiency virus type 1 Tat and transcription factor NFAT1. *Molecular and*  
1403 *Cellular Biology* 19:3645-3653.
- 1404 40. Southgate CD, Green MR. 1991. The HIV-1 Tat protein activates transcription from  
1405 an upstream DNA-binding site: implications for Tat function. *Genes & Development*  
1406 5:2496-2507.

- 1407 41. Dandekar DH, Ganesh KN, Mitra D. 2004. HIV-1 Tat directly binds to NF $\kappa$ B  
1408 enhancer sequence: role in viral and cellular gene expression. *Nucleic acids research*  
1409 32:1270-1278.
- 1410 42. Barboric M, Peterlin BM. 2005. A new paradigm in eukaryotic biology: HIV Tat and  
1411 the control of transcriptional elongation. *PLoS Biol* 3:e76.
- 1412 43. Mbonye U, Karn J. 2017. The molecular basis for human immunodeficiency virus  
1413 latency. *Annual review of virology* 4:261-285.
- 1414 44. Pierson T, McArthur J, Siliciano RF. 2000. Reservoirs for HIV-1: mechanisms for  
1415 viral persistence in the presence of antiviral immune responses and antiretroviral  
1416 therapy. *Annual review of immunology* 18:665-708.
- 1417 45. Pearson R, Kim YK, Hokello J, Lassen K, Friedman J, Tyagi M, Karn J. 2008.  
1418 Epigenetic silencing of human immunodeficiency virus (HIV) transcription by  
1419 formation of restrictive chromatin structures at the viral long terminal repeat drives  
1420 the progressive entry of HIV into latency. *Journal of virology* 82:12291-12303.
- 1421 46. Perelson AS, Neumann AU, Markowitz M, Leonard JM, Ho DD. 1996. HIV-1  
1422 dynamics in vivo: virion clearance rate, infected cell life-span, and viral generation  
1423 time. *Science* 271:1582-1586.
- 1424 47. Van Duyne R, Easley R, Wu W, Berro R, Pedati C, Klase Z, Kehn-Hall K, Flynn EK,  
1425 Symer DE, Kashanchi F. 2008. Lysine methylation of HIV-1 Tat regulates  
1426 transcriptional activity of the viral LTR. *Retrovirology* 5:40.
- 1427 48. Xie B, Invernizzi CF, Richard S, Wainberg MA. 2007. Arginine methylation of the  
1428 human immunodeficiency virus type 1 Tat protein by PRMT6 negatively affects Tat  
1429 Interactions with both cyclin T1 and the Tat transactivation region. *Journal of*  
1430 *virology* 81:4226-4234.

- 1431 49. Pagans S, Kauder SE, Kaehlcke K, Sakane N, Schroeder S, Dormeyer W, Trievel RC,  
1432 Verdin E, Schnolzer M, Ott M. 2010. The Cellular lysine methyltransferase Set7/9-  
1433 KMT7 binds HIV-1 TAR RNA, monomethylates the viral transactivator Tat, and  
1434 enhances HIV transcription. *Cell host & microbe* 7:234-244.
- 1435 50. Sivakumaran H, van der Horst A, Fulcher AJ, Apolloni A, Lin M-H, Jans DA,  
1436 Harrich D. 2009. Arginine methylation increases the stability of human  
1437 immunodeficiency virus type 1 Tat. *Journal of virology* 83:11694-11703.
- 1438 51. Endo-Munoz L, Warby T, Harrich D, McMillan NA. 2005. Phosphorylation of HIV  
1439 Tat by PKR increases interaction with TAR RNA and enhances transcription.  
1440 *Virology journal* 2:17.
- 1441 52. Ammosova T, Berro R, Jerebtsova M, Jackson A, Charles S, Klase Z, Southerland W,  
1442 Gordeuk VR, Kashanchi F, Nekhai S. 2006. Phosphorylation of HIV-1 Tat by CDK2  
1443 in HIV-1 transcription. *Retrovirology* 3:1-21.
- 1444 53. Brès V, Kiernan RE, Linares LK, Chable-Bessia C, Plechakova O, Tréand C, Emiliani  
1445 S, Peloponese J-M, Jeang K-T, Coux O. 2003. A non-proteolytic role for ubiquitin in  
1446 Tat-mediated transactivation of the HIV-1 promoter. *Nature cell biology* 5:754-761.
- 1447 54. Tosi G, Meazza R, De Lerma Barbaro A, D'Agostino A, Mazza S, Corradin G, Albin  
1448 A, Noonan DM, Ferrini S, Accolla RS. 2000. Highly stable oligomerization forms of  
1449 HIV-1 Tat detected by monoclonal antibodies and requirement of monomeric forms  
1450 for the transactivating function on the HIV-1 LTR. *European journal of immunology*  
1451 30:1120-1126.
- 1452 55. Ott M, Dorr A, Hetzer-Egger C, Kaehlcke K, Schnolzer M, Henklein P, Cole P,  
1453 Zhou MM, Verdin E. Tat Acetylation: A Regulatory Switch between Early and Late  
1454 Phases in HIV Transcription Elongation, p 182-196. *In* (ed), Wiley Online Library,

- 1455 56. Van Zyl G, Bale MJ, Kearney MF. 2018. HIV evolution and diversity in ART-treated  
1456 patients. *Retrovirology* 15:1-12.
- 1457 57. Jeeninga RE, Hoogenkamp M, Armand-Ugon M, de Baar M, Verhoef K, Berkhout B.  
1458 2000. Functional differences between the long terminal repeat transcriptional  
1459 promoters of human immunodeficiency virus type 1 subtypes A through G. *Journal of*  
1460 *virology* 74:3740-3751.
- 1461 58. Mbondji-Wonje C, Dong M, Wang X, Zhao J, Ragupathy V, Sanchez AM, Denny  
1462 TN, Hewlett I. 2018. Distinctive variation in the U3R region of the 5'Long Terminal  
1463 Repeat from diverse HIV-1 strains. *PloS one* 13:e0195661.
- 1464 59. Montano MA, Novitsky VA, Blackard JT, Cho NL, Katzenstein DA, Essex M. 1997.  
1465 Divergent transcriptional regulation among expanding human immunodeficiency  
1466 virus type 1 subtypes. *Journal of virology* 71:8657-8665.
- 1467 60. Garcia JA, Harrich D, Pearson L, Mitsuyasu R, Gaynor RB. 1988. Functional  
1468 domains required for tat-induced transcriptional activation of the HIV-1 long  
1469 terminal repeat. *The EMBO journal* 7:3143-3147.
- 1470 61. Pereira LA, Bentley K, Peeters A, Churchill MJ, Deacon NJ. 2000. SURVEY AND  
1471 SUMMARY A compilation of cellular transcription factor interactions with the HIV-  
1472 1 LTR promoter. *Nucleic acids research* 28:663-668.
- 1473 62. Bosque A, Planelles V. 2009. Induction of HIV-1 latency and reactivation in primary  
1474 memory CD4+ T cells. *Blood, The Journal of the American Society of Hematology*  
1475 113:58-65.
- 1476 63. Chan JK, Bhattacharyya D, Lassen KG, Ruelas D, Greene WC. 2013.  
1477 Calcium/calcineurin synergizes with prostratin to promote NF- $\kappa$ B dependent  
1478 activation of latent HIV. *PLoS One* 8:e77749.

- 1479 64. Colin L, Van Lint C. 2009. Molecular control of HIV-1 postintegration latency:  
1480 implications for the development of new therapeutic strategies. *Retrovirology* 6:111.
- 1481 65. Duverger A, Wolschendorf F, Zhang M, Wagner F, Hatcher B, Jones J, Cron RQ, van  
1482 der Sluis RM, Jeeninga RE, Berkhout B. 2013. An AP-1 binding site in the  
1483 enhancer/core element of the HIV-1 promoter controls the ability of HIV-1 to  
1484 establish latent infection. *Journal of virology* 87:2264-2277.
- 1485 66. Rohr O, Marban C, Aunis D, Schaeffer E. 2003. Regulation of HIV-1 gene  
1486 transcription: from lymphocytes to microglial cells. *Journal of leukocyte biology*  
1487 74:736-749.
- 1488 67. Baeuerle PA, Baltimore D. 1989. A 65-kDa subunit of active NF- $\kappa$ B is  
1489 required for inhibition of NF- $\kappa$ B by I  $\kappa$ B. *Genes & development* 3:1689-  
1490 1698.
- 1491 68. Doetzlhofer A, Rotheneder H, Lagger G, Koranda M, Kurtev V, Brosch G,  
1492 Wintersberger E, Seiser C. 1999. Histone deacetylase 1 can repress transcription by  
1493 binding to Sp1. *Molecular and cellular biology* 19:5504-5511.
- 1494 69. Suzuki T, Yamamoto T, Kurabayashi M, Nagai R, Yazaki Y, Horikoshi M. 1998.  
1495 Isolation and initial characterization of GBF, a novel DNA-binding zinc finger protein  
1496 that binds to the GC-rich binding sites of the HIV-1 promoter. *The Journal of*  
1497 *Biochemistry* 124:389-395.
- 1498 70. Mahmoudi T. 2012. The BAF complex and HIV latency. *Transcription* 3:171-176.
- 1499 71. Pessler F, Cron R. 2004. Reciprocal regulation of the nuclear factor of activated T  
1500 cells and HIV-1. *Genes & Immunity* 5:158-167.
- 1501 72. Bates DL, Barthel KK, Wu Y, Kalhor R, Stroud JC, Giffin MJ, Chen L. 2008. Crystal  
1502 structure of NFAT bound to the HIV-1 LTR tandem  $\kappa$ B enhancer element. *Structure*  
1503 16:684-694.

- 1504 73. Giffin MJ, Stroud JC, Bates DL, von Koenig KD, Hardin J, Chen L. 2003. Structure  
1505 of NFAT1 bound as a dimer to the HIV-1 LTR  $\kappa$ B element. *Nature Structural &*  
1506 *Molecular Biology* 10:800-806.
- 1507 74. Chatterjee A, Kaznessis YN, Hu W-S. 2008. Tweaking biological switches through a  
1508 better understanding of bistability behavior. *Current opinion in biotechnology* 19:475-  
1509 481.
- 1510 75. Hoffmann A, Levchenko A, Scott ML, Baltimore D. 2002. The I $\kappa$ B-NF- $\kappa$ B signaling  
1511 module: temporal control and selective gene activation. *Science* 298:1241-1245.
- 1512 76. Smith KA, Popmihajlov Z. 2008. The quantal theory of immunity and the  
1513 interleukin-2-dependent negative feedback regulation of the immune response.  
1514 *Immunological reviews* 224:124-140.
- 1515 77. Gartner MJ, Roche M, Churchill MJ, Gorry PR, Flynn JK. 2020. Understanding the  
1516 mechanisms driving the spread of subtype C HIV-1. *EBioMedicine* 53:102682.
- 1517 78. Jordan A, Bisgrove D, Verdin E. 2003. HIV reproducibly establishes a latent infection  
1518 after acute infection of T cells in vitro. *The EMBO journal* 22:1868-1877.
- 1519 79. Miller-Jensen K, Dey SS, Pham N, Foley JE, Arkin AP, Schaffer DV. 2012.  
1520 Chromatin accessibility at the HIV LTR promoter sets a threshold for NF- $\kappa$ B  
1521 mediated viral gene expression. *Integrative Biology* 4:661-671.
- 1522 80. Dahabieh MS, Ooms M, Brumme C, Taylor J, Harrigan PR, Simon V, Sadowski I.  
1523 2014. Direct non-productive HIV-1 infection in a T-cell line is driven by cellular  
1524 activation state and NF $\kappa$ B. *Retrovirology* 11:1-17.
- 1525 81. Li Z, Guo J, Wu Y, Zhou Q. 2013. The BET bromodomain inhibitor JQ1 activates  
1526 HIV latency through antagonizing Brd4 inhibition of Tat-transactivation. *Nucleic*  
1527 *acids research* 41:277-287.

1528 82. Jordan M, Schallhorn A, Wurm FM. 1996. Transfecting mammalian cells:  
 1529 optimization of critical parameters affecting calcium-phosphate precipitate formation.  
 1530 Nucleic acids research 24:596-601.

1531 83. Zhu H, Coppinger JA, Jang C-Y, Yates III JR, Fang G. 2008. FAM29A promotes  
 1532 microtubule amplification via recruitment of the NEDD1- $\gamma$ -tubulin complex to the  
 1533 mitotic spindle. The Journal of cell biology 183:835-848.

1534

1535 **Table 1: Primer sets used in PCR**

1536

| <b>Primer sets used for the site-directed mutagenesis of NF-<math>\kappa</math>B copy-number variant LTRs in the pcLGIT/pcLdGIT vector (ATF model)</b> |                    |                    |                                                                                   |
|--------------------------------------------------------------------------------------------------------------------------------------------------------|--------------------|--------------------|-----------------------------------------------------------------------------------|
| <b>LTR-Variant</b>                                                                                                                                     | <b>Primer pair</b> | <b>Description</b> | <b>Sequence of primers (5'-3')</b>                                                |
| FHHC<br>(4- $\kappa$ B)                                                                                                                                | N1992 FP           | Inner primers      | TGACACAGAAGGGACTTTCTGCTGACAC<br>AGAAGGGACTTTCCGCTGGGACTTTCCAC<br>TGGGGCGTTCC      |
|                                                                                                                                                        | N1993 RP           |                    | AAGTCCCAGCGGAAAGTCCCTTCTGTGTC<br>AGCAGAAAGTCCCTTCTGTGTCAGCAGTC<br>TTTGTA AAACTCCG |
| OHHC<br>(3- $\kappa$ B)                                                                                                                                | N1994 FP           |                    | TGACACAGAATCTACTTTTTGCTGACACA<br>GAAGGGACTTTCCGCTGGGACTTTCCACT<br>GGGGCGTTCC      |
|                                                                                                                                                        | N1995 RP           |                    | AAGTCCCAGCGGAAAGTCCCTTCTGTGTC<br>AGCAAAAAGTAGATTCTGTGTCAGCAGT<br>CTTTGTAAA ACTCCG |
| OOHC<br>(2- $\kappa$ B)                                                                                                                                | N1996 FP           |                    | TGACACAGAATCTACTTTTTGCTGACACA<br>GAATCTACTTTTTGCTGGGACTTTCCACT<br>GGGGCGTTCC      |
|                                                                                                                                                        | N1997 RP           |                    | AAGTCCCAGCAAAAAGTAGATTCTGTGT<br>CAGCAAAAAGTAGATTCTGTGTCAGCAG<br>TCTTTGTAAA ACTCCG |
| OOOC<br>(1- $\kappa$ B)                                                                                                                                | N1998 FP           |                    | TGACACAGAATCTACTTTTTGCTGACACA<br>GAATCTACTTTTTGCTTCTACTTTTTACTG                   |



|                                                                                                   |                                                           |                                                       |                                                                                              |
|---------------------------------------------------------------------------------------------------|-----------------------------------------------------------|-------------------------------------------------------|----------------------------------------------------------------------------------------------|
|                                                                                                   | N1999 RP                                                  |                                                       | GGGCGTTCC<br>AAGTAGAAGCAAAAAGTAGATTCTGTGT<br>CAGCAAAAAGTAGATTCTGTGTCAGCAG<br>TCTTTGTAAACTCCG |
| OOOO<br>(0-κB)                                                                                    | N2000 FP                                                  |                                                       | TGACACAGAATCTACTTTTTGCTGACACA<br>GAATCTACTTTTTGCTTCTACTTTTTACTT<br>CTACTTTTTAGG              |
|                                                                                                   | N2001 RP                                                  |                                                       | AAGTAGAAGCAAAAAGTAGATTCTGTGT<br>CAGCAAAAAGTAGATTCTGTGTCAGCAG<br>TCTTTGTAAACTCCG              |
| <b>Primers used for the construction of the pLdGITRD vector backbone (p913 series; TTF model)</b> |                                                           |                                                       |                                                                                              |
| <b>Amplicon</b>                                                                                   | <b>Amplicon length</b>                                    | <b>Primer pair</b>                                    | <b>Sequence of primers (5'-3')</b>                                                           |
| d2EGFP-IRES-Tat                                                                                   | 1779 bp                                                   | N2720 FP                                              | TTTCTTCCATTGCGGCCGCGCCGCCACCA<br>TGGCCTCCTCCGAGAACGTC                                        |
|                                                                                                   |                                                           | N2724 RP                                              | GGCCATTTCTGAAGTCGAAGGGGTCT                                                                   |
| DsRed2-RFP                                                                                        | 629 bp                                                    | N2723 FP                                              | ACTTCGAAATGGCCTCCTCCGAGAACG                                                                  |
|                                                                                                   |                                                           | N2726 RP                                              | TCCGATATCCAGGAACAGGTGGTGGC                                                                   |
| FKBP DD                                                                                           | 353 bp                                                    | N2725 FP                                              | TGTTCTGGATATCGGAGTGCAGGTGGA<br>AACCATC                                                       |
|                                                                                                   |                                                           | N2722 RP                                              | CGTACGCGGCGCGCCTCATTCCAGTTCTA<br>GAAGCTCC                                                    |
| <b>Primers used for the determination of proviral integration frequency</b>                       |                                                           |                                                       |                                                                                              |
| <b>Target region</b>                                                                              | <b>Primer pair/<br/>primer-<br/>probe<br/>combination</b> | <b>Primer/probe sequence (5'-3')</b>                  |                                                                                              |
| Strong-stop DNA                                                                                   | N2208 FP                                                  | GATCTGAGCC(T/C)GGGAGCTCTCTG                           |                                                                                              |
|                                                                                                   | N2209 RP                                                  | TCTGAGGGATCTCTAGTTACCAGAGTC                           |                                                                                              |
|                                                                                                   | N2210 probe                                               | FAM-<br>CTGCTTAAGCCTCAATAAAGCTTGCCTTGAGTGC<br>T-TAMRA |                                                                                              |
| <b>Primers used in Chromatin immunoprecipitation- qPCR</b>                                        |                                                           |                                                       |                                                                                              |

|              |             |                                         |
|--------------|-------------|-----------------------------------------|
| LTR-enhancer | N2493 FP    | CCGGAGT(A/T)TTACAAAGACTGCTG             |
|              | N2215 RP    | CTGCTTATATGCAGCATCTGAGG                 |
|              | N2492 probe | HEX-CACTGGGGCGTTCCAGG(G/A)GG(A/T)GT-BHQ |

1537

1538

1539

1540 **Figure legends**

1541

1542 **Figure 1: A schematic representation of NF- $\kappa$ B motif diversity in HIV-1C LTR.** The  
1543 canonical HIV-1B LTR containing two identical NF- $\kappa$ B motifs is presented at the top. The  
1544 distinct regulatory regions (U3, R, U5, the modulator, the enhancer, and the core promoter)  
1545 and important transcription factor binding sites have been depicted. HIV-1C LTR not only  
1546 contains more copies of the NF- $\kappa$ B motif (3 or 4 copies) but the additional motifs are also  
1547 genetically variable (the bottom panel). The three genetically distinct NF- $\kappa$ B motifs present  
1548 in the C-LTR are denoted as H (GGGACTTTCC), C (GGGGCGTTCC, differences  
1549 underlined), and F (GGGACTTTCT). Note that the Sp1III site also contains subtype-specific  
1550 variations as presented; B and C representing respective viral subtypes.

1551

1552 **Figure 2: Viral gene expression is proportional to the number of NF- $\kappa$ B motifs in the C-**  
1553 **LTR. (A)** A schematic of the cLGIT/cLdGIT sub-genomic viral vector panels of the  
1554 autonomous feedback (ATF) model is presented. Note that both the 3' LTR and Tat are of  
1555 HIV-1C origin. The nucleotide sequences of the four NF- $\kappa$ B motifs and the inactivating  
1556 mutations introduced in the motifs of the variant viral strains have been depicted. The EGFP

1557 reporter gene (half-life ~ 48 h) of the cLGIT vector backbone is replaced with its shorter half-  
1558 life variant d2EGFP (half-life ~ 2h) in the cLdGIT backbone. **(B)** The time schematic of the  
1559 gene-expression analysis from the cLGIT vector panel. One million Jurkat cells were infected  
1560 at an RIU of ~ 0.5-0.6, independently with each LTR-variant strain. After 72 h of infection,  
1561 half of the infected cells were activated with a cocktail of global T-cell activators  
1562 (PMA+TNF $\alpha$ +TSA+HMBA) and 24 h post-activation, EGFP and Tat-transcript expressions  
1563 were estimated for both the un-activated and activated fractions using a flow-cytometer and a  
1564 Tat specific RT-PCR, respectively. **(C)** Representative EGFP histograms of the five variant  
1565 LTRs. The black dotted histogram represents Jurkat cells not infected and not activated; the  
1566 black hollow histogram represents cells infected but not activated, and the solid grey  
1567 histogram represents cells infected and activated. The intensity ranges of EGFP<sup>+</sup>, EGFP<sup>Low</sup>,  
1568 and EGFP<sup>High</sup> are indicated as GFP<sup>-</sup>, GFP<sup>L</sup> and GFP<sup>H</sup>, respectively along with the frequency  
1569 of each fraction (% values). The black arrows point at the gradual decline in the EGFP<sup>High</sup>  
1570 (MFI > 10<sup>4</sup> RFU) population representing the Tat-transactivated population with decreasing  
1571 copies of NF- $\kappa$ B elements. **(D)** The mean EGFP MFI values from experimental  
1572 quadruplicates  $\pm$  SD, data are representative of two independent experiments. Two-way  
1573 ANOVA with Bonferroni post-test correction was used for the statistical evaluation (\*p<0.05,  
1574 \*\*\*p<0.001 and ns – non-significant). The % GFP<sup>+</sup> profile in the inset confirms near  
1575 equivalent infection of the target cells with the LTR-variant viral strains at ~ 0.5-0.6 RIU.  
1576 **(E)** EGFP-expression manifests a positive linear correlation with the NF- $\kappa$ B copy-number as  
1577 indicated by the fold enhancement in the EGFP MFI (ratio of the EGFP MFI values of the  
1578 activated and uninduced fractions from each variant LTR) vs NF- $\kappa$ B copy-number plot. **(F)**  
1579 Live-dead assay to compare the % live cells between the activated and uninduced pairs. Mean  
1580 values from experimental quadruplicates  $\pm$  SD, data are representative of two independent  
1581 experiments (\*p<0.05, ns- non significant; two-tailed, unpaired *t*-test). **(G)** Tat expression

1582 was evaluated in an RT-PCR using the  $\Delta\Delta C_t$  method and GAPDH as the reference gene from  
1583 total mRNA extracted from 0.2 to 0.5 million cells of un-activated and activated populations.  
1584 Mean values of the relative Tat-mRNA expression from three independent experiments  $\pm$   
1585 SEM are plotted. Two-way ANOVA with Bonferroni post-test correction was used for  
1586 statistical analyses. (\*\* $p < 0.01$ , \*\*\* $p < 0.001$  and ns – non-significant). **(H)** The Tat transcript  
1587 expression is directly proportional to the NF- $\kappa$ B copy number as observed from the fold  
1588 enhancement in the Tat transcript levels of the activated fraction over the uninduced fraction.  
1589 **(I)** Comparable GAPDH Ct values for the different stimulation conditions as well as across  
1590 the variant viral strains are indicated (\* $p < 0.05$ , ns- non significant; two-tailed, unpaired  $t$ -  
1591 test).

1592

1593 **Figure 3: In the ATF model, the stronger the promoter, the faster the latency**  
1594 **establishment.** **(A)** A schematic representation of the experimental protocol is depicted. One  
1595 million Jurkat cells were infected with individual strains of the cLGIT panel at a low  
1596 infectious titer of  $\sim 0.1$ - $0.2$  RIU, allowed to relax for a week, treated with the cocktail of  
1597 global T-cell activators, and 24 h later, all the EGFP<sup>+</sup> cells (harboring active provirus; MFI  
1598  $> 10^3$  RFU) were sorted. The sorted, total EGFP<sup>+</sup> cells were then maintained in culture, and  
1599 the EGFP expression was monitored by flow cytometry every four days and that of Tat  
1600 transcripts on days 0, 8 and 16. **(B)** The gating strategies used to sort the total EGFP<sup>+</sup>  
1601 population and for the subsequent latency establishment assay are depicted. Initially, the  
1602 debris were excluded in the FSC vs SSC scatter plot, and the total EGFP<sup>+</sup> cells from the  
1603 population- P were sorted. Importantly, a live-dead exclusion dye was used to stain the post-  
1604 sorted cells to include only the live, EGFP<sup>+</sup> for the latency kinetics analyses. The total EGFP<sup>+</sup>  
1605 gate was further sub-gated into EGFP<sup>Low</sup> and EGFP<sup>High</sup> fractions for subsequent analyses  
1606 (Figure 3F and 3G, respectively). **(C)** Representative, post-sort, stacked histograms

1607 representing the temporal events during transcriptional silencing. The NF- $\kappa$ B variant viral  
1608 strains demonstrate varying proportions of EGFP<sup>High</sup> and EGFP<sup>Low</sup> cells in the total EGFP<sup>+</sup>  
1609 sort. **(D)**, **(E)**, **(F)**, and **(G)** indicate the kinetic curves corresponding to the total EGFP MFI,  
1610 percentages of total EGFP<sup>+</sup>, EGFP<sup>High</sup>, and EGFP<sup>Low</sup> cells, respectively. Data are  
1611 representative of three independent experiments. Mean values from experimental triplicates  $\pm$   
1612 SD, are plotted. Two-way ANOVA with Bonferroni post-test correction was used for the  
1613 statistical evaluation (\*\*p<0.001). **(H)** Kinetic curves of relative Tat-mRNA levels of the  
1614 NF- $\kappa$ B variant strains **(I)** The absolute Ct values of the GAPDH transcripts at different time  
1615 points. Data are representative of two independent experiments. Mean values from  
1616 experimental triplicates  $\pm$  SD plotted. Two-way ANOVA with Bonferroni post-test correction  
1617 was used for the statistical evaluation (\*\*p<0.001). **(J)** The integration frequency for the  
1618 five LTR-variant viral strains was estimated using the standard curve and the regression  
1619 analysis. Viral integration was found to be  $\sim$ 1.0 per cell for all the five variants. Data are  
1620 representative of two independent experiments. Mean values from experimental triplicates  $\pm$   
1621 SD values are plotted. **(K)** Live-dead analysis confirms comparable levels of % live cells  
1622 between the NF- $\kappa$ B variants and across different time-points.

1623

1624 **Figure 4: The binary latency trajectory of the GFP<sup>High</sup> population delineates the viral**  
1625 **promoter into strong (3- and 4- $\kappa$ B) and weak (2, 1, and 0- $\kappa$ B) LTRs.** **(A)** The  
1626 experimental schemes to study the kinetics of latency establishment in EGFP<sup>High</sup> and  
1627 d2EGFP<sup>High</sup> cells **(B)**, **(C)**, **(D)** and **(E)** represent the comparative kinetic profiles of EGFP  
1628 MFI, % EGFP<sup>+</sup>, d2EGFP MFI and % d2EGFP<sup>+</sup> cells, respectively. Mean values from  
1629 experimental triplicates  $\pm$  SD, representative of two independent experiments are plotted.  
1630 Two-way ANOVA with Bonferroni post-test correction was used for the statistical evaluation

1631 (\*\*\*) $p < 0.001$  and ns – non-significant). **(F)** The stacked histogram profiles of the EGFP<sup>High</sup>  
1632 cells during latency establishment is presented. The sorted EGFP<sup>High</sup> cells (GFP<sup>H</sup>; MFI  $> 10^4$   
1633 RFU) comprising of a homogeneous population of Tat-mediated transactivated cells,  
1634 transitioned to the EGFP<sup>-</sup> phenotype (GFP<sup>-</sup>) through an EGFP<sup>Low</sup> cluster (GFP<sup>L</sup>; MFI  $\sim 10^2 -$   
1635  $10^4$  RFU) representing the cells with a basal-level transcription without an intermediate  
1636 phenotype. **(G)** The stacked histogram profile of the d2EGFP<sup>High</sup> cells during latency  
1637 establishment identified regions of d2EGFP<sup>-</sup> (GFP<sup>-</sup>; MFI  $< 10^3$  RFU), d2EGFP<sup>Low</sup> (GFP<sup>L</sup>;  
1638 MFI  $\sim 10^3 - 10^4$  RFU), and d2EGFP<sup>High</sup> (GFP<sup>H</sup>; MFI  $> 10^4$  RFU) phenotypes as demarcated. Of  
1639 note, given the shorter half-life of d2EGFP, the stability of the d2EGFP<sup>Low</sup> phenotype was  
1640 extremely transient; hence the present system lacked a distinct d2EGFP<sup>Low</sup> cluster at any time  
1641 point unlike in the EGFP system (Figures 3C and 4G).

1642

1643 **Figure 5: The manifestation of three distinct latency phenotypes of single EGFP<sup>High</sup>**  
1644 **cells.** **(A)** The experimental layout of latency establishment in single-cell clones is essentially  
1645 similar to that of the non-clonal, population kinetics as in Figure 4A. The EGFP<sup>High</sup> cells  
1646 (MFI  $> 10^4$  RFU) were single-cell sorted, expanded for three-four weeks, and the pattern of  
1647 EGFP expression was assessed on days 21 and 28 post-sorting by flow cytometry and  
1648 fluorescence microscopy. EGFP expression of 16 randomly selected clones, corresponding to  
1649 each viral variant was measured. **(B)** Based on the fluorescence profile, three distinct  
1650 categories of clone- persisters (EGFP<sup>High</sup>, MFI  $> 10^4$  RFU), relaxers (EGFP<sup>-</sup>, MFI  $< 10^3$ ), and  
1651 bimodallers (binary population of persisters and relaxers) were identified. **(C)** The relative  
1652 proportion of the above three phenotypes among the LTR-variants as a function of time as  
1653 indicated at Day 21 and 28 post-sorting. **(D)** and **(H)** Two bimodal cell lines, 3c and 8c  
1654 representing the 4- $\kappa$ B and 3- $\kappa$ B LTRs, respectively, demonstrate bimodal gene expression.  
1655 The sorted EGFP<sup>-</sup> cells from the 4- $\kappa$ B and 3- $\kappa$ B clones generate 95.8% (Figure 5D) and

1656 90.4% (Figure 5H) EGFP<sup>High</sup> cells, respectively, following activation with the global  
1657 activation cocktail with negligible proportion of cells displaying the intermediate phenotype.  
1658 **(E)** and **(I)** A Taqman qPCR targeting a region of the LTR, performed as in Figure 3J,  
1659 confirms a comparable integration frequency (~1.0 provirus per cell) between the EGFP<sup>-</sup> and  
1660 EGFP<sup>High</sup> fractions in both the 4-κB (Figure 5E) and the 3-κB (Figure 5I) clones. **(F)** and **(J)**  
1661 A quantitative real-time PCR for the Tat-transcripts demonstrated significantly higher levels  
1662 of Tat-transcripts in the EGFP<sup>High</sup> fraction compared to that in the EGFP<sup>-</sup> fraction for both the  
1663 clones. Mean values from three independent experiments ± SEM are plotted. A two-tailed,  
1664 unpaired *t*-test was used for the statistical evaluation. **(G)** and **(K)** DNA cell-cycle analysis  
1665 was performed on the EGFP<sup>-</sup> and EGFP<sup>High</sup> sub-fractions of the 4-κB (Figure 5G) and the 3-  
1666 κB (Figure 5K) clones following the standard PI-staining protocol. The overlay histograms  
1667 for the two subfractions showing the G1, S and G2/M phases are presented. The proportions  
1668 of cells in the G1, S and G2/M stages were calculated for both the subfractions and depicted  
1669 in the inset. Mean values from triplicates, representative of two independent reactions ± SD  
1670 are plotted. A two-tailed, unpaired *t*-test was used for the statistical evaluation.

1671

1672 **Figure 6: In the tunable Tat-feedback (TTF) model, the stronger the LTR-Tat feedback,**  
1673 **the higher the viral gene expression.** **(A)** A schematic of the sub-genomic HIV-1 vector  
1674 backbone- cLdGITRD representing the TTF model. The 3- and 1-κB LTRs representing a  
1675 strong and a weak promoter, respectively, have been used in the present study. The small  
1676 molecule Shield1 stabilizes the ‘Tat:RFP:DD’ cassette in a dose-dependent fashion making it  
1677 available for the subsequent transactivation events at the LTR. **(B)** Validation of Shield1  
1678 dose-dependent stabilization of the ‘Tat:RFP:DD’ cassette in HEK293T cells. One mg of the  
1679 cLdGITRD-3-κB vector was transfected into 0.6 million HEK293T cells in separate wells in

1680 the presence of varying concentrations of Shield1 as indicated, and the images were captured  
1681 48 h post-transfection. The experiment was repeated twice with comparable results. **(C)** The  
1682 experimental layout to confirm Shield1 dose-dependent gene expression and Tat-  
1683 transactivation in Jurkat cells is presented. Approximately 0.3 million Jurkat cells were  
1684 infected with the LdGITRD-3- $\kappa$ B strain (20 ng/ml p24 equivalent), and post 24 h, the  
1685 infected cells were split into four fractions, each treated with a different concentration of  
1686 Shield1 as indicated. After 48 h of Shield1 treatment, half of the cells from each fraction were  
1687 activated for 24 h followed by the quantitation of d2EGFP and Tat-mRNA expression levels  
1688 for both the induced and uninduced fractions. **(D)** Representative stacked histograms indicate  
1689 a Shield1 dose- dependent Tat-transactivated population (black arrows) at a fixed LTR-  
1690 strength (fixed number of NF- $\kappa$ B motifs). The peak-height of the d2EGFP<sup>High</sup> population  
1691 (MFI > 10<sup>4</sup> MFU) proportionally reduced with the Shield1 dose; the TTF model thus  
1692 confirmed the d2EGFP<sup>High</sup> cluster to represent the Tat-transactivated population. **(E)** The  
1693 Shield1 concentration dependent d2EGFP MFI, **(F)** fold d2EGFP enhancement, and **(G)** %  
1694 d2EGFP<sup>+</sup> plots are presented. Values from experimental triplicates  $\pm$  SD, representing two  
1695 independent experiments are plotted. Two-way ANOVA with Bonferroni post-test correction  
1696 was used for the statistical evaluation (\*\*p<0.01, \*\*\*p<0.001 and ns – non-significant). **(H)**  
1697 Relative Tat-transcript levels and **(I)** fold Tat-mediated transactivation were evaluated as in  
1698 Figures 2G and 2H, respectively. The mean values from three independent experiments  $\pm$   
1699 SEM are plotted. Two-way ANOVA with Bonferroni post-test correction was used for the  
1700 statistical evaluation (\*p<0.05, \*\*\*p<0.001 and ns – non-significant).

1701

1702 **Figure 7: The TTF model identifies two distinct modes of latency establishment in the**  
1703 **strong and the weak LTRs.** **(A)** The experimental scheme to study latency establishment as  
1704 described in Figure 4A with slight modifications. The sorted d2EGFP<sup>High</sup> cells were divided



1705 into four separate fractions and maintained at different concentrations of Shield1 as depicted.  
1706 The cells were analyzed every 24 h for d2EGFP and Tat-RFP expression using flow  
1707 cytometry. **(B)** The temporal d2EGFP and Tat-RFP trajectories for the strong (3-κB; upper  
1708 panel) and the weak (1-κB; lower panel) LTRs at the 3 μM Shield1 concentration are  
1709 presented. The black-solid and the black-dotted arrows denote the dominant and the less  
1710 dominant routes of transit for each LTR-variant, respectively. Individual kinetic curves of  
1711 the four distinct populations- **(C)** % d2EGFP<sup>+</sup> Tat-RFP<sup>-</sup>, **(D)** % d2EGFP<sup>+</sup> Tat-RFP<sup>+</sup>, **(E)** %  
1712 d2EGFP<sup>-</sup> Tat-RFP<sup>+</sup>, and **(F)** % d2EGFP<sup>-</sup> Tat-RFP<sup>-</sup>. Mean values from experimental triplicates  
1713 ± SD are plotted. Data represent three independent experiments. Two-way ANOVA with  
1714 Bonferroni post-test was used for the statistical evaluation (\*p<0.05, \*\*\*p<0.001 and ns -  
1715 non-significant). The solid- and dotted-coloured curves represent various concentrations of  
1716 Shield1 for the 3-κB and the 1-κB LTRs, respectively.

1717

1718 **Figure 8: Persistent presence of Tat in latent cells.** **(A)** The temporal profile of Tat  
1719 expression during LTR-silencing in a stable J-LdGIT-3-κB cell pool of the ATF model. The  
1720 experimental strategy of latency establishment was similar as in Figure 4A. At defined time  
1721 points, a small fraction of the sorted d2EGFP<sup>High</sup> cells was flow-analyzed for d2EGFP  
1722 expression (left panel), while the remaining cells were subjected to indirect  
1723 immunofluorescence of Tat using a rabbit anti-Tat primary antibody and an anti-rabbit Alexa-  
1724 568 conjugated secondary antibody. DAPI was used to stain the nucleus. Representative  
1725 confocal images of Tat and d2EGFP-expression at indicated time points (right panel) are  
1726 presented. Appropriate negative controls for Tat IF are presented in the bottom panels. The  
1727 white dotted line demarcates the nucleus from the extra-nuclear compartment in each cell.  
1728 Scale bar = 20 μM. **(B)** The quantitative analysis of d2EGFP and Tat-Alexa 568 intensity

1729 levels in the nuclear and extra-nuclear compartments (arbitrary units) at multiple time points.  
1730 Data from 150 individual cells at each time point and three independent experiments are  
1731 presented. The threshold values for total cellular d2EGFP and Tat-Alexa 568 intensities were  
1732 obtained from uninfected Jurkat cells (Figure 8A; Lane-8) and infected, unstained cells (Fig  
1733 8A; Lane-6), respectively. Mean values  $\pm$  SEM are plotted. One-way ANOVA was used for  
1734 statistical evaluation (\*\*p<0.001).

1735

1736 **Figure 9: The presence of Tat in latent cells as confirmed by the highly sensitive**  
1737 **proximity ligation assay (PLA).** (A) The detection of exogenous B-Tat in PLA.  
1738 Approximately 0.5 million HEK293T cells seeded per well in a 12-well culture dish were  
1739 transfected with 800 ng of pLGIT, an expression vector encoding Tat of HIV-1B, on poly-L-  
1740 lysine coated coverslips. Tat-PLA was performed according to the manufacturer's protocol  
1741 using a pair of anti-Tat primary antibodies (rabbit-polyclonal; # ab43014, Abcam and mouse-  
1742 monoclonal; # 7377, NIH-AIDS reagents program). Representative confocal images of a 'no  
1743 antibody' control (Lane 1), single anti-Tat antibody controls (Lanes 2 and 3) and both the  
1744 antibodies (Lane 4) are presented. The mean values from three independent experiments  $\pm$   
1745 SEM are plotted. A one-way ANOVA with Bonferroni's multiple comparison post-test was  
1746 used for statistical analyses (\*\*p<0.001). (B) A DNA dose-response of PLA using pcLGIT,  
1747 an expression vector encoding Tat of HIV-1C (200, 400, 800 ng). The mean GFP intensities  
1748 and the average number of PLA dots per cell for the amount of pcLGIT vector transfected are  
1749 presented. (C) The Tat PLA dot quantitation in the active vs. latent cells was performed in  
1750 HEK293 cells independently and stably infected with the cLdGIT-4- $\kappa$ B and 3- $\kappa$ B strains of  
1751 the ATF panel (Figure 2A). Cells were infected with one of the viral strains (~ 0.5 RIU),  
1752 d2EGFP<sup>High</sup> cells were sorted, the cells were incubated for proviral-LTR relaxation to arrive  
1753 at a mixed population of d2EGFP<sup>+</sup> (active) and d2EGFP<sup>-</sup> (latent) cells, and both the cell

1754 populations were subjected to Tat-PLA. Approximately 50,000 mixed d2EGFP cells seeded  
1755 in a well of an 8-well slide chamber were subjected to PLA. Representative confocal images  
1756 depicting single antibody controls (Lanes-1 and 2) and Tat-PLA with both the antibodies  
1757 (Lanes-3 and 4) are shown (left panel). Two sub-fields with distinct Tat-PLA dots (white) in  
1758 both d2EGFP<sup>+</sup> and d2GFP<sup>-</sup> cells have been enlarged for clarity. The number of Tat-PLA dots  
1759 per cell was determined independently for d2EGFP<sup>+</sup> as well as d2EGFP<sup>-</sup> cells, and the mean  
1760 values from three independent experiments  $\pm$  SEM are plotted. The total number of cells  
1761 counted for d2EGFP<sup>+</sup> phenotype was 164 (128 for 4- $\kappa$ B and 36 for 3- $\kappa$ B) and for d2EGFP<sup>-</sup>  
1762 phenotype was 168 (123 for 4- $\kappa$ B and 45 for 3- $\kappa$ B). A two-tailed, unpaired *t*-test was used for  
1763 statistical analyses.

1764

1765 **Figure 10: The active and latent LTRs recruit host-factors differentially.** (A) Schematic  
1766 representation of the LTR sequence and the positions of the primer pairs used in the  
1767 conventional PCR (240 bp, solid-black) and qPCR (127 bp, dotted black) for the ChIP  
1768 analysis is depicted. (B) and (E) The pre-sort percentages of the EGFP<sup>-</sup> and EGFP<sup>High</sup> cells  
1769 corresponding to the 4- $\kappa$ B (Panel-B) and the 3- $\kappa$ B (Panel-E) bimodal clones are presented.  
1770 (C) and (F) Data from a conventional PCR-based ChIP assay of the active (EGFP<sup>High</sup>) and  
1771 latent (EGFP<sup>-</sup>) promoters for several host factors and Tat protein are presented for the 4- $\kappa$ B  
1772 (Panel-C) and 3- $\kappa$ B (Panel-F) clones, respectively. Cell-lysate from two million cells (active  
1773 or latent) and 2  $\mu$ g of the respective antibody were used for the individual IP reactions. A  
1774 rabbit polyclonal anti-Tat antibody (# ab43014, Abcam) was used for the Tat-IP. One-tenth  
1775 of the IP chromatin was used as the input control. Conventional PCR was repeated thrice for  
1776 each IP reaction. Representative gel image and the corresponding densitometry analyses are  
1777 presented. Data for each band are normalized to the input. The mean values from

1778 quadruplicates  $\pm$  SD are plotted. A two-tailed, unpaired *t*-test was used for statistical analyses  
1779 (\**p*<0.05, \*\**p*<0.01, \*\*\**p*<0.001, and ns- non-significant). A qPCR-based ChIP assay was  
1780 performed independently using identical experimental conditions and **(D)** the 4-κB or **(G)** the  
1781 3-κB clones. The data for each IP was calculated using the percent-input method. The mean  
1782 values from qPCR triplicates  $\pm$  SD are plotted. A two-tailed, unpaired *t*-test was used for  
1783 statistical analyses (\**p*<0.05, \*\**p*<0.01, \*\*\**p*<0.001, and ns- non-significant). **(H)** Two  
1784 additional qPCR-based ChIP assays using two different mouse monoclonal anti-Tat  
1785 antibodies (1D9 and NT3 5A5.3) were performed using the active and latent fractions of the  
1786 two bimodal clones. The mean values from qPCR triplicates  $\pm$  SD are plotted. A two-tailed,  
1787 unpaired *t*-test was used for statistical analyses (\**p*<0.05, \*\**p*<0.01, \*\*\**p*<0.001, and ns-  
1788 non-significant).

1789

1790 **Figure 11: A hypothetical model depicting a concentration-dependent switch of the Tat**  
1791 **protein through differential PTM(s) that mutually serve as an activator or suppressor at**  
1792 **different phases of viral transcription.** The model suggests that the diverse PTM(s) of Tat  
1793 play a critical role in permitting the transactivator to toggle between being an activator or  
1794 suppressor of transactivation of the LTR. At the time of commitment to latency, the  
1795 intracellular concentrations of Tat are not limiting. Tat may initiate a negative feedback  
1796 response of viral transcription in a concentration-dependent manner by regulating the  
1797 expression of host factors that control the PTM(s) of Tat. The negative feedback effect of Tat,  
1798 therefore, follows its initial positive feedback on the viral promoter. A viral promoter  
1799 characterized by stronger transcriptional activity, thus, mediates the establishment of latency  
1800 at a faster rate by producing more quantities of Tat. The data presented in this work are  
1801 consistent with this model.

1802

1803

# Figure 1

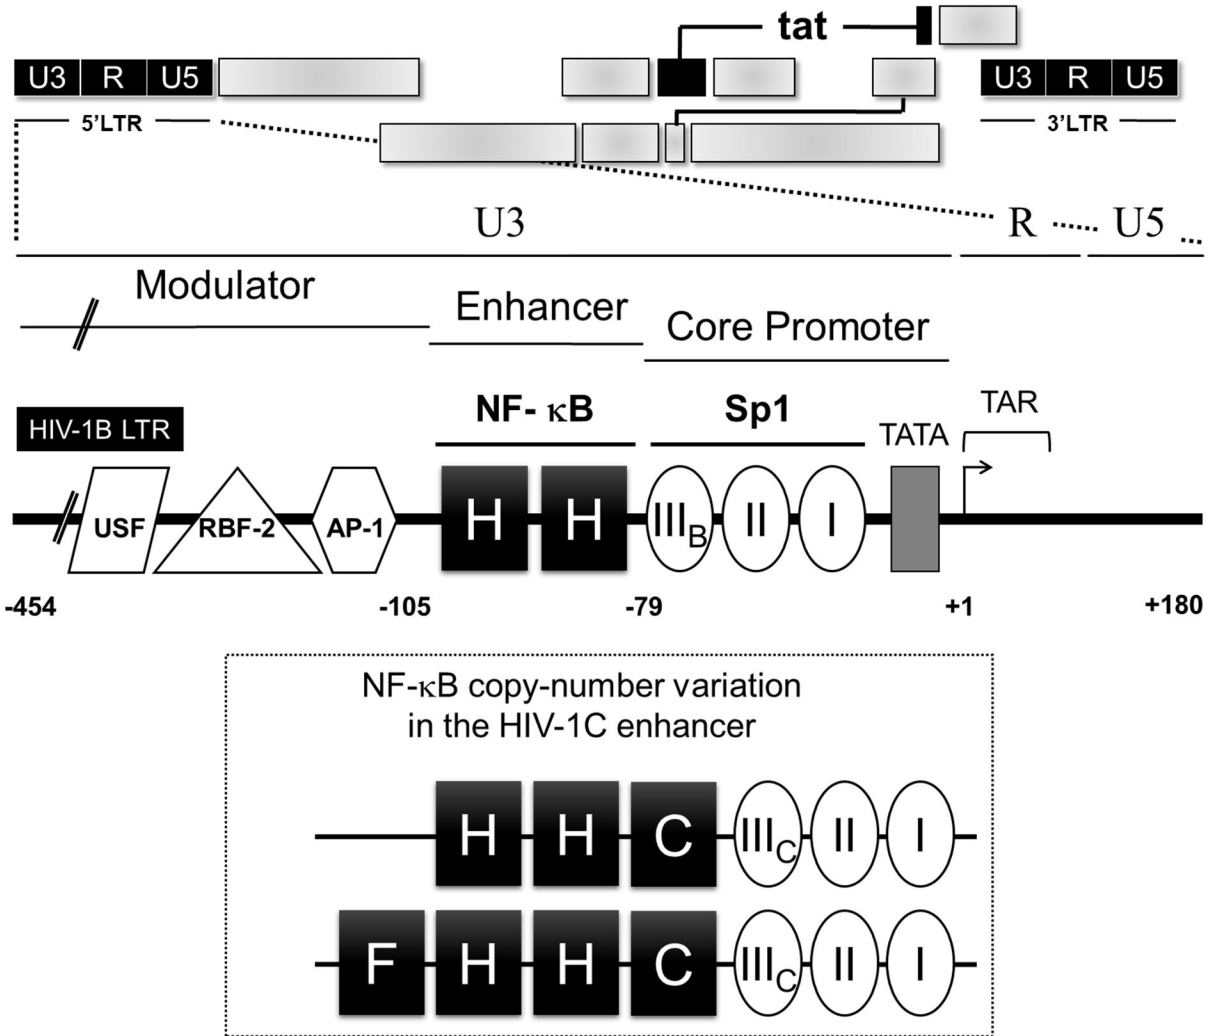



# Figure 3

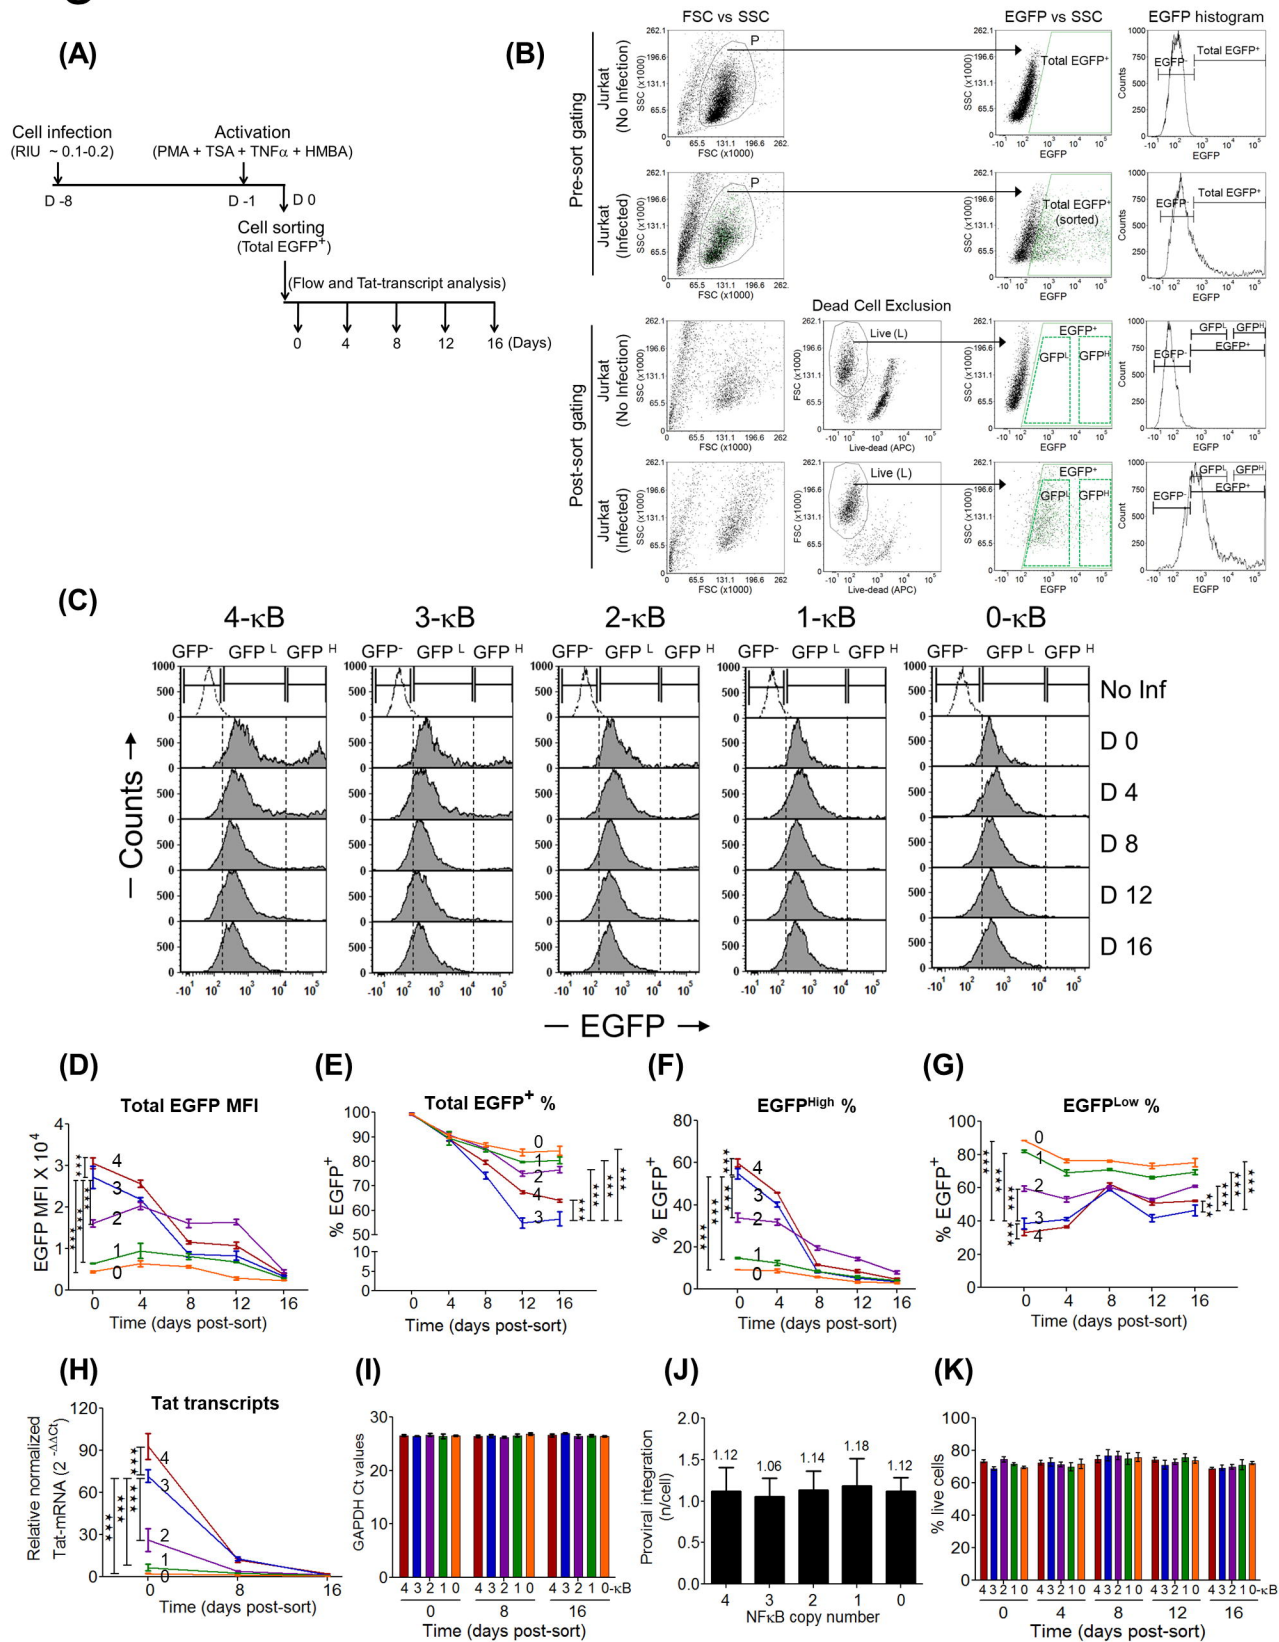



# Figure 4

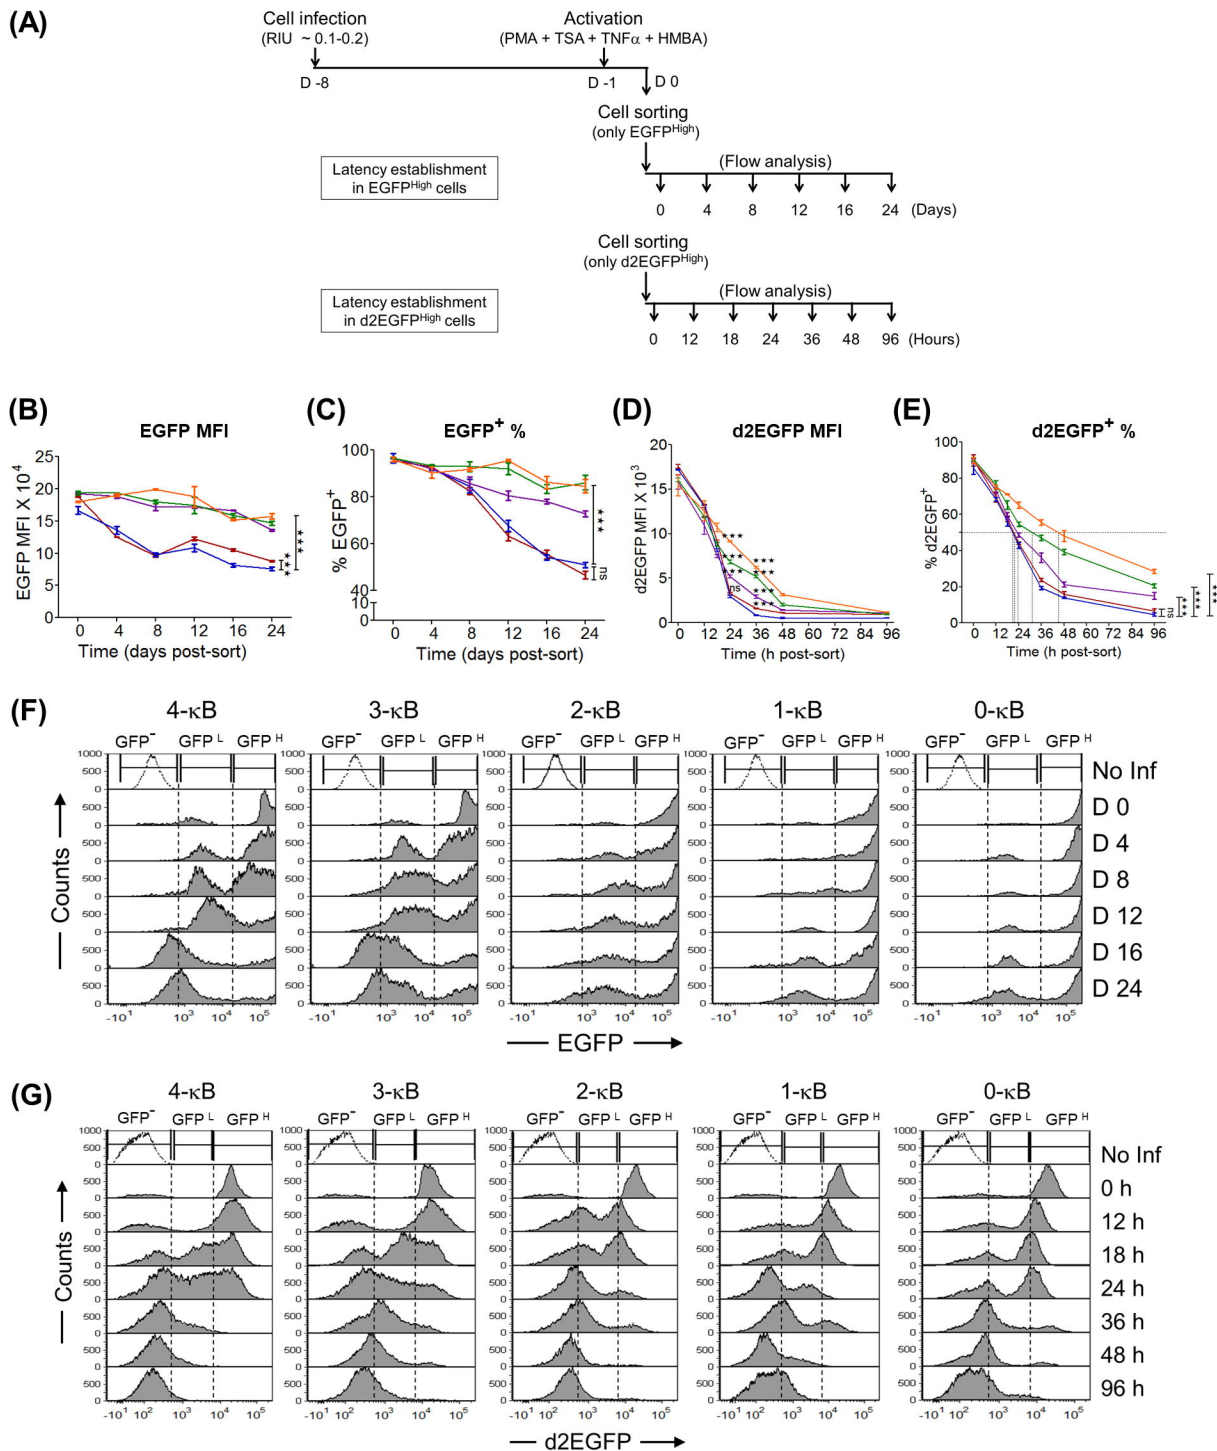

# Figure 5

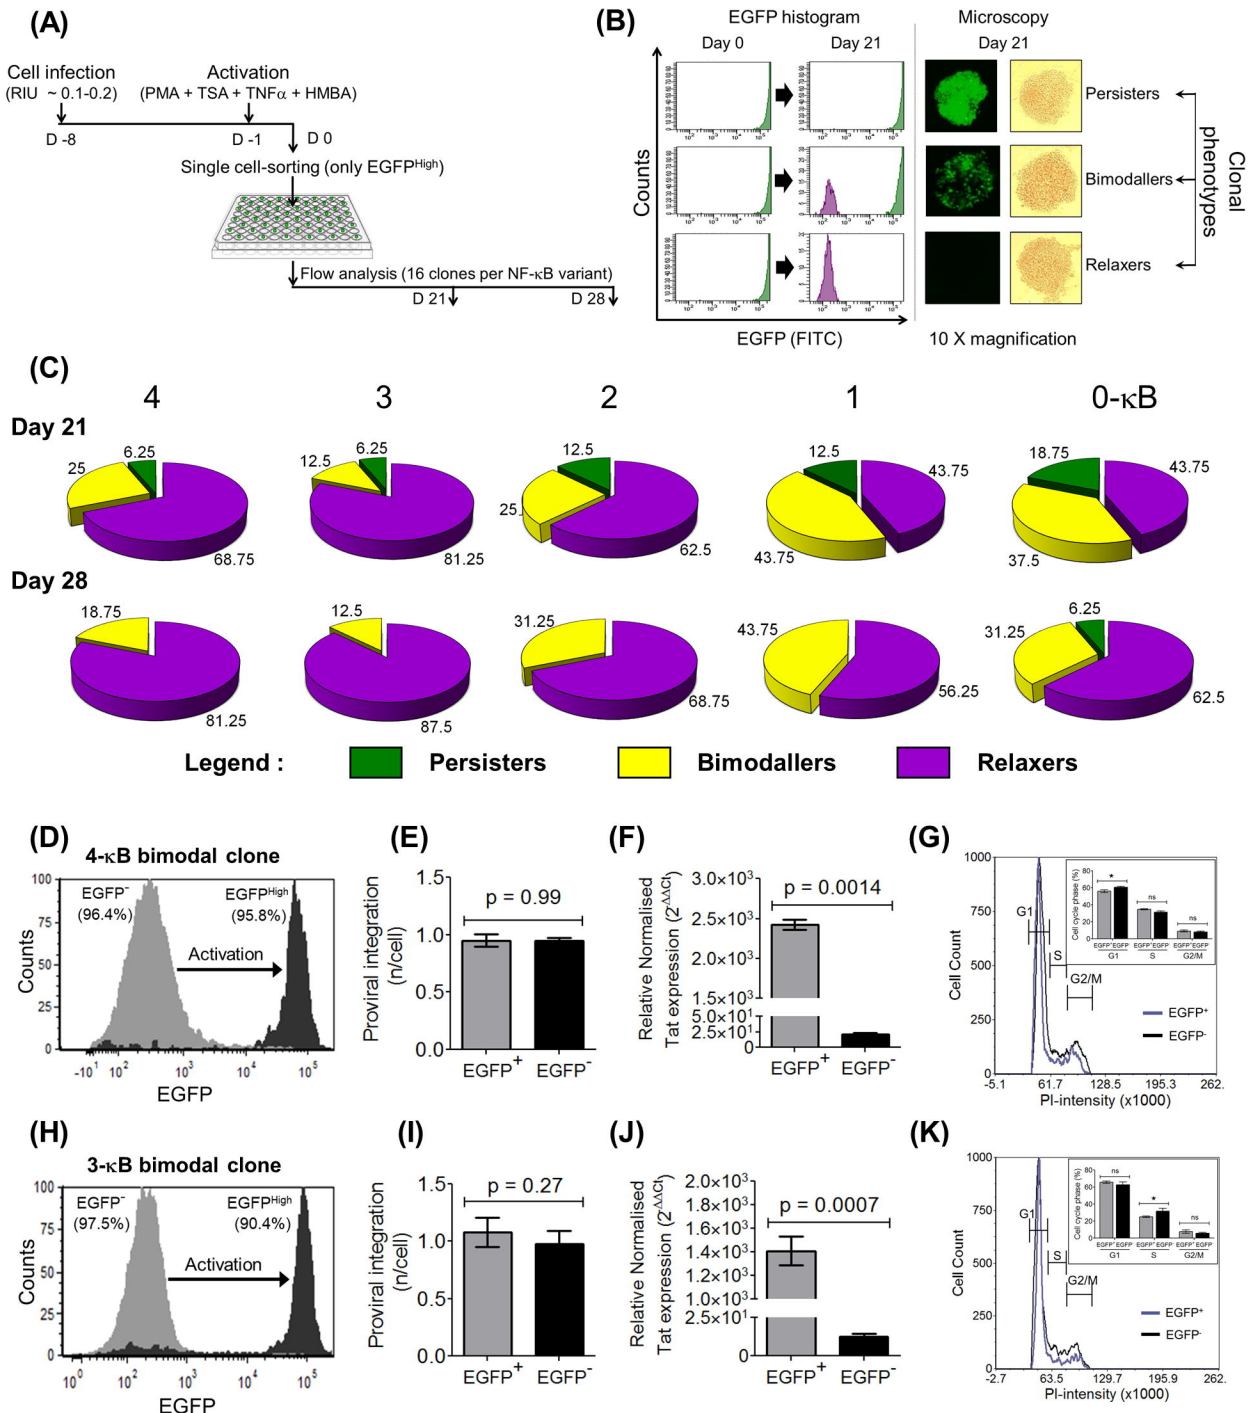

# Figure 6

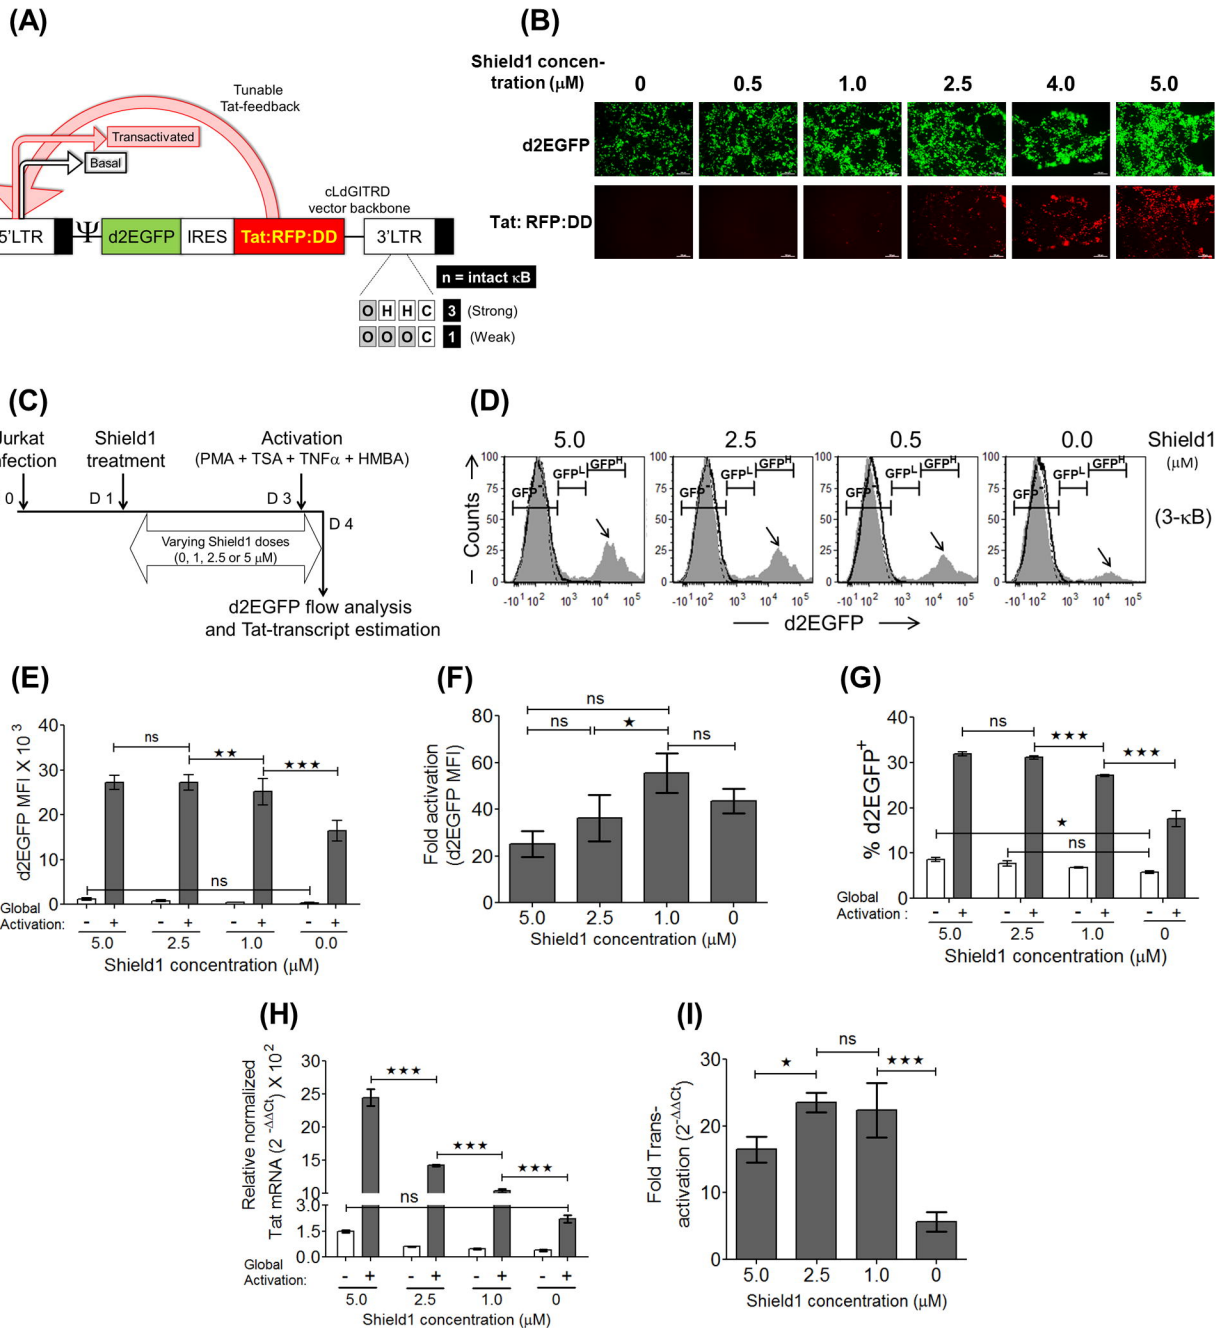

# Figure 7

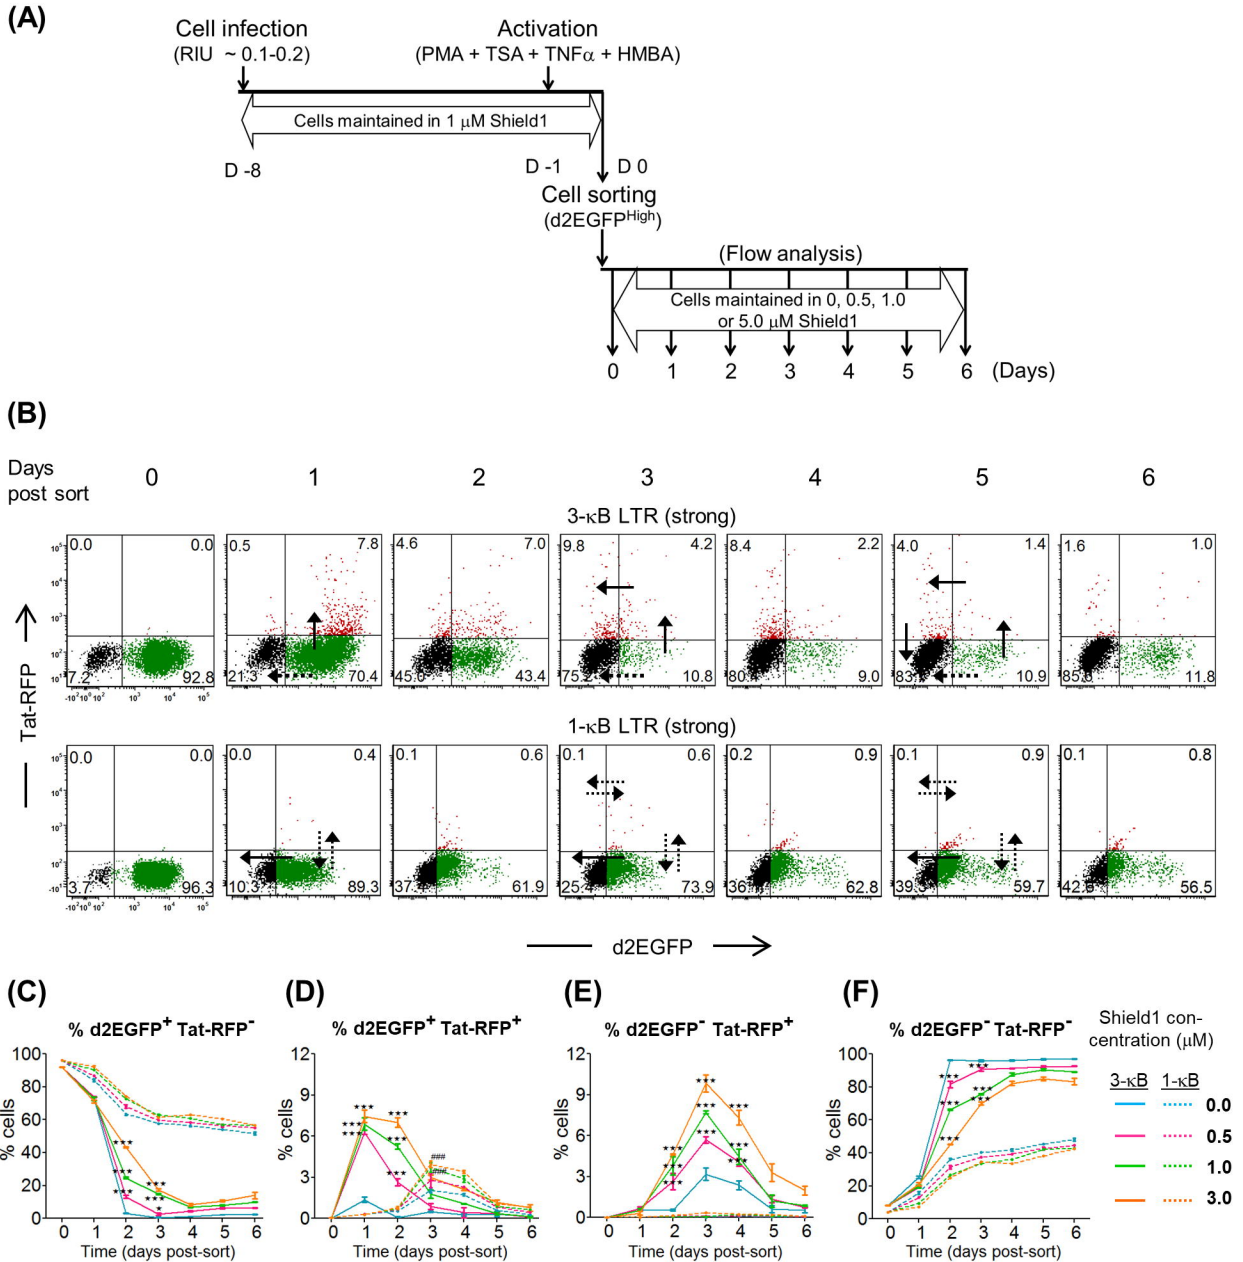

# Figure 8

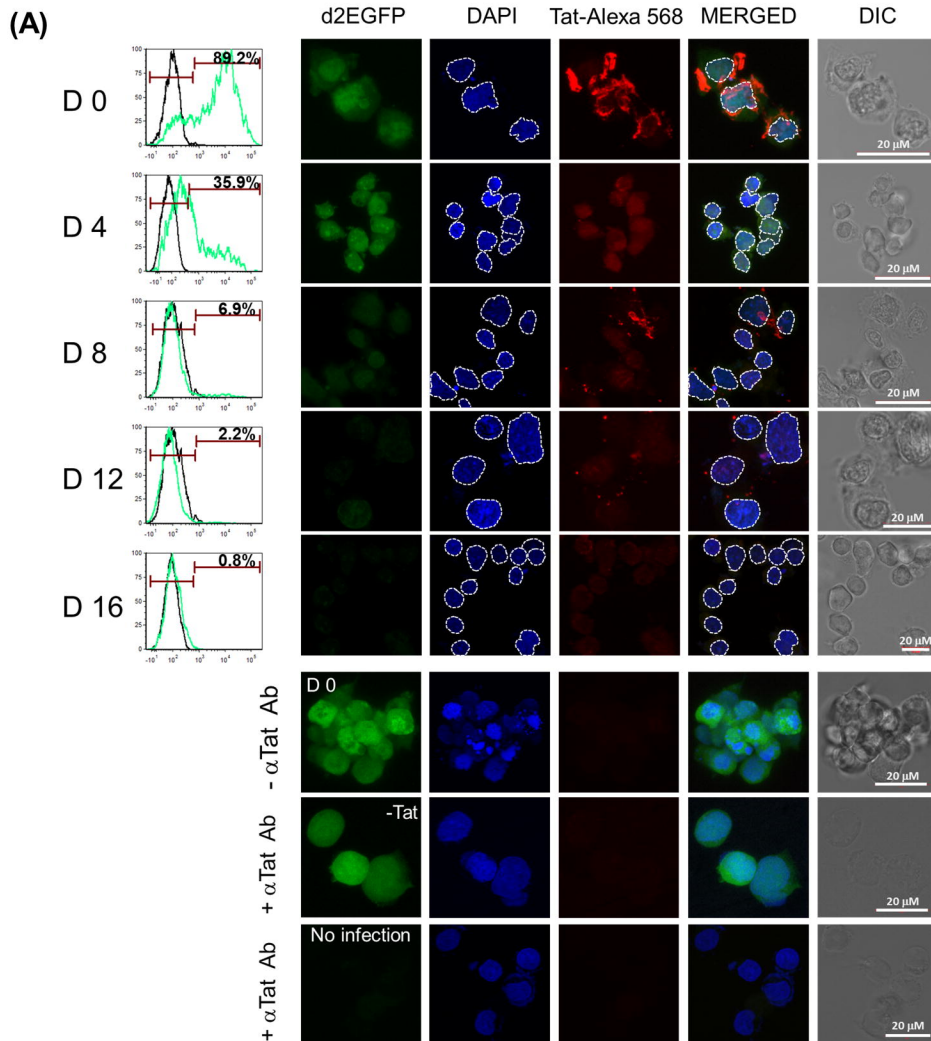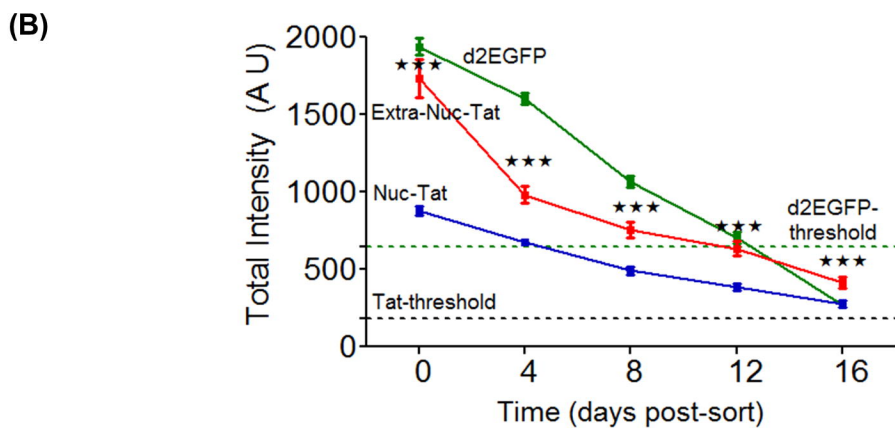



# Figure 9

## (A) Validation of $\alpha$ Tat antibodies for PLA (exogenous B-Tat)

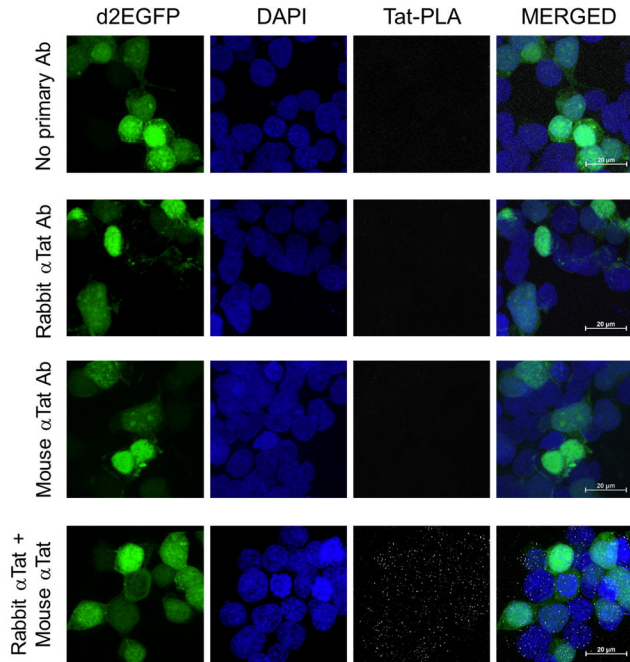

## (B) Validation of $\alpha$ Tat antibodies for PLA (exogenous C-Tat)

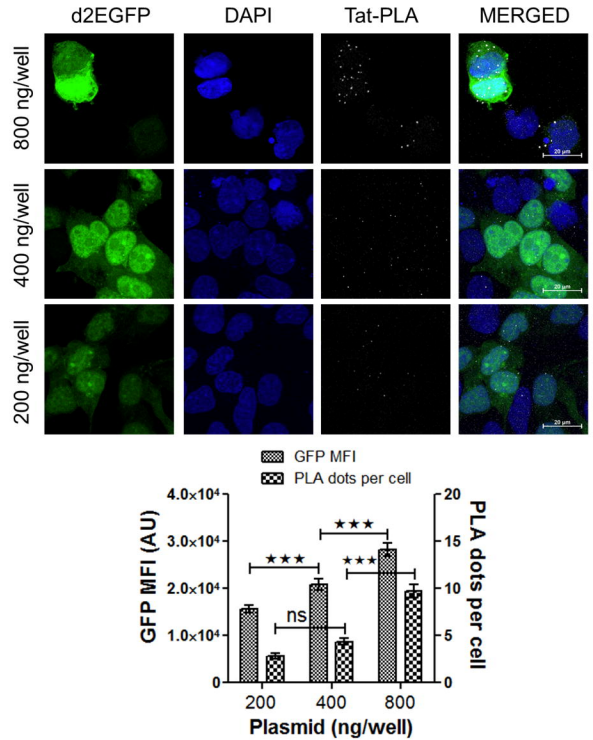

## (C) Detection of Tat protein in active and latent cells using PLA

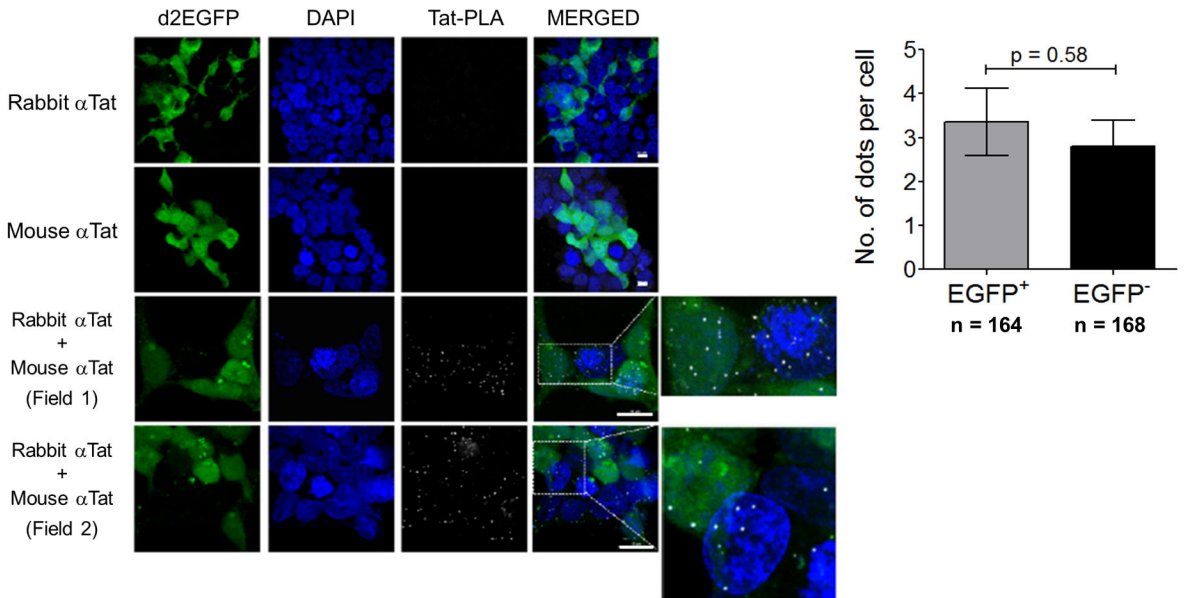

# Figure 10

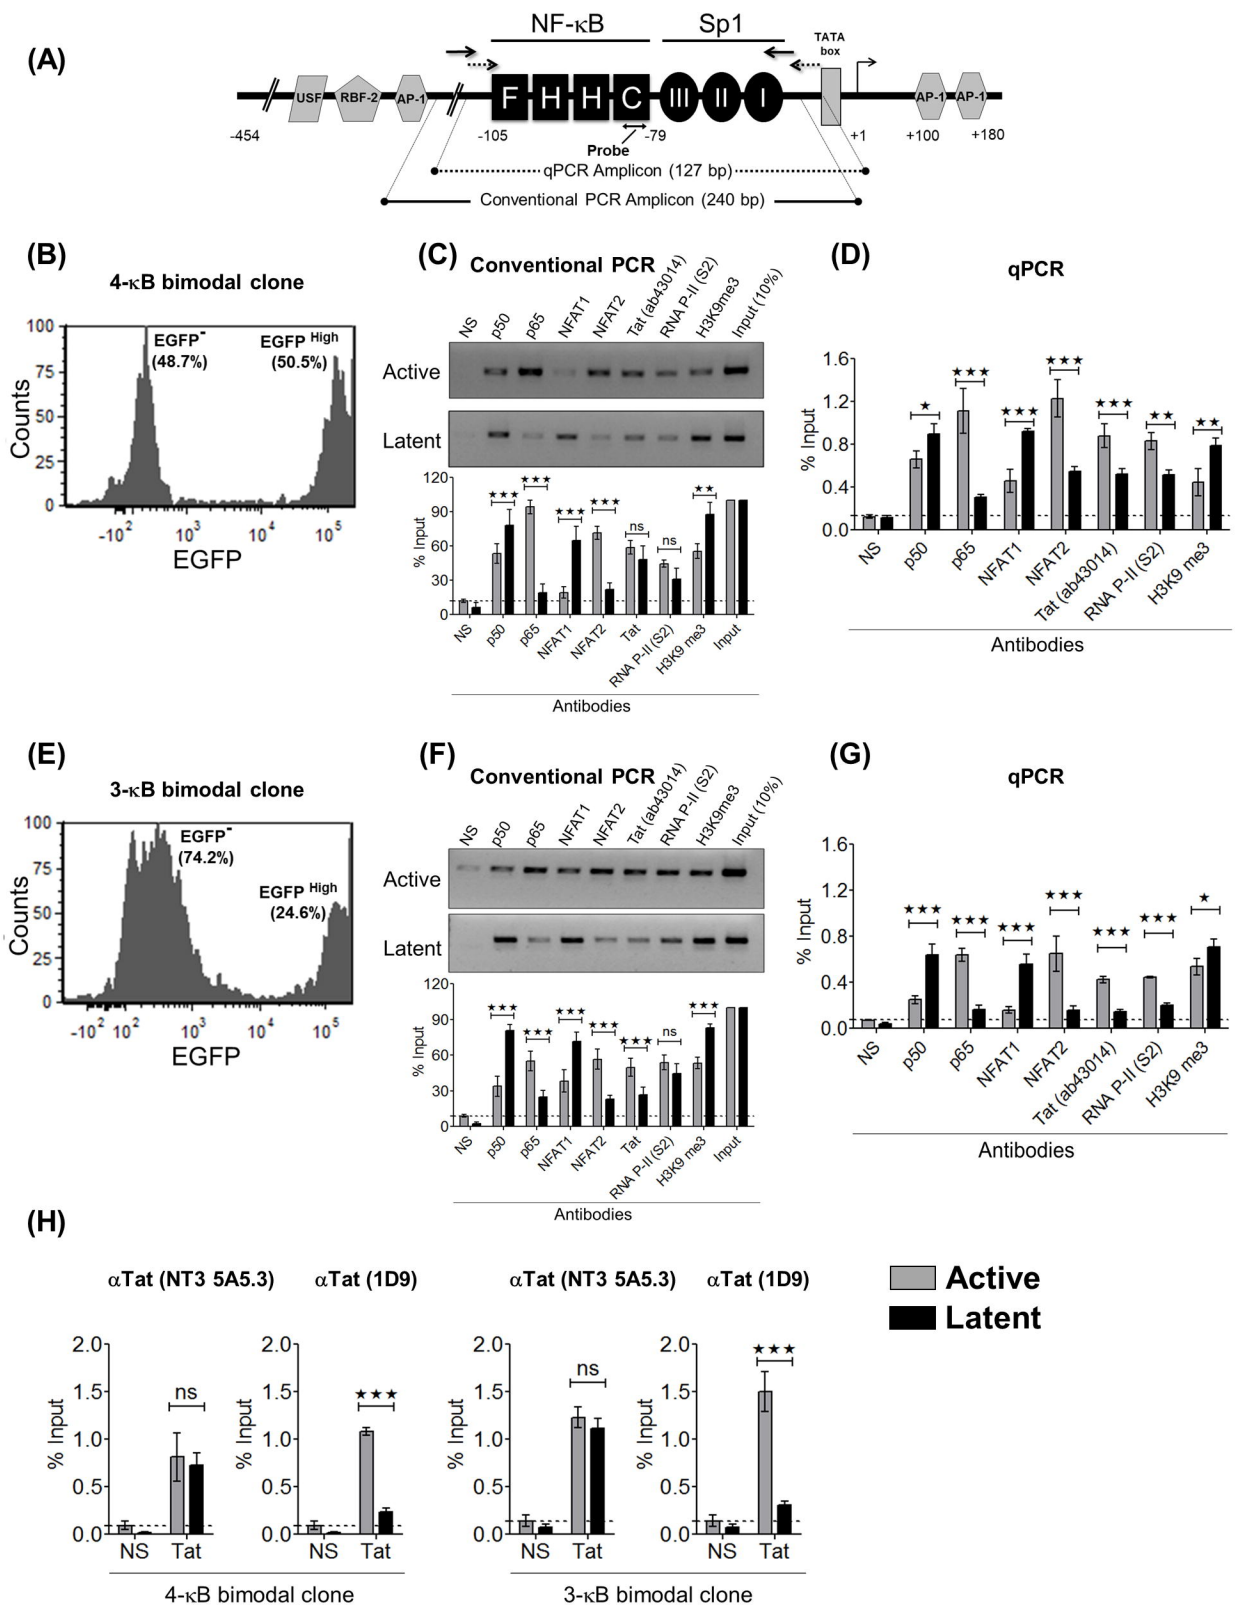

# Figure 11

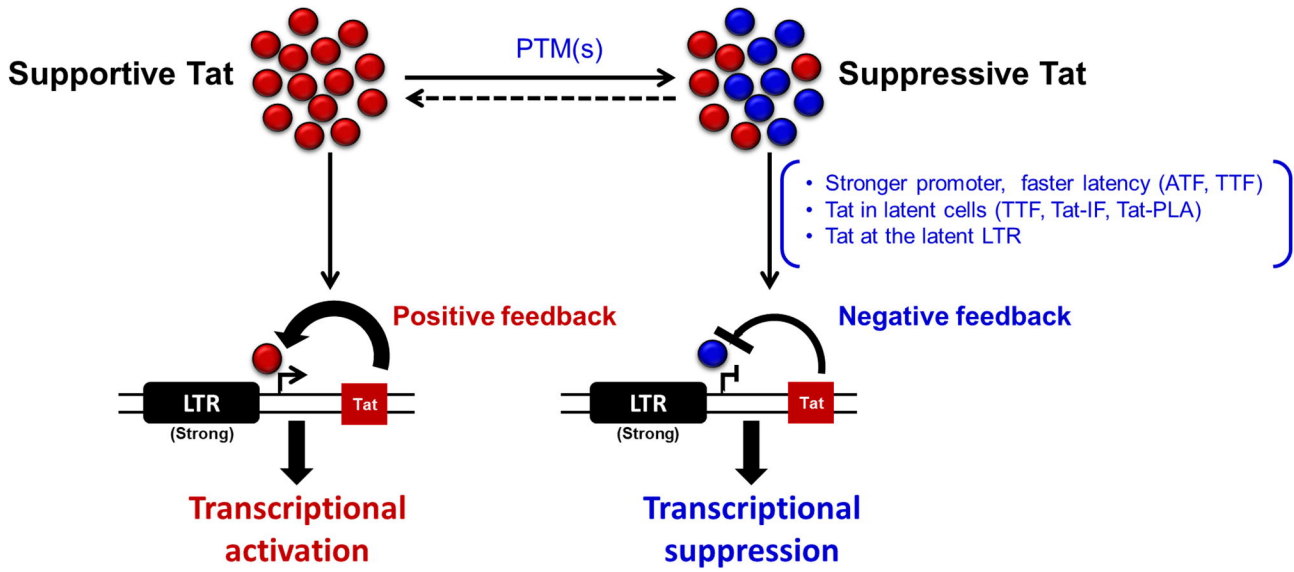

Source: https://www.biorxiv.org/content/10.1101/2020.02.20.958892v2.full.pdf
